# Supplementary material for: The Key Metabolic Network and Genes Regulating the Fresh Fruit Texture of Jujube (Ziziphus jujuba Mill.) Revealed via Metabolomic and Transcriptomic Analysis
Source: Plants (Basel). 2023 May 24;12(11):2087. doi: 10.3390/plants12112087 (PMC10255913; doi:10.3390/plants12112087)
Supplement: Supplementary file 1 [file plants-12-02087-s001.zip › Supplementary Table.xlsx]

## Sheet: Table S1
Table S1. List of metabolites identified in this study.
Adduct	Description	Class	D-M-E-1	D-M-E-2	D-M-E-3	D-E-E-1	D-E-E-2	D-E-E-3	D-M-G-1	D-M-G-2	D-M-G-3	D-E-G-1	D-E-G-2	D-E-G-3	D-M-W-1	D-M-W-2	D-M-W-3	D-E-W-1	D-E-W-2	D-E-W-3	D-M-H-1	D-M-H-2	D-M-H-3	D-E-H-1	D-E-H-2	D-E-H-3	P-M-E-1	P-M-E-2	P-M-E-3	P-E-E-1	P-E-E-2	P-E-E-3	P-M-G-1	P-M-G-2	P-M-G-3	P-E-G-1	P-E-G-2	P-E-G-3	P-M-W-1	P-M-W-2	P-M-W-3	P-E-W-1	P-E-W-2	P-E-W-3	P-M-H-1	P-M-H-2	P-M-H-3	P-E-H-1	P-E-H-2
(M+H)+	4-Aminobutyric acid	Organic acids and derivatives	37283.5	33207.2	35952.6	42511.7	46479.7	57441.2	46950.3	32369.1	15244.3	48785.9	41891.1	38058.7	6995.48	9066.11	12794.8	8360.31	42156.2	9539.54	3116.27	6584.85	8169.52	11244.9	7080.49	11312	56097.2	55495.8	50604.3	66275.1	71927.5	64308.3	13810.6	18987.6	17027.3	38331.6	21308.5	32459.8	17103.5	8301.66	10592.1	17980.7	17075.8	14175.1	8012.78	8900.19	6574.88	13700.3	18254.4
(M+H)+	5-L-Glutamyl-L-alanine	Organic acids and derivatives	1549.12	2332.24	1769.21	5889.07	10185.7	4808.78	4172.68	3515.98	4759.45	10511.6	6240.02	5243.74	768.894	1320.17	1124.23	5883.64	3844.47	2310.21	886.665	961.027	936.435	364.205	2516.48	517.119	241308	305366	454984	30392.2	27487.1	78304.6	5605.57	4995.69	4477.84	12691.5	6773.51	7278.8	6768.27	2974.78	4974.14	4600.95	8229.57	6328.95	5035.76	4810.8	1426.12	2762.77	5129.16
(M+H-H2O)+	6-Aminocaproic acid	Unclassified	31955.5	29329.7	27480	11073.5	11630.5	12257.1	29150.4	36311.5	50969.3	1832.7	6414.66	5046.89	31984.2	32953.5	36002.3	6278.91	6683	4926.67	20875.8	19573.7	22679.8	4735.56	4728.51	5637.65	49754.7	50151.5	46958.4	15808	16569.4	16607.3	43604.5	52232.5	53273.9	8997.51	8503.6	10315.2	65985	43206.8	42020.4	8201.88	8077.95	11315.9	42018.4	48411.4	40814.9	9536.46	8762.68
(M+H)+	Adenine	Unclassified	171519	151335	226921	27064.2	17822.9	31385.4	469044	581679	1.01962e+06	13379.9	12596.7	15358.8	946402	1.10826e+06	904758	29214.8	27213.4	19318.2	1.26892e+06	809504	1.23326e+06	44170.3	37661.9	39639.3	577894	648665	434637	170813	167154	188926	1.06939e+06	1.25662e+06	1.63477e+06	61872.6	66364.4	59195.3	2.3563e+06	809940	1.06607e+06	60837.7	68812	36040.7	964873	546410	534369	114523	92631.4
(M+H-2H2O)+	Diethanolamine	Organic nitrogen compounds	93666.1	107138	118645	618616	860759	630429	66310.7	154610	94561.1	679976	883925	886173	14393.1	15917.2	10990.2	441965	362461	157649	7389.76	4645.79	3494.47	57055.8	68819.8	73350	11869	20339.3	25407.4	174055	251677	382846	6090.59	4074.46	6887.3	283161	146086	203258	4174.78	3298.3	4538.38	73060.6	202686	109467	2971.95	4835.99	601.885	54889.5	24821.8
(M+H)+	Isomaltose	Organic oxygen compounds	77316.5	77532.4	60989.8	6854.23	8888.21	6403.2	357601	318685	393409	292178	232168	231231	689037	632846	599650	724772	735580	613361	1.11404e+06	958074	907308	784949	720081	861821	51837.7	54138.2	38091.2	11560	3639.09	2885.48	356572	331805	379469	274752	240968	336218	810224	677924	785375	616834	624417	690890	842167	1.05686e+06	934824	892885	833813
(M+H-2H2O)+	L-(-)Sorbose	Unclassified	74051	59474.2	53692.6	6449.18	9831.21	6552.61	293580	256290	322618	238343	182031	168161	500264	514192	503294	552097	594811	482731	886331	790930	725100	668864	605084	679910	48107.3	39399.5	32280.7	10485.4	35634	3892.82	302183	264878	312226	209005	205984	273691	666711	537460	672048	481125	498474	563562	693932	844262	753096	717597	644703
(M+CH3CN+H)+	N-Acetyl-L-glutamate	Organic acids and derivatives	63436	66687.3	111436	3.00485e+06	4.048e+06	3.73053e+06	31462.8	17389.2	16512.5	88841.5	59639.9	33153.1	101414	20794.4	30086.9	93787.9	55178.5	18384.8	33160.7	25150.8	35687.3	8505	9370.37	29623	338687	335285	462030	6.29308e+06	5.98674e+06	7.18777e+06	18372.3	8995.27	10986.5	28123.7	16694.9	12120.7	48319	34853.2	34414.1	16196.2	19770.7	99579.6	141866	54866.8	42032.1	21427.4	20424.7
(M+CH3COO+2H)+	N-Acetylglutamine	Organic acids and derivatives	3288.17	3365.84	3316.53	13754.7	31575.4	23137.2	2059.01	1571.76	1547.41	2693.43	1789.97	1384.46	828.312	1626.43	1686.82	3383.09	3028.76	1406.35	2562.41	2418.25	1563.22	1474.12	587.19	3112.5	26729.6	23136.8	39486.7	36065.2	43390.2	57888.2	4134.95	1659.86	2213.97	4769.77	2736.41	2872.05	5182.92	1879.01	2234.48	4559.31	6292.29	7723.7	1158.76	4112.35	2155.92	4572.72	3188.79
(M+H)+	Naringenin-7-O-Glucoside	Unclassified	25180.5	40321.1	26837.6	6832.87	7554.45	7123.28	966.214	834.578	20621.8	7561.57	6849.87	3609.81	858.978	1415.5	3342.66	6745.6	11234.7	4802.48	948.748	1114.36	877.192	4395.03	6492.98	5132.7	90368.8	76571.9	83480.1	4027.6	4485.56	4106.43	11236.3	584.496	505.856	2672.02	3017.01	3320.18	1169.76	4497.87	4454.57	2764.87	3083.06	5787.03	5325.24	1129.17	773.83	4195.85	2451.38
(M+H)+	NG,NG-dimethyl-L-arginine(ADMA)	Organic acids and derivatives	9401.42	8009.43	12142	5961.25	8730.71	3121.05	20492.3	6608.68	27198.8	25237.5	2511.54	1340.09	24061.3	25006.8	4821.96	63798.1	57847	51418.3	43868.8	37466.6	59163.6	25242.6	30321.5	78162.2	16089.1	20397.3	26365.5	27579.5	5268.35	36120.9	16998.3	13621.7	11016.9	3111.7	9116.58	14512.1	48416.1	19591	18237.2	6837.5	27888.2	22034.8	15720	45173	26587.6	25630.2	12030.2
(M+H)+	Nicotinamide	Organoheterocyclic compounds	166659	79542	148790	11557.2	10843.4	21674.5	52123.9	57290.7	63963.2	9928.83	7385.21	6605.17	21281.1	32051.9	24712.1	10115.9	13432.6	10008.2	76696.2	66563	40438.2	26434.6	28353.7	38220.5	353857	469921	380489	159602	141925	175066	47440.7	59706.3	65553.5	54438.7	51031.4	46815.9	47795.5	28176.6	31886.3	29530.7	52746	43063.2	22336	47193.4	23483	45573.1	33731.9
(M+H)+	Pantothenol	Lipids and lipid-like molecules	501413	674111	534642	6699.84	3491.86	8073.64	319244	981.611	3087.64	6110.15	10071.5	8349.94	4794.1	194904	1360.4	1199.72	1128.8	490.195	144774	186035	112901	20153.3	678.211	861.708	962309	1.13281e+06	1.1129e+06	19865	13597.4	80879.3	377333	964.935	1255.76	6467.44	18028.4	9640.72	2300.01	729.306	169223	1626.92	2882.39	2722.57	759.693	203042	132891	2899.77	82264
(M+H)+	Phosphorylcholine	Organic nitrogen compounds	102430	105205	100013	78827.1	199138	272803	45554.2	125047	92166.5	36923.4	89810.5	40735.8	15658.8	15794.5	17577.3	22267.6	25166.1	19004	17432.4	15789.1	19325.4	10426	17630.1	31470.7	84624.4	58615.9	82027.2	139132	115737	141256	118253	74688.4	60724.5	84228.3	63575.6	60007	61874.1	28853.7	14620.3	36294.1	18644.9	20128.8	12833	18922.5	18384.1	15259.6	16460.6
(M+H)+	Scopoletin	Phenylpropanoids and polyketides	51049.5	54702.2	21167.2	67770.8	36225.6	66568.3	217702	74999.8	188366	59510.3	49113.2	29900.7	121005	140283	124342	61048.3	39827.5	16799.4	84066	100947	127270	29717.3	18327.6	18270	114296	107174	116360	54820.2	100117	68301.2	178843	224022	316642	26932.1	28445.4	45259.9	255600	189404	237908	23024.8	15276.3	19862.3	214381	124403	118856	40762.3	41432.2
(M+H)+	Triethanolamine	Organonitrogen compounds	7815.32	6275.01	9575.65	10322.8	17926.5	19341.8	8920.05	6488.34	11426.7	10766	5463.93	9522.77	12043.4	8049.3	15122.5	6376.56	5684.5	4672.53	13614	7532.9	5596.96	8680.97	5788.5	5704.92	29050.8	22150.9	17976.3	67161.4	18803.8	23308.6	12345.3	17625.2	12980.2	7771.62	10827.3	11600.8	12058.7	8014.8	12026.9	8401.82	7562.78	5175.31	12342.4	9309.05	7468.21	8751.81	7712.47
(M+H)+	Val-Thr	Unclassified	1962.61	702.635	2036.3	893.823	2953.18	2984.05	1850.67	2023.54	1320.3	2672.34	1902.21	2018.28	4776.9	2363.1	904.221	4506.04	4675.73	1117.01	1638.17	2995.27	1158.37	4401.84	6669.44	6508.86	28674.1	34871.2	16195.9	12847.7	11154.2	10948	1700.9	1009.32	1674.87	4400.16	3990.41	3696.05	3769.17	813.798	1845.65	4789.5	3739.56	5456.45	1431.8	3012.27	1217.74	4806.64	4293.64
(M+H)+	(-)-Epicatechin	Unclassified	3.8901e+06	2.14089e+06	2.06952e+06	1.81596e+07	1.8844e+07	1.52135e+07	1.77693e+06	2.10004e+06	1.10564e+06	3.49598e+07	3.05904e+07	1.61444e+07	641598	999191	680070	1.699e+07	5.23712e+07	2.02736e+07	945257	898236	711763	1.52798e+07	1.54097e+07	2.18614e+07	777496	667625	1.60939e+06	307166	407617	348261	529488	783777	1.15679e+06	3.47496e+06	3.7351e+06	1.05547e+06	1.01457e+06	1.83694e+06	2.53316e+06	1.44623e+07	1.15535e+06	3.45641e+06	697653	1.86406e+06	947490	3.03116e+06	1.58221e+07
(M+H)+	Agmatine	Organic nitrogen compounds	1.25856e+06	1.41512e+06	522108	269510	1.15096e+06	2.44975e+06	986945	1.50934e+06	921986	990810	579044	546837	1.29485e+06	2.15993e+06	2.87571e+06	717727	3.74469e+06	1.1682e+06	1.39157e+06	1.30172e+06	1.06452e+06	100374	682654	193827	345454	460248	539733	1.1522e+06	2.49565e+06	1.20731e+06	930697	2.18588e+06	1.84076e+06	2.59556e+06	1.29133e+06	873157	808873	3.87456e+06	2.75455e+06	587422	2.76007e+06	781242	1.51126e+06	2.2084e+06	1.64368e+06	3.71457e+06	3.15568e+06
(M+H)+	Gentisaldehyde	Organic oxygen compounds	345306	185013	169983	1.77764e+06	1.51579e+06	1.33053e+06	163133	219927	98743.9	2.6113e+06	2.31767e+06	1.48168e+06	30103.2	97511.6	57983.5	1.73415e+06	4.45012e+06	1.68113e+06	45111.7	104872	76446.4	1.29388e+06	1.34411e+06	1.79873e+06	64954.4	62014.3	150662	61273.8	55653.8	48505.6	58595.9	77719.6	134197	219973	330033	112438	11847.4	169437	233061	1.21921e+06	108568	292022	71860.7	185641	91782.4	271161	1.44895e+06
M+	Glycerophosphocholine	Lipids and lipid-like molecules	58342.1	42004.7	34716.1	96582.1	95600.5	164865	805794	738070	900164	652743	468773	475633	1.58715e+06	1.48675e+06	1.38875e+06	1.51608e+06	1.30866e+06	1.31933e+06	2.69095e+06	2.70622e+06	2.65293e+06	1.73982e+06	1.61183e+06	2.05154e+06	132199	74318.2	79726	380086	294719	423291	1.14935e+06	1.3958e+06	613067	1.22796e+06	764674	1.21481e+06	2.16044e+06	1.95962e+06	2.18392e+06	1.33247e+06	1.4841e+06	1.43181e+06	2.16699e+06	2.92276e+06	2.6657e+06	2.03832e+06	1.69456e+06
(M+H)+	Morin	Unclassified	15855.1	5380.12	8345.29	160135	423065	343983	12199.1	5514.03	2860.03	79157.6	328755	75620.8	1777.5	10582.9	8324.99	58825.1	63476.5	51718.8	13249.4	6080.75	3031.86	63127.1	24968.8	52493.7	22955.2	33003.8	16318.4	90625.6	235498	287172	6710.07	7391.86	28187.2	47475.8	56861	78093.6	2762.86	1013.55	22611.3	36932.4	46793.2	86790.9	3138.85	6719.45	3911.64	43265.4	45749.7
(M+Na)+	Thioetheramide-PC	Unclassified	49445.6	59836	82389.1	477822	114485	314973	11319.5	11699.3	2958.59	507340	487724	399319	51314.7	37525	21162.2	53248.9	190017	596408	19485.1	64452.9	87628.4	904940	932266	879526	32715.6	34392	45637.4	95398.7	96906.6	173633	8795.2	14972.4	23546.9	246688	193074	151337	39229.2	79760.8	114401	578715	315911	572035	70655.3	52065.4	116338	430388	256953
(M+Na)+	(+)-alpha-Pinene	Unclassified	13566.6	2930.61	6357.58	2885.37	3378.21	4459.19	1967.92	2328.99	4939.79	3553.77	4229.82	3989.5	2360.76	3067.84	3174.44	1982.52	5211.73	4022.73	5484.46	3461.13	3321.18	5200.47	4836.06	4257.03	11841.6	4650.14	4669.84	11048.7	4243.41	14411.4	6052.7	5818.25	4837.87	4103.75	4789.74	5116.89	4496.12	4526.87	5437.41	1194.45	4828.66	4907.7	5815.64	7616.3	6666.98	5010.23	6147.51
(M+H)+	(+)-Catechin	Unclassified	24894	21231.1	15159.5	120766	198717	84150.2	13988.4	15195.5	15411.9	235986	184111	472664	9768.97	10220.5	9160.2	217033	624283	140765	17281	13855.8	12539.8	174333	187361	102638	13327.6	6168.81	11577.2	10352.8	10715.5	9156.95	8250.17	9014.27	12547.8	66165.1	51988.9	26517.1	9353.27	15519.3	29222.4	231942	31617.6	58435.9	8915.06	21110	15854.8	57081.8	177811
M+	(4Z,7Z,10Z,13Z,16Z,19Z)-4,7,10,13,1 6,19-Docosahexaenoic acid	Lipids and lipid-like molecules	40093.2	19967.1	37290.3	22723.8	19772.7	26221.8	5840.84	6413.06	5006.4	15476.7	13254.7	9736.4	3641.4	3239	4441.03	6786.08	12858.4	12651.6	8859	5480.34	1969.7	12122	10464.7	5875.49	32140.1	27511.8	25399.8	40982.3	40221	37049.9	9788.16	1585.74	12083.8	26123.7	34558.9	27807.2	7611.22	10540.7	9387.82	23719	27588.8	29603.7	11107.5	11573.6	10559.7	32946.2	37178.8
(M+H-H2O)+	(R)-3-Hydroxybutyric acid	Organic acids and derivatives	6036.83	8486.98	6698.39	6459.15	10000.9	8497.66	802.709	6142.05	7756.48	6884.64	8595.58	7472.66	4633.79	4773.01	5935.46	5091.82	10790.2	4312.2	3384.06	3502.52	5976.02	4267.16	4710.22	4601.53	8312.39	6176.58	5076.46	8274.57	7772.97	7291.99	9942.06	15053.3	11888.3	11235.9	10005.9	10731.7	9903.26	8640.95	10553.5	10815	9878.57	9192.31	10532.6	8368.52	7537.66	10956.7	10617.7
(M+H-H2O)+	.alpha.-D-(+)-Talose	Unclassified	30809.8	33001.3	30914.9	7945.89	8518.53	11092	39388.3	31086.1	49967.7	9954.19	2947.37	11205	34306.4	29278.9	15194.8	8847.08	13106.5	14591.6	30975.7	29326.9	33917.1	14405.1	15743.6	16806	31942	14163.1	34966.4	3944.77	10208.1	11855.1	36785.5	43950.2	19932.2	30695.4	34964.1	36165.9	47162.3	39003.8	38075.8	31657.8	30245.6	29140.7	40023.4	36723.5	33679.9	39068.5	28292.4
(M+H)+	.beta.-Homoproline	Unclassified	11907.2	11193.9	14330.7	5265.08	2916.61	4040.08	54037.4	39730.2	41891.3	2499.99	2720.21	2519.95	47445.3	64293.1	65019.3	9446.66	10434.4	6108.31	108565	110736	80320.8	14597.7	21179.4	18520.9	11638.5	10022	11905	6355.59	6509.01	6680.31	5393.49	8114.78	7502.32	3237.36	2799.75	4134.6	12098.6	14890.6	16774	3962.96	3748.11	5530.52	31642.8	68967.4	63877.2	8016.19	6765.84
(M+H)+	1-Aminocyclohexanecarboxylic acid	Unclassified	14011.7	10536.9	18546.6	18478	14021.1	22265	8099.52	17790.3	9391.1	13116.1	2626.27	17541.1	3834.42	5949.01	4504.5	17675	2610	13383.6	8482.37	9263.39	5416.23	10412.9	16677.9	19989.3	20329.9	11099	14700.1	11249	5878.61	5467	14441	10203.7	11199.6	4537	3338.44	19058.8	19338.2	10138.2	10850.9	12450.6	13703.4	14713.5	10332.3	17415.5	16313.2	18778.6	6083.68
(M+H)+	1-Aminocyclopropanecarboxylic acid	Organic acids and derivatives	3044.51	5594.33	1725.76	5349.7	5871.75	9386.24	13639.6	6709.71	5560.49	3802.49	2163.78	2111.88	4606.47	10895.4	5912.71	3589.12	15392.8	3572.53	8042.41	5617.7	6223.61	2044.27	2795.7	4092.12	4523.11	3331.97	4478.91	22334.2	19831.1	23413.8	3053.7	6340.45	4379.13	9275.82	3074.54	2694.61	12285	7945.59	11771.7	6514.14	18160.9	5775.49	7840.2	7894.05	7085.04	5881.34	5517.69
(M+CH3COO+2H)+	1-Indanone	Unclassified	7202.83	5644.32	8282.26	7930.37	5558.09	7324.05	18579.2	1636.47	18715.1	7435.42	9762.81	5949.74	12585.8	18036.6	16324.6	16915.3	15056.8	4163.18	1634.73	699.358	9734.96	4750.42	3208.58	3517	7563.06	6781.06	7736.74	19572.2	10419.6	11254.9	21800.4	3122.54	3644.96	7725.74	11485.5	11223.1	5054.12	4246.08	3671	9130.59	9064.44	8937.62	4672.66	3765.11	3967.26	10070.8	8023.03
(M+H)+	1-Myristoyl-sn-glycero-3-phosphocholine	Unclassified	408.276	478.63	527.276	2466.86	1255.16	1398.15	820.121	369.809	909.369	1467.12	1882.02	1223.64	3328.68	950.102	2870.95	6362.29	4722.88	3474.56	4291	4327.77	4720.05	13816.5	10744.6	10419.5	553.563	619.28	590.112	1220.63	1141.32	1946.77	784.377	809.545	801.879	3027.71	2569.24	4684.93	1897.68	3136.73	3473.4	6475.96	5157.61	7809.46	3769.9	4906.32	4930.9	20872.7	16167.9
(M+H)+	1-Oleoyl-sn-glycero-3-phosphocholine	Unclassified	5171.49	9017.43	8580.38	59682.5	50944.3	51145.9	21182	16805.2	25738.6	111742	122554	97551.5	16797.6	13300.2	15482.2	62293.4	101743	65676.3	30898.3	13681.5	25538.3	247964	287704	175709	2172.39	4223.28	5228.88	62003.2	43618.3	95452.3	14184.7	11302.2	12138.9	69776.8	90358.9	112151	11600.3	16204.3	16163	52811.5	49117.3	61062.8	12050	19675.5	16282.5	206907	194652
(M+H)+	1-Palmitoyl-2-oleoyl-sn-glycero-3-phosphoethanolamine	Unclassified	1526.43	1827.89	2190.34	2680.84	2133.35	2675.35	1381.17	1045.51	965.117	11765.9	8076.24	10733.5	3587.1	2541.68	1762.25	3175.64	2240.93	10225.5	3364.61	3486.29	3448.74	13139.6	14437.7	16050.3	1601.86	1426.55	3416.81	3054.58	2158.3	2638.78	1628.38	1261.04	1580.89	6109.31	5628.4	11760.2	1032.72	3331.57	3763.6	7854.96	8806.77	14030.3	3421.08	7736.35	6174.27	13369.3	14023.6
(M+H)+	1-Palmitoyl-sn-glycero-3-phosphocholine	Unclassified	20582.8	16828.5	19735.4	162165	101708	136692	12283.3	11523	15304.8	68582.1	95054.4	59341.6	18568.4	11021.7	13718	83346.7	112523	83226.9	42102.7	19274.2	27111.7	346174	324948	175777	18981	12519.7	18960.1	101572	80396.6	132682	8100.79	6978.06	6973.19	30111.4	40826.4	43595.4	10925	19599.5	20719.2	33048	28147.6	38134.6	20478.4	30134.5	30357.2	213800	187178
(M+H-H2O)+	1-Palmitoylglycerol	Unclassified	11038.6	13240.4	22228.2	18133.1	14502	21417.5	3984.14	6462.42	6648.33	12765.5	9130.72	8845.21	6478.14	4779.39	7574.63	5044.2	11512.1	8875.66	9736.35	6695.66	5551.34	8783.31	8948.91	9942.35	19107.4	19905.4	19263.3	18061.6	25494.2	16582.6	4164.97	8921.12	5029.19	9605.39	10562.8	9756.12	7294.63	7854.51	4224.05	12093.7	9253.83	10133.3	7998.65	10079.3	5836.45	3928.77	12873.5
(M+H)+	1-Stearoyl-2-hydroxy-sn-glycero-3-phosphocholine	Unclassified	7298.9	6139.24	7345.06	67931.6	44593.2	54521.9	3606.34	3277.67	3325.16	24506.1	23096.5	19728.5	2534.13	2116.49	2612.76	9719.34	18256.1	12339.2	5291.49	2944.67	3504.14	44852.4	38943.5	23873.3	6607.92	5336.52	7091.06	29365.1	28630.5	42992.2	2107	1921.57	1947.17	9478.64	12215.8	13897.2	2202.99	2579.33	2734.44	10246.3	7600.24	11105.4	2339.75	3626.22	3201.24	46887.6	46913.9
(M+H)+	1,2-dioleoyl-sn-glycero-3-phosphatidylcholine	Unclassified	11553.3	14120.8	9681.7	48952.4	13271.4	19225.2	4715.28	3448.17	984.161	67932.3	68371.3	96844.3	5787.71	4826.09	3596.42	1731.14	16201.6	31124	4541.07	5757.69	6252.19	52071.8	43717	41285.9	5910.24	7125.25	10558.5	12361.5	10982	10745.7	4021.34	5128.24	6199.09	56628	79387.7	44615.6	6354.98	6230.98	7271.1	78704.7	33520.9	65093	5476.42	4482.9	5712.29	40053.7	20578.9
(M+H)+	1,3,5-Benzenetriol	Unclassified	4744.92	3887.48	4510.92	25543.3	12985.5	10347.5	4971.76	6918.49	3866.67	14027.6	20046.2	9986.02	4376.53	3548.91	2746.98	11075.8	21038.2	10722.8	3138.66	2895.73	3039.39	4210.38	12741.2	14027.4	6692.42	6005.79	4086.67	7401.5	6931.63	7380.76	3416.08	4122.16	4823.7	7448.97	8502.29	6858.6	4663.4	4137.22	5776.61	10460.5	5537.47	7602.5	4352.73	6201.05	4717.84	6760.93	9448.73
(M+Na)+	16-Hydroxypalmitic acid	Lipids and lipid-like molecules	104034	90281.6	120439	62469.3	26948.7	77560.5	26062.8	33541.5	29322.1	15183.2	14490.6	11821.1	30052.7	23936.1	26666.2	9411.69	16929.3	23916.3	59068.9	33356.2	49893	32674.2	24468.1	50004.5	80948.1	94703.6	84623.6	114264	116779	120531	95387.5	190766	153662	38687.3	47802.7	84093.2	78303.7	114712	91522.7	65348.9	80922.9	98287	97308	101242	93871.5	74431.2	148397
(M+CH3CN+Na)+	2'-O-methylcytidine	Unclassified	19743.3	9449.54	17165.3	49107	52482.8	29543.9	6186.08	11793	38172.3	49961.5	55589.7	49165.5	6092.84	7838.49	12721	37739.1	80474.1	78767.8	27507.1	24765.7	14124.8	105013	111396	126246	5912.35	11585.8	11817.6	17151.8	14951.6	29631	42053.4	11888.3	33054.9	12555.5	20347.9	55862	83861.4	24446.3	17590.8	53206.7	24061	70579.3	27577.5	69479.6	36176.4	55892.3	59140.2
(M+H)+	2-Hydroxyadenine	Organoheterocyclic compounds	1991.39	2234.83	952.096	615.085	566.694	1801.22	1193.49	1133.84	1045.16	1945.03	3016.27	1871.22	590.276	704.123	727.632	689.489	1096.43	819.389	720.542	1145.69	667.562	676.139	633.781	713.809	4304.27	3158.33	2588.48	2261.93	697.895	583.102	9212.18	8289.5	12813.4	10001.6	12824.1	11153.7	14670.4	10503.4	11589.8	7308.05	7447.98	10954.6	9362.7	9737.34	7685.52	6623.71	6663.32
(M+H-2H2O)+	25-hydroxyvitamin D3	Lipids and lipid-like molecules	2513.65	1464.99	2126.44	4896.92	6442.74	3711.53	2550.5	919.477	784.722	71488.4	57346.3	52615.3	847.085	2108.81	2770.99	39088.1	57576.9	52126.6	3201.56	2430.74	2617.47	57243.9	60603.9	71793.5	3238.44	3080.4	4023.51	1256.99	3552.64	2069.07	2666.83	934.102	2286.94	24199.1	23235.6	28641.4	575.097	1441.71	1267.9	21248.7	18538.3	16603.9	1540.38	3204.06	2513.24	24435.5	17643.6
(M+H)+	3-(2-Hydroxyethyl)indole	Unclassified	2543.84	2238.32	2569.84	3049.86	2139.58	3351.58	2203.96	2861.21	3310.74	2296.3	2268.51	2002.16	1634.29	1552.97	1133.57	801.117	1232.23	830.205	1334.59	1367.75	1947.15	1260.33	1149.04	1204.5	4772.27	3911.81	4821.24	5717.58	7011.44	7333.51	2717.07	4361.05	4259.98	2654.31	3077.42	3140.97	4975.45	2479.26	2590.01	2169.28	1678.77	1559.98	2803.84	2571.72	2261.3	1411.96	1750.48
(M+H)+	3-Methoxy-4-Hydroxyphenylglycol Sulfate	Benzenoids	809.187	716.806	768.881	600.1	588.794	750.071	911.695	792.377	857.778	1034.01	783.333	635.557	608	862.531	855.741	865.348	584.652	595.977	1345.68	1303.18	1293.99	821.977	893.34	1048.17	716.267	671.516	619.18	491.835	576.187	544.109	907.087	624.616	868.745	490.23	742.823	1051.3	1092.25	812.241	455.548	997.823	750.054	999.83	883.026	1034.44	787.042	924.451	620.717
(M+H)+	3-Methylhistidine	Organic acids and derivatives	3840.39	6502.69	4490.85	5103.84	8884.18	5577.37	4515.87	2013.14	4050.25	10432.9	15608.6	9505.94	1851.3	1773.87	1602.14	5081.3	4622.52	4263.26	3066.53	2205.88	3337.37	1685.05	2647.36	3417.8	4925.42	1607.74	4089.53	8992.81	4249.39	5816.27	2625.06	4404.33	1957.72	2935.25	5343.18	3056.4	4224.02	2346.97	2683.1	3667.13	1787.67	1712.43	1229.96	3847.41	2717.43	1623.11	1063.99
(M+H-H2O)+	3-Phenylpropanoic acid	Phenylpropanoids and polyketides	1206.97	916.907	1128.71	1632.74	2724.77	2812.07	2470.52	2060.5	1279.61	2085.53	2254.54	1560.88	995.455	342.398	1697.9	1796.35	2241.09	1064.15	1576.14	1597.97	1713.53	1157.15	1469.99	1166.13	1241.12	1342.12	1164.61	3656.98	3545.4	2954.17	1310.21	810.661	894.154	3031.14	3378.61	3336.62	1119.24	1798.97	732.922	2607.23	2796.68	2451.02	931.805	1195.75	419.755	1563.49	2427.58
(M-H+2K)+	3,4-Dihydroxymandelic acid	Benzenoids	6351.53	5478.91	4830.41	4547.82	3408.17	4692.21	7496.9	7262.68	5264.84	4692.37	2424.51	4191.09	3674.4	7680.54	6655.98	3381.06	3423.75	4501.36	6442.62	7193.63	6008.61	4356.24	2550.09	3884.05	4938.73	6669.45	3089.67	6096.15	5217.41	5822.5	7289.76	3213.39	3894.47	5332.01	2514.41	2494.32	5380.53	3579.95	6269.47	1908.91	5207.97	5183.02	5357.78	6915.25	5150.44	5647.93	4653.46
(M+H)+	3,5-Dimethoxy-4-hydroxycinnamic acid	Unclassified	916.26	771.77	1113.7	2504.41	2491.33	2262.55	799.492	847.803	696.6	3620.07	3270.94	2611.22	1465.17	1071.53	722.241	3879.28	5102.7	3135.46	1350.9	1235.41	1179.4	3503.44	2550.95	2118.13	690.514	1005	880.681	1142.85	1976.4	2047.31	849.692	909.577	950.288	2338.93	2312.66	2557.45	1647.16	2385.97	1326.14	4183.52	4070.28	5219.18	2395.31	1949.97	1934.5	5350.33	4856.62
(M+H-H2O)+	3.alpha.-Mannobiose	Unclassified	24914.2	24532.2	14010.8	28471	11043	12206	66095.7	61473.3	68711.7	36417.4	31844.1	35535.7	115322	82970.5	100888	97394.5	99992.1	81417.6	163056	132946	134205	117345	112251	113807	22684.6	19224.2	12018.4	25592	10014.5	20338.5	60868.2	53216.6	56900.1	41151.3	46021.2	53060.6	110881	95022.1	112319	81409.2	93703.2	114510	125732	140225	136152	138158	130995
(M+H-2H2O)+	3alpha-Hydroxy-5alpha-androstan-17-one (Androsterone)	Lipids and lipid-like molecules	2683.83	1707.58	1280.38	4503.26	2835.2	4224.57	3535.26	1841.7	6088.77	22961.6	14411.6	11318.5	4981.52	2007.96	5167.63	13892.7	10592.5	5557.06	9780.4	6562.83	4336.14	21647.6	13252.1	23024.5	1228.32	2003.83	2651.6	3257.96	5132.61	4427.38	2206.42	2938.74	2098.42	7058.75	10226	8003.67	11838.4	2908.88	3600.81	10029.8	5415.09	6141.98	3707.77	2893.38	3531.89	8318.84	6564.82
(M+H)+	4-Guanidinobutyric acid	Organic acids and derivatives	751886	891903	764329	602457	979274	874031	566574	686931	775497	657365	823834	705684	532744	511935	641770	497247	1.02987e+06	417462	352763	349916	649833	417155	473975	484267	873364	637860	550067	759956	820928	699168	1.17133e+06	1.68014e+06	1.2975e+06	1.34002e+06	1.17396e+06	1.24747e+06	1.10867e+06	983341	1.1738e+06	1.20389e+06	1.18682e+06	1.12723e+06	1.174e+06	944341	738581	1.10109e+06	1.06092e+06
(M+H)+	5-Methylcytosine	Organoheterocyclic compounds	1771.64	1930.69	1315.07	1292.69	1093.43	1610.79	2348.49	2934.59	2324.54	4349.75	2865.55	6535.69	1384.63	1433.91	1104.66	4737.25	4083.86	5108.99	1415.3	1863.77	1178.16	7592.3	4310.85	3675.33	1305.51	1093.72	1916.53	5254.71	7587.71	4745.38	2333.49	2849.43	2840.14	12381.6	13492.6	13166.8	2869.43	1907.25	2211.24	12219.5	13591.8	14480.1	2056.89	1925.82	1136.12	8575.33	13176.4
(M+H-H2O)+	Abscisic Acid (cis,trans)	Unclassified	338.846	251.75	221.666	6029.23	1738.32	6048.41	189.147	204.655	204.405	7666.65	7499.89	5998.05	2325.93	847.423	1773.94	9493.43	7527.43	6429.38	5166.3	1386.08	1229.2	7880.35	9751.23	12477.1	152.755	207.283	228.331	2089.85	1830.91	2072.61	408.997	479.377	536.63	10092.2	12535.1	13176.9	6138.91	2187.72	2650.24	8371.73	8298.02	10532.9	2277.35	4199.33	4401.66	13684.4	8753.89
(M+NH4)+	Acetyl-DL-Valine	Unclassified	2928.19	1249.15	2702.48	1568.18	1754.48	3432.01	1368.53	1389.87	3379.2	3433.44	3143.77	4067.5	1519.24	965.926	2230.73	4036.99	3238.96	3307.02	1644.32	1705.56	2659.13	2988	1928.93	1135.42	2089.66	3795.96	2361.25	3151.28	2731.36	3502.87	2716.4	2032.96	2396.25	2857.63	3616.43	5480.61	3289.21	1937.67	1826.39	4548.9	2426.17	3769.41	2818.17	1570.1	2667.92	5587.84	3397.05
(M+H)+	Acetylglycine	Organic acids and derivatives	51193.8	49462.8	48628.9	12598.5	9412.87	12652.6	85577.6	39052.7	28061.2	3658.79	1461.19	4267.52	15167.8	19747.5	41937.3	866.177	4617.76	1294.57	16413.7	31300.9	29350.7	1213.02	1564.13	2508.54	10721.3	40679.6	61992.3	35009.3	38935.3	36304.5	31246.1	26536.3	25219.1	4395.14	9241.31	6497.8	39048	46331.7	18011.3	9012.51	10029.6	12675.3	28700.1	13009	28186.5	8334.56	16145.1
(M+H)+	Adenosine	Nucleosides, nucleotides, and analogues	93759.3	164632	264145	431429	365115	283687	395608	260915	724055	92862.2	86721.8	100919	1.07856e+06	1.01341e+06	851078	62305.7	67235.7	26573.7	1.62111e+06	1.59474e+06	1.5756e+06	131513	126661	62146.1	74234.4	72817.6	156249	66191.5	57108	80655.2	67703.4	54573.8	48919.5	49499.1	91145.7	59683.1	578955	451121	481685	39028.7	44571	40015.4	520861	549918	531771	100427	71421.4
(M+H)+	Adenosine 5'-phosphosulfate (APS)	Nucleosides, nucleotides, and analogues	862.58	982.691	849.976	1174.39	1048.11	1223.77	777.389	1031.36	1077.03	1187.86	1023.66	966.203	1902.61	1429.71	939.199	747.859	663.324	533.949	2371.4	2426.14	1934.32	574.546	1421.13	1421.68	765.48	558.172	759.575	1305.47	1115.96	1150.14	714.965	698.006	709.719	1046.22	1121.4	884.411	2052.88	1359.34	1942.44	817.252	725.688	777.218	1743.9	1886.41	1971.89	1060.29	1166.91
(M+H-H2O)+	Adenosine monophosphate (AMP)	Nucleosides, nucleotides, and analogues	1168.41	838.523	887.892	3611.93	4351.63	2795.31	994.786	1161.45	1776.02	952.322	648.884	755.123	48727.3	8497.33	11947.2	69441.3	24083.4	34776.4	191957	126971	174827	298525	218875	280866	618.853	1210.98	1672.33	1806	1931.63	3074.89	6459.96	9490.12	4100.83	13425.9	13814.1	25490.3	147851	114084	134218	452061	281580	382055	257511	251024	287072	637177	637075
(M+H-H2O)+	ADP-ribose	Nucleosides, nucleotides, and analogues	1331.93	1210.51	1212.05	1894.79	1318.97	1588.76	1573.63	1637.22	2953.45	1470.33	1243.96	1295.64	3672.59	3004.48	2360.66	2464.02	2981.8	2419.42	6926.58	6552.33	6574.05	2616.07	2961.37	2880.09	812.195	819.726	906.298	1350.69	1161.57	1236.54	1721.67	1770.59	1569.44	1556.47	1536.81	1846.64	4961.1	3753.3	5162.18	3019.54	1916.37	2941.53	6147.74	6324.34	6060.88	3576.88	3691.22
(M+CH3COO+2H)+	Agomelatine	Organic acids and derivatives	926.66	1168.63	2195.46	995.295	920.28	959.369	977.129	977.769	2843.15	2022.27	1235.59	1071.59	2056.69	1340.28	917.942	9958.83	2501.4	2169.6	3021.6	3933.47	3027.9	2119.92	1626.43	4920.48	1490.97	1146.12	1411.67	1081.77	910.391	998.39	4177.94	1198.74	1554.27	897.821	1343.97	1521.08	15752.1	4195.08	2534.03	38402.5	5196.27	3837.2	4350.51	5218.85	4505.28	3643.19	2874.49
(M+H-H2O)+	alpha-D-Glucose 1-phosphate	Organic oxygen compounds	6419.47	1733.87	5661.33	7074.58	7534.88	9144.3	12036.2	7440.09	11226.9	16725.9	11456.1	15616.2	12164.2	9057.58	2710.96	42969.4	36594	14834.3	9400.28	22087.2	19776.5	11979.2	23105.2	15735.6	1582.19	1340.21	1591.64	3290.36	2845.73	3074.04	2517.82	2200.52	1979.82	5723.8	14602.5	10055.6	11317	6970.51	8574.65	11539.8	13008.7	8943.63	8955.95	9962.16	14438.3	11165.7	16423.7
(M+H)+	alpha-Linolenic acid	Lipids and lipid-like molecules	47227.8	14935.3	31373.4	12966.8	9720.75	12671.4	9002.2	10092.7	20563.1	8792.19	7734.1	8220.58	9002.35	10543.5	12401.8	8239.14	13428.9	10446.2	25445.4	19744.3	17271.3	15009.1	12824.6	9992.44	43959	47054.9	44022.6	24357.3	42541.6	28371.1	18822.4	29679.4	27568	15116	15459.5	15621.8	29880.3	25552.5	27066.1	19219.8	11770.2	14561	22201.2	33427.4	26867.1	27687.9	24354.1
(M+H)+	Anthranilic acid (Vitamin L1)	Benzenoids	329517	329464	311673	592008	420825	653152	791052	614960	669484	299809	315510	278752	567316	448837	514212	156982	61964.5	176960	562604	518686	520791	158710	148875	135696	370980	278344	264682	931790	841712	794121	470399	568950	534487	469568	353195	435038	751025	752905	975241	450576	508585	522389	960223	837822	1.16011e+06	471927	407652
M+	Arg-Met	Unclassified	3117.57	1924.3	1902.42	8564.41	7654.99	7259.92	3046.34	1314.08	3451.31	14177	3522.37	10926.6	2813.08	2996.28	3435.34	50910.5	29466.7	24070.8	2408.44	2326.68	1846.56	1869.75	10937.1	10723.5	1657.35	1820.55	3630.81	3389.57	3099.66	3363.77	2059.71	682.267	1585.79	1420.3	1795.91	2160.39	2269.57	2915.22	1352.58	1721.41	1346.09	2126.1	1697.27	1736.33	2346.07	4255.34	2345.35
M+	Arg-Tyr	Unclassified	1702.91	1667.52	3237.71	3964.18	1624.41	1638.58	3869.81	2460.36	8504.65	6002.81	2858.35	9675.16	11642.1	1284.68	1970.89	57310.2	13232.5	8685.96	5237.5	2049.59	4505.56	12321.9	6996.18	7768.3	2202.2	2727.61	2078.01	1610.56	1592.99	1644.41	1968.49	2731.11	1800.5	1980.56	4021.44	5311.74	23369	20848.5	4096.54	34930.4	7048.29	13398.9	12155.5	8608.44	7716.12	10764.1	3312.87
(M+H)+	Argininosuccinic acid	Organic acids and derivatives	1153.58	933.525	899.404	1735.78	2258.69	1775.82	3234.68	1312.71	2868.74	9552.24	2844.25	1999.08	26845.6	4927.48	8178.37	114825	20629.3	5583.1	8577.66	4855.4	17447.1	2039.68	3542.27	4248.52	943.426	646.496	918.882	877.111	607.977	1068.88	5714.63	5449.84	2809.38	5633.5	3024.06	6916.87	87064.7	52350.1	33092.2	123090	128944	93657.9	39084.3	48123.9	38574.6	25327.4	27185.8
(M+H)+	Astragalin	Phenylpropanoids and polyketides	3114.7	2570.78	1925.22	7000.21	7013.39	5932.54	1253.53	920.527	1148.57	4552.71	3593.72	2738.24	2920.48	838.413	1139.88	2536.39	7851.19	2330.71	1103.09	1159.37	1268.8	2944.92	2440.79	3008.97	3297.61	3379.11	3749.73	7901.26	4856.65	6062.05	1521.19	1148.85	1530.85	3169.46	3658.76	5724.22	924.731	917.004	1248.63	2270.17	2520.32	4969.12	1118.63	1350.65	1325.03	3480.5	2462.86
(M+H)+	Benzamide	Unclassified	26534.9	16450.8	28998.7	239003	267945	247072	19581.9	8114.49	7588.97	631597	714055	287296	8685.9	13728.5	3808.89	741280	701927	808620	8154.51	2389.83	10924	363219	451906	478253	14386.5	11962	25222	11441.9	14230.7	10728.6	8280.42	14684.8	13996.6	69936.2	63844.6	31050.3	10078.8	11505	29481.4	211779	27766.6	69021.5	16695.2	17492.6	14242.7	25547	220029
(M+H)+	Betaine	Organic acids and derivatives	6487.95	5527.13	5619.28	3116.51	2402.61	515.77	10987.7	9712.12	6559.14	2391.91	2186.69	2517.33	10673.1	7659.13	10922.3	2088.89	2122.1	1903.58	11215.1	7033.12	6688.35	2117.91	2071.11	2044.51	6654.73	6787.45	6486.36	3159.68	2909.31	3371.8	7955.09	10096.2	12206.6	5368.7	3820.46	3744.72	11880.3	11222.5	12511.9	3348.52	6042.2	3262.62	18344	10937.7	9401.28	4049.41	3653.25
M+	Choline	Organic nitrogen compounds	190349	356971	70736	40476.7	67969.8	139883	104890	106308	66754.8	37630.7	37749.6	31598.9	71592	131316	67167.4	70197.6	100463	65535.4	120909	112295	100544	66342.5	58011	70791.8	144608	115665	288514	261265	227822	329673	97317.2	147831	44886.6	92354.5	100240	59293.8	93807.8	105217	125692	54815.4	100726	64261.7	84267	115618	94985.6	79378.3	68703.7
(M+H-H2O)+	Crotonic acid	Unclassified	20348.2	22572.4	17426.7	21747.8	26187.7	33028.1	18604.1	5655.06	4686.5	20172	17066	13711.8	11487.6	6219.89	10827.2	13464.6	17785.6	8451.14	16833.9	16263.3	15848.2	9697.1	14475.6	10688.3	30803	30619.7	29023.3	36543.1	39661.1	37311.1	4446.86	8337.46	5505.97	16953.4	9482.11	15963.9	11609.1	6269.87	7866.99	8314.25	10865.8	16068.9	12965.4	15549.7	9667.91	12613	4526.06
(M+H)+	Cytidine	Nucleosides, nucleotides, and analogues	1295.01	969.478	1348.16	748.824	696.55	1034.93	477.979	741.606	900.608	947.467	646.074	722.891	662.976	1097.71	1156.92	627.925	1208.88	967.329	1234.45	952.213	1162.39	967.71	987.365	1125	1120.55	1007.11	918.732	1086.81	806.688	1031.03	1412.26	1373.58	1283.8	599.428	759.386	1116.81	1805.82	854.649	989.124	691.035	950.904	816.287	891.29	643.096	693.629	1447.14	1109.08
(M+H)+	Cytidine 5'-diphosphocholine (CDP-choline)	Nucleosides, nucleotides, and analogues	954.197	825.436	897.238	1204.24	981.192	647.957	774.814	647.785	1275.57	1124.87	953.903	884.145	1770.09	829.881	894.675	2260.95	1314.22	1097.34	923.188	1245.91	1385.39	2055.89	1722.29	2181.66	392.991	625.525	558.768	668.917	983.628	1103.45	1355.03	1120.04	905.569	1250.6	1199.49	1603.61	2779.88	2720.17	2529.63	2802.18	1794.09	1692.72	2059.5	2208.35	2189.5	2295.67	2334.47
(M+H)+	Cytosine	Organoheterocyclic compounds	1834.16	1188.67	1419.46	1434.21	906.903	984.423	1220.87	1647.41	841.115	1462.35	880.255	1677.09	1035.22	1202.02	1453.33	1764.66	1642.2	995.873	1597.9	1901.36	978.725	2404.97	2826.42	1808.73	1008.54	1882.38	1324.34	880.084	1168.99	1289.59	1095.28	1413.36	1826.68	1034.63	1585.23	1722.87	1875.92	1893.97	972.904	2713.92	1857.85	2409.48	1328.46	1999.77	1720.22	2493.27	2697.97
(M+H)+	D-Mannose-6-phosphate	Organic oxygen compounds	314.074	301.586	556.059	144.31	243.696	430.537	5039.82	301.635	606.833	1378.43	215.873	239.935	695.32	319.476	5184.85	2142.61	631.473	441.919	2541.41	1263.11	1560.68	920.853	859.405	2177.48	337.586	268.968	344.029	985.979	285.293	373.352	5110.22	8195.16	4302.37	307.334	432.648	685.2	3220.66	1800.45	5617	268.6	516.396	926.342	1904.19	1751.67	2491.23	1259.71	995.459
(M-2H+3Na)+	D-Pinitol	Organic oxygen compounds	575.056	732.015	575.607	646.663	778.194	894.008	1399.76	1045.36	1305.72	3655.5	1254.31	1205.78	6736.57	2827.4	2601.31	8483.43	5827.92	4086.84	13563	12602.3	11076.4	7180.68	8114.95	6824.76	489.623	443.928	482.109	900.023	546.46	814.963	252.974	751.475	388.26	1722.18	1305.53	2666.69	3254.69	2451.81	4526.42	3241.79	1976.05	3697.34	5164.57	9884.37	8824.68	4741.96	4053.93
(M+H-2H2O)+	D-Ribulose 1,5-bisphosphate	Unclassified	3511.05	3158.93	3818.92	3450.65	1580.91	4410.3	3648.79	4640.41	4045.5	2581.75	2213.68	3584.67	3352.4	5172.1	4629.08	1928.32	2047.52	2221.29	5372.6	2375.49	4883.72	2199.86	2300.31	1990.43	3991.44	4358.77	2356.66	3616.72	4712.1	2665.99	3137.3	4992.46	5675.52	3436.91	2681.63	3885.52	3777.21	3741.49	4624.58	3351.3	5029.1	3387.24	4043.89	5020.22	4868.05	2983.85	3299.49
(M+H)+	Daidzin	Phenylpropanoids and polyketides	2336.48	2308.71	1955.42	4003.52	3687.32	5038.93	2441.07	2783.23	3328.72	7438.27	6310.4	6877.66	1137.1	1958.47	1104.73	7389.39	13015.3	6901.55	3000.45	2075.69	2298.09	7042.34	6577.61	6110.5	1574.48	2690.43	2389.23	3579.74	3473.25	4878.25	4350.96	2407.35	3414.8	4256.75	5471.08	5052.41	3324.19	2782.43	2699.06	4624.46	3453.65	5153.29	2615.58	3388.22	1150.78	5630.42	5159.14
(M+Na)+	Desmosterol	Lipids and lipid-like molecules	8913.97	4825.03	7926.1	89476	87796.3	115646	5980.85	1662.33	5209.21	405102	324526	363996	4522.68	3202.42	4449.23	296152	617991	365136	6521.54	5723.1	4191.03	445498	426206	565526	4359.27	3866.83	5358.07	29010	34857.7	35006.2	2587.02	3147.57	3313.45	160816	166472	187298	2637.19	4217.82	6053.4	154165	134527	219231	2781.85	5130.93	2290.95	227936	138786
(M+K)+	Dihydrotachysterol	Lipids and lipid-like molecules	2487.66	1309.01	2428.72	63241.2	64760.6	48369.8	3043.59	4022.26	5067.63	51181.4	44675.6	40471.9	1519.97	2949.17	2788.81	54272.3	60505.1	35589.4	4053.03	3360.59	3707.58	37177.9	37441.1	38193.4	2433.84	1711.39	1299.72	34847.9	28469.6	29191.3	2807.9	2816.6	2256.83	15788	18586.7	20469.6	3518.49	3108.92	2917.88	21481	660.459	20713.5	3720.33	3831.13	3122.98	18870	16753.1
(M+H)+	Dimethylformamide	Unclassified	11195.3	6608.15	10194.5	2955.54	448.546	715.4	12779.7	13896.4	11555.4	1691.31	1172.01	1956.05	5242.4	5912.6	5537.89	1941.24	1495.29	2050.63	9611.79	4220.95	5514	2543.57	2232.14	2151.55	4517.41	7862.93	2496.57	1965.42	1770.43	2172.1	2717.68	12791.1	5067.63	821.496	3762.73	1455.45	6303.54	5675.28	6491.58	3151.73	4052.83	1470.32	7954.36	3901.18	5109.42	1346.47	1242.18
(M+CH3COO+2H)+	Dimethylglycine	Organic acids and derivatives	77810.1	36493.2	74760.9	6419.59	6688.63	6444.08	1280.62	2621.13	633.741	2187.06	4496.73	2673.45	3907.91	7513.68	5087.89	32088.3	28519.9	24941.4	5128.83	6379.14	7045.07	14561.8	18517.7	18069.8	60349.3	65145.1	60107.8	29886.6	29834.7	26688.6	11392	893.929	14273.4	9701.65	11350	7655.74	818.339	8405.58	800.888	4066.97	6929.51	2536.76	11224.1	10710.6	1563.9	4024.71	4147.81
(M+H)+	DL-Arginine	Organic acids and derivatives	29723.6	3642.21	20093.3	13089.3	2412.84	9786.27	18524	18840.6	18121.6	10152	7172.14	15787.4	2220.48	38000.6	38444.5	6617.94	12459.2	6245.19	17831.2	27032.5	17395.3	8785.6	1730.05	3321.13	13774.4	80968.4	7081.26	18882.7	2724.41	3036.41	39539.1	2768.24	18037.6	13692.3	7561.84	21289.6	14169.8	6411.65	4813.49	6256.14	16872.7	2356.56	6214.95	14703.3	2465.69	27212.9	7475.36
(M+H-H2O)+	DL-Indole-3-lactic acid	Unclassified	11118.6	13936.9	6749.43	7689.43	8504.41	5621.85	8266.77	20908.4	12265.4	10013.1	14955.3	9158.36	7092.36	12701.8	7816.5	42047.2	31758.8	79789.4	24447.4	30507.1	20132.9	60776.2	72198	23069	3770.55	3629.74	4854.08	3747.79	5287.59	4810.42	6384.29	10653.8	5687	24583.3	32869.2	31019.5	17130.7	11849.1	14977.6	63307.3	45855.6	52567.1	22234.8	12799.5	20314.3	58463.5	71147.8
(M+H)+	Erucamide	Unclassified	135217	90654.7	129935	380604	203873	206806	265160	111466	54672.4	294341	301378	281364	100994	45068.2	134694	4530.95	28359.3	52674.8	117422	155420	63056.5	89167.6	71491	43391.8	154696	83610	289881	464846	256168	416411	179293	244515	79590.3	166497	214630	294834	286554	137444	100920	217610	300636	345528	260753	89009.2	59943.1	370443	238308
(M+H)+	Flavin adenine dinucleotide (FAD)	Organic oxygen compounds	595.403	556.124	792.229	1148.34	1377.33	986.921	763.555	781.033	1408.1	948.833	1611.32	856.053	983.292	934.692	1264.5	1040.5	1181.31	1190.05	1296.3	1379.75	1494.1	1150.24	1262.62	1337.62	588.606	632.567	611.995	872.219	922.806	1026.46	883.742	757.16	829.472	883.399	1098.98	1323.51	1368.98	1025.57	1106.73	1358.31	754.538	1339.89	1374.49	1219.93	1368.86	1496.07	1222.53
(M+H)+	Folinic acid	Organoheterocyclic compounds	3643.75	3425.78	3190.74	4983.41	4852.86	5454.49	6776.97	6748.86	10261.6	9547.11	8116.37	8007.53	8085.61	5907.38	6275.13	13740.3	14732.1	9562.95	9623.2	8426.23	8853.48	9006.94	8541.23	8862.64	3768.81	3318.26	3667.17	4637.65	4722.99	5273.72	6284.74	4502.32	5270.34	8498.68	10182	10630.6	9533.47	6621.04	6619.09	14863.9	13335.4	13750.1	8617	7523.22	7563.04	16110.9	13972.6
(M+K)+	Ginkgolide J	Unclassified	663.18	562.571	615.099	990.545	873.23	677.038	551.803	1239.37	2607.04	2241.58	1233.13	1972.7	2631.48	3140.24	2650.14	3456.59	2256.9	2874.42	2908.04	4136.52	3526.59	4119.26	4004.98	5212.76	547.634	621.192	575.702	708.108	642.209	754.343	4301.06	3539.02	3202.86	2161.42	2881.67	4443.05	6644.86	4103.35	4237.77	3832.09	2611.24	2468.06	4809.24	6563.72	5506.18	2996.62	3825.5
(M+H-H2O)+	Gluconolactone	Unclassified	37788.9	35573.4	25462.7	9585.49	10813.8	11031.4	66768.2	37166.8	106133	3353.32	2202.05	3717.61	18069.6	41016.7	42799.2	4538.29	3590.04	3152.35	20873.4	39200.9	41118	2319.06	5359.35	4405.18	27210.5	47837	46887.2	12318.8	21235.7	21907.8	70076.5	30900.5	47484.4	10273.9	10330.3	11776.9	34829.9	27194.2	28457.2	7741.03	13799.6	28432.6	36353.7	41364.9	31547.2	14432.4	14247.9
(M+H)+	Guanidine	Organic nitrogen compounds	5541.07	9496.24	2968.27	2767.7	3314.74	6356.55	19920.8	8762.79	4372.72	2282.83	1776.75	4384.54	22640.8	11553.7	9839.02	7243.13	11737.8	3764.15	13717.9	11336.6	15485.9	1947.92	4511.42	2066.86	11217.5	5728.59	6431.32	6068.89	7969.8	4274.45	8464.12	12538.2	8516.61	28357.1	19148.7	4491.22	6762.03	12722.3	19622.5	4098.24	23002.3	10550.7	13643.6	7873.04	14460.1	8250.27	10671.4
(M+H-H2O)+	His-Pro	Unclassified	5357.11	3899.99	4410.44	4414.49	3993.36	4894.06	7675.24	7491.11	9992.26	7738.19	7958.12	6629.88	7691.21	7750.17	8366.48	13639.4	13407	7383.09	9825.24	9125.63	9218.89	7214.71	7484.43	9929.65	5146.86	5210.8	7501.29	8785.44	7618.55	8055.9	6875.65	7692.35	7597.76	9692.71	9340.87	10064.5	12942.5	9928.45	10572.6	11604.7	8800.91	9864.45	8717.24	7667.52	7620.4	11221.5	9522.8
(M+CH3CN+Na)+	His-Thr	Unclassified	5413.35	17123.3	7450.46	2362.47	2442.51	475.519	245259	102015	126745	2493.72	2476.72	2116.25	19957	23320.6	67543.8	2674.85	2046.37	953.741	29750.1	18514.8	27474.1	562.131	951.041	1425.49	3607.3	2592.27	3436.28	2932.03	1061.86	2396.13	3018.87	4507.43	3918.83	1660.54	2349.8	1155.33	2321.84	2128.46	2117.87	2020.78	1847.33	1854.48	3086.78	2440.17	2610.09	1041.09	1598.46
(M+H-H2O)+	Homogentisic acid	Benzenoids	24026.1	13139.7	12752.5	88461.1	86053.2	68694.8	13163.8	12411.1	7343.5	203523	141315	74243.9	2684.29	7159.24	5945.76	74110.3	287394	104586	5049.37	4695.74	6660.15	72020.5	60849.7	95417.6	7941.79	7861.78	10371.9	9258.26	2810.97	3883.82	4302.98	7322.65	12833.9	20809.7	29656.4	9880.24	13114.2	10766.8	16523.8	65542.7	10161.4	24216.6	10087.4	11999.2	10755.1	22256.3	70130.2
(M+H)+	Hydroxyproline	Organic acids and derivatives	15330	15114.8	11137.3	16241.4	16476.3	12602.4	35721.1	28858.4	55459.4	46622.8	39635.2	36248.9	49172.7	35869.6	42116.4	79089.5	52069.1	56487.4	78020	62507.2	68121.9	50424.9	54216.4	69628.6	7207.36	7084.31	6961.68	9653.31	8491.92	7815.98	17715.5	17518.1	16800.6	15926.1	18981.6	21473.2	33933.1	27999.1	28087	33986.8	23631.3	29457.8	36707.7	44888.8	41701.1	32234.3	32887.6
(M+H)+	Hyperoside	Phenylpropanoids and polyketides	4757.92	3988.78	3118.36	88594.6	60240	46657.8	2257.01	1600.69	1973.84	15624.7	21407.6	30941.7	1058.28	4406.29	2844.98	17184.2	20868	26708.9	4018.5	2901.35	1378.68	19699.3	15790	17948.2	6838.26	3524.29	3437.66	52544.6	135452	156625	2739.01	1755.51	4064.67	22011.2	19474.2	19392.3	3268.15	2417.71	4599.02	18370.5	12950.9	17022.4	2991.83	3815.79	3687.11	34256.5	17005.6
(M+H)+	Hypoxanthine	Organoheterocyclic compounds	540.497	481.763	329.858	394.858	625.018	328.355	391.619	377.245	468.463	213.715	250.546	352.199	494.779	316.883	506.469	294.512	333.487	273.171	1893.41	1105.85	1134.91	482.669	316.538	517.553	947.98	696.346	953.611	560.274	308.31	155.834	6783.27	8886.2	15483.3	2038.6	3774.76	2527.56	398253	380476	407971	55785.7	95572.7	72520.7	381376	484172	444747	56771.4	135237
(M+H)+	Indole-3-carboxylic acid	Organoheterocyclic compounds	3646.42	3646.79	3960.32	2176.42	2628.85	3119.31	2915.11	5732.98	11959.1	2642.35	4319.63	4318.07	3542.09	3406.75	2853.73	6327.73	5296.16	3975.35	2967.65	3664.53	4193.73	2441.67	3784.61	3698.23	7741.93	3769.21	6577.59	4351.27	3483.46	3833.02	5968.86	10549.8	9761.82	7146.72	7672.93	7839.14	11247.7	6990.29	7339.63	6648.79	6267.36	5649.63	4489.51	4760.81	6391.86	6896.3	4928.03
(M+H)+	Jasmine lactone	Unclassified	3031.46	3140.35	3388.29	2464.2	1531.19	2926.17	2477.54	4090.87	4266.51	1247.22	1212.68	1996.73	2220.3	1560.64	2022.38	854.942	4105.5	2407.82	2746.19	1760.45	3218.02	2316.44	3535.51	2680.95	3795.01	3590.23	7743.52	7761.39	5378.74	7273.68	6840.62	7325.55	9816.75	4783.39	5810.93	4477.42	8597.55	4641.04	3972.24	3445.38	3151.08	3370.47	6178.11	6070.36	4663.61	3912.16	4830.9
(M+H)+	Kaempferol	Phenylpropanoids and polyketides	7238.08	4670.31	4168.57	8436.58	8979.2	6504.56	1719.55	2363.06	2448.81	3863.13	4829.74	3020.92	1675.43	2013.2	2951.33	4432.49	6171.29	3589.92	1863.01	1186.04	1327.58	4429.74	4757.73	8288.99	6291.36	5460.41	7648.99	5656.49	4695.21	6338.38	3177.89	3319.58	2963.13	4829.92	4686.07	5940.27	2411.85	2093.55	3061.29	4416.68	4125.36	5702.29	2513.43	2796.42	6457.73	7191.84	2923.84
(M+H)+	Kaempferol 3-O-rutinoside	Unclassified	15219.8	8612.08	6707.43	75223.9	86214.3	59160	2386.6	2150.61	2959.63	23718.3	27899.6	17053.1	1845.7	1541.76	1288.19	18509.2	34468.4	12316.6	2640.69	1911.64	1800.78	16542.4	17611.4	13424.7	14953.5	13066.8	16274.7	72542.9	49765.3	75921.9	4009.46	3142.61	3396.91	21003.2	23196.1	27501.5	4432.73	3333.02	3828.93	18514.4	14730.1	24015.3	4654.23	4932.43	3996.04	18255.5	16068.8
(M+H)+	L-Arginine	Organic acids and derivatives	69442.2	44448.3	209589	72582.7	11446.1	19126.7	853725	218230	2.09986e+06	73313	70174.2	78684.2	42028.8	895762	21755	470438	961609	3.36452e+06	940363	114328	171633	364253	10514.3	2.5556e+06	13409.6	30035.1	255017	176374	11224.7	25809.5	2.09473e+06	268905	1.17899e+06	221416	120785	145824	2.8701e+06	163851	254718	393904	394118	1.34081e+06	77491.3	278831	72398.6	1.59998e+06	785569
(M+H)+	L-Aspartate	Organic acids and derivatives	5112.8	8142.18	4424.01	1256.01	3009.42	2449.08	15251.4	18045.8	22157.2	17822.1	10211.6	12616.3	15320.9	26524.5	24463.9	15947.6	26455.7	13575.2	19333.1	15827.2	20835.2	6491.5	9180.54	10690.3	3498.92	3530.21	4033.1	1622.49	1435.34	1802.04	15564.8	15498	13651.9	15938.5	10113.3	12479.6	23493.4	20418.4	21067.2	10298.5	19591.8	14211.8	18389.1	22057	16698.5	19316.9	15469.4
(M+H-H2O)+	L-Citrulline	Organic acids and derivatives	2574.63	1332.77	341.454	3286.76	1506.91	1523.84	20464.9	1590.77	47669.1	54347.5	2834.53	20502.9	14544.8	1945.95	1616.91	39940.8	23921.1	58321.3	6593.12	2432.25	42435	7873.51	1829.34	8257.87	1294.14	3240.85	2932.6	3615.58	1686.48	1881.45	63375.4	32602.9	1837.46	1445.1	1856.28	13241.7	244.667	6844.93	31524.5	14809.7	14005.1	84701.2	25357.9	46429	19888.3	42457.3	1615.85
(M+H)+	L-Histidine	Organic acids and derivatives	3997.4	2304.53	7044.42	2298.44	2705.46	3377.09	2986.94	3005.6	9048.91	8050.21	5915.52	5413.36	6544.13	4637.41	4657.45	7634.11	4573.7	6664.07	6782.32	8637.35	11038.5	3862.47	4680.05	8185.81	3356.77	6164.25	11281.8	7854.59	3251.7	5218.71	7804.76	22181.9	5660.1	4090.62	5845.83	5425.78	24265	7336.58	6239.52	16082.4	4839.95	19211.4	8452.93	10171.5	14992.9	6277.93	15702
(M+H-H2O)+	L-Lysine	Organic acids and derivatives	2937.47	2055.68	2715.61	4547.58	3148.61	4870.15	6539.56	4846.35	3933.32	3631.94	3242.06	2895.24	3715.01	3902.35	4077.82	2186.73	2036.59	2525.65	3555.92	4557.31	3632.21	1690.53	2892.29	1689.13	3485.41	4623.2	4693.78	5206.45	6811.96	6649.5	4627.19	4203.84	4877.85	7688.61	4240.88	7956.25	5015.93	5324.4	4389.39	3499.04	3964.1	3951.15	3801.17	7624.65	6437.53	3919.36	3192.11
(M+H)+	L-NG-Monomethylarginine	Unclassified	8200.61	6822.5	11849.1	6943.25	14210.4	13848.1	8910.42	6393.84	40078.7	51497.5	14096.1	29358.9	29258.4	2811.7	1704.27	24029.7	47106.4	117503	35324.4	605.088	74953.7	39391.6	23602	115489	6696.82	15530.5	45413.1	17716.1	8923.61	24700	23569.3	21421.4	16178.3	2565.33	11175.6	45247.6	62158.4	8684.52	35641	751.795	18343.6	31323.2	18335.4	35006.7	7872.47	21021.5	7081.31
(M+CH3CN+H)+	L-Pipecolic acid	Organic acids and derivatives	1650.72	1932.77	1515.14	802.078	1108.95	2364.72	868.111	1165.64	1021.58	719.954	967.042	1125.39	2062.58	1235.44	1468.95	1891.08	3980.26	2272.68	4070.42	3326.23	2676.98	6539.36	7025.81	7845.4	2070.75	1565.51	2180.61	2335.2	1726.69	2857.49	929.586	1218.59	820.418	1647.09	1176.85	991.573	916.459	1048.57	789.959	3343.61	1535.09	2538.73	2344.3	2813.96	2263.93	3961.39	2859.67
(M+H)+	L-Serine	Organic acids and derivatives	2852.43	2344.84	3091.14	1562.24	2308.66	6253.37	5842.15	5297.93	2375.77	5086.01	4411.29	3208.46	2603.49	3486.98	2787.2	2048.66	4945.47	1953.31	1803.62	3696.53	4186.6	1418.19	1873.27	1777.59	2524.27	2592.76	2748.38	5067.96	4516.53	4255.55	1666.12	4067.39	3000.94	4969.52	3477.81	2286.32	4801.67	3658.07	3044.85	2475.75	4210.13	1630.86	3554.45	3409.64	2869.34	2242.12	3160.03
(M+H-H2O)+	Linalool oxide	Unclassified	10050.4	10120.5	8608.94	129994	101453	84728.3	6366.45	9740.52	3631.16	12981.8	36458.4	13406.6	2830.87	5257.81	3094.84	4992.46	10209.3	17586.1	2818.75	3639.54	2471.6	3588.61	4718.46	3049.28	14309	8667.05	11801.4	101854	82624	97467.6	6437.45	8100.18	8975.34	8848.82	10627.4	13150.2	8403.26	9144.95	7177.04	6949	6335.04	8308.2	7070.49	7417.89	7791.64	10307.3	7238.91
(M+H)+	Lys-Pro	Unclassified	996.705	1620.79	613.083	1995.26	1970.24	1539.04	1367.23	691.879	1634.41	4477.99	3809.4	3519.38	1719.62	1590.26	1561.93	6770.65	6966.24	8044.08	1112.71	1486.66	1678.56	5179.45	5145.96	5901.23	931.265	1012.2	1460.4	2220.51	1314.22	1826.28	1472.39	1513.75	1676.73	1336.52	2412.91	3955.51	2170.95	1779.13	1114.77	7022	2401.63	6118.79	1315.41	1377.42	1884.93	4549.28	3788.69
(M+NH4)+	Maltotriose	Organic oxygen compounds	126.288	77.3466	81.5466	515.254	374.705	389.392	8749.09	7886.75	15408.2	3712.4	4641.67	3590.67	74432	55220.7	45549.2	86393.1	60046.5	41136	142965	113656	118996	86075.3	77951.2	87315.1	151.709	119.114	144.947	404.207	363.467	598.707	9041.01	11985.7	10299.3	5312.44	6307.97	7600.88	85813.4	70318.1	83328.8	49053.9	46424.5	69489.5	106650	133350	125382	86238.1	89790.6
(M+NH4)+	Malvidin 3-O-glucoside cation	Unclassified	3401.42	1281.7	3815.96	10096	6586.1	3529.89	669.751	1772.9	3957.59	11304.4	10228	11694.9	1944.41	1417.87	1544.03	14077.3	8081.41	17030.2	5583.26	4661.48	3088.29	25503.7	22914.5	26102	1493.23	4177.27	2402.58	2708	2739.35	9172.43	2291.61	890.817	1376.55	1782.42	4170.58	19788.9	5178.19	2274.35	1862.63	26813.7	7160.97	10423.5	3957.62	5561.85	5300.67	10754.6	10775.8
(M+H-H2O)+	Maslinic Acid	Unclassified	3964.81	2440.64	3199.55	106812	252062	109919	10599.1	5772.06	7503.14	2.63111e+06	2.26188e+06	1.98631e+06	2506.66	1972.93	2863.18	2.59425e+06	2.94489e+06	2.65897e+06	7209.77	3448.44	6193.91	2.45375e+06	2.58479e+06	3.56093e+06	1632.96	2483.45	2318.92	54698.1	39345.7	76449.6	3301.03	4096.06	5338.51	1.34401e+06	1.34205e+06	1.75064e+06	9096.58	21053.9	21192.7	1.12762e+06	836456	1.15084e+06	6107.04	16145.1	8674.9	1.18819e+06	740263
(M+H)+	Methoprene (S)	Unclassified	1399.45	2111.21	2510.63	4369.03	3048.97	5027.41	10708.7	8620	3926.67	8136.17	3824.52	4342.14	10372.2	16397.5	15318.9	11993.4	31692.6	20266.3	25988	15166.3	15103	13176.1	13388.2	16639.7	588.093	503.134	522.264	2283.21	1964.67	2327.23	5469.5	7125.58	11812.3	7982.78	8372.39	15645.9	11737.5	23562	21212.2	35016	22785.1	29712.4	31505	29140.5	26422.4	28060	27024.2
(M+H)+	Methyl 4-hydroxybenzoate	Unclassified	5697.45	5102.46	4024.01	19793.5	31544.7	25438.2	7577.06	12779.6	5482.32	43948.3	37915.4	23147.2	2287.2	2314.14	3212.34	36716.7	54951.3	29513.2	878.88	806.399	3931.5	14366.8	27483.9	26097.3	1166.99	1277.16	2145.63	2977.17	2361.66	3818.53	2176.89	7826.65	3544.92	6377.6	5718.87	4186.67	3750.22	1681.76	1916.57	14028.3	3098.83	8706.45	1626.71	1902.4	7369.27	6735.82	12333.6
(M+H-H2O)+	MG(18:2(9Z,12Z)/0:0/0:0)[rac]	Unclassified	53157.7	24192.8	59941.8	54947.2	55937.5	58817.9	28659.4	27728.1	19319.3	25219.4	41402.8	18303.2	26700.3	25922.8	16947.4	12473	32830.4	38366.1	37541.7	38361.7	26534.2	36830.3	38563.1	49167	53716.2	122353	58890	34832	80060.5	79692	15429.7	28798.4	31595.6	25669.8	25116.8	25077.5	20835.5	34025.6	37647.1	24504.1	27383.1	31858.9	32257.2	32255.2	31702.8	32271.1	27649.4
(M+H-H2O)+	N-Acetyl-D-Glucosamine 6-Phosphate	Organic oxygen compounds	1905.49	1782.4	4044.97	436.984	1091.02	1108.49	1582.47	896.772	480.92	1310.39	1092.93	1210.05	3842.59	2306.54	2238.7	3772.87	3144.19	2583.38	4038.44	4011.62	3769.69	2406.11	3024.21	2586.28	1013.99	1198.12	1172.75	1086.58	940.3	817.754	585.362	1085.09	1689.58	1548.23	1356.33	2069.64	4745.18	3877.77	5151.06	3454.12	2740.9	3954.37	4700.62	6242.82	5965.22	4301.31	3713.24
(M+H)+	N6-methyladenosine	Nucleosides, nucleotides, and analogues	4516.5	2591.67	3747.38	9388.12	11757.4	7542.53	2248.5	2305.87	3373.49	10812.6	13002.5	8907.21	4671.62	4970.55	3340.48	12263.6	11361.4	12514.4	13042.4	11534.7	8653	18019.8	19383.8	22893.1	3105.04	4349.25	3717.99	4272.02	5453.9	5569.78	3198.17	2478.83	2089.46	4808.92	4921.91	6732.39	3872.82	3043.41	2981.26	7621.09	4594.02	7975.19	3340.54	5588.61	4524.3	7025.45	6150.33
(M+H)+	N6,N6,N6-Trimethyl-L-lysine	Organic acids and derivatives	10451.4	13092	25057.5	6878.14	14771.1	11486.7	44545.4	6271.87	47312.1	63148.3	30165.2	32217.2	59811.8	6561.14	5804.19	11825	75708.4	84652.1	106033	100391	135362	31197.5	43571.1	77391.7	19554.2	11133.5	40443.5	33065.6	12295.3	34270	61456.3	47459.6	38807.6	6307.86	24774	49117.2	143032	96890	66090.2	10301.9	102820	114316	73161.1	102152	94914.9	70909	88151.1
(M+H)+	Narcissin	Unclassified	748.319	706.897	690.289	12051.4	10236.4	8718.54	298.508	426.029	637.861	2624.27	4956.21	2987.51	163.932	315.597	246.4	3616.15	5964.51	1573.97	513.085	456.153	313.066	3519.83	2474.79	1917.42	2251.24	3196.88	2236.19	17572.6	14016.9	15065.1	739.334	605.079	757.077	4251.78	4474.1	5400.37	739.213	765.397	768.038	3051.87	3478.81	4898.58	1133.92	854.008	780.177	3817.8	3670.47
(M+H)+	Nicotinamide adenine dinucleotide (NAD)	Nucleosides, nucleotides, and analogues	3480.91	3794.53	3469.35	6262.76	5590.07	5117.81	4838.15	4531.72	10209.8	4952.01	4416.48	4086.15	13599.5	9437.94	7820.66	11287.1	10492.3	7371.97	29263	24645.7	28611.8	11798	10871.7	11208.4	2484.72	2173.82	2440.12	4389.2	4021.24	3293.48	5779.53	5528.42	4877.64	4714.11	4767.19	5909.91	18006.2	14481.5	19544.3	13042	6140.61	9744.22	25788.2	24768.8	28198.4	12396.2	13801.3
(M+H)+	Nicotinate	Organoheterocyclic compounds	4903.5	8274.69	3721.91	4086.81	4090.67	7228.45	1158.88	1044.56	3536.07	1669.69	1419.17	1022.55	1461.6	819.858	1699.07	2068.25	2231	2587.97	2015.65	2447.75	1876.66	1447.63	1870.26	3039.14	2000.47	1492.09	2250.12	5783.54	5081.49	4867.24	3666.39	3729.39	4307.41	3604.09	5412.71	5328.33	4497.7	4139.36	4056.63	6913.82	9801.07	8224.09	4191.25	4381.51	3558.52	6685.38	7989.3
(M+H)+	Palmitoyl ethanolamide	Unclassified	20181.1	48887.9	5625.25	7976.3	21982.2	19611.8	21493.7	32688.6	48261.7	46877.8	18941	22320.6	16754.6	28211.6	3081.22	25038.5	12775	4203.96	33751	16584.2	19061.4	28537.9	16697.8	1185.35	23849.9	41655.6	23106.7	25099.7	5888.12	25441	7575.86	5881.33	64776.4	19324.2	11329.9	32818.4	97143.2	28532.2	18367.3	16594.5	14260.9	10959.5	25447.1	9102.31	24058	11974.4	17244.9
(M-H+2Na)+	PC(16:0/16:0)	Lipids and lipid-like molecules	9897.47	9458.26	13662.8	187184	59232.4	111138	4441.12	3973.81	1008.29	243484	255256	494663	10835.7	9952.26	5054.4	32892.6	127059	294316	13352.9	18620.5	16875.6	220643	198364	387428	6824.16	4829.68	5207.62	29203.4	56421.7	60019.4	2839.01	1764.77	3993.72	134257	73722.5	89796.3	2965.76	8893.37	14147.9	37520.5	55798.5	55539.4	8221.11	26043.1	15123.6	44305.3	42799.4
(M+NH4)+	Pelargonidin 3-glucoside cation	Unclassified	3934.08	2612.88	3005.53	5529.06	4473.72	4378.14	2129.34	2283.49	2812.54	5683.29	5552.94	4807.39	4222.08	4298.73	2209.27	8898.39	15986.2	10283.4	11174.1	8260.12	7026.7	16001.7	15916	14144.4	1515.94	1582.47	1269.47	2370.25	2342.36	2985.22	3101.24	2536.73	2967.58	7998.98	12816.8	11563.5	4685.57	4411.98	5166.02	13486.9	10861.4	17361.5	6134.38	7711.94	8255.91	19386.7	22420.4
(M+CH3CN+Na)+	Pentetrazole	Unclassified	14686.8	15292.5	13097.1	18285	14096.5	22361.2	3143.6	2860.96	2993.39	4793.88	2892.44	2403.15	814.648	1068.78	679.04	693.235	635.734	831.151	804.63	1140.67	921.832	608.829	631.029	700.066	23413.6	20845.4	26217.3	43927.8	68763.8	27305.4	3660.8	2320.62	3168.65	6717.19	6046	7253.94	3427.96	2028.12	2463.02	2249.41	1965.16	1891.97	2054.01	3077.62	2277.21	1624.56	1267.51
M+	Peonidin 3-galactoside cation	Unclassified	3979.64	2566.41	2502.46	54137.8	36104.1	46903.5	731.52	1640.29	3017.62	67669.7	60841.9	39434.9	3261.43	2419.26	2365.11	149253	186589	66762.1	1346.86	1643.73	2485.43	52497.2	51127	55675	7755.92	6475.63	11225.9	54052	52719	52376.6	2081.55	1532.28	1900.42	53046.4	48521.1	66280.8	3262.33	2156.92	5927.9	46666	30008.5	52476.2	3151.62	5693.49	2984.95	56975.1	43264.4
(M+H-H2O)+	Perillyl alcohol	Unclassified	7010.54	7601.3	7110.78	19814.1	13105.2	17335	20073.1	18937.3	27764.4	17442.5	16444.1	14694.8	13035	16889.7	11210.6	19557.1	32633.9	12570.5	10400.8	10639.1	9831.22	11101	10110.8	9498.84	5564.95	3316.09	4560.19	15358.2	19087.8	22421.2	7134.18	12823.9	12007.9	15231.1	16357.7	20953.1	16173.4	12058.9	10248.7	11100	14454.7	12722.7	9449.05	11770.2	9822.59	12690.5	10317
(M+Na)+	Phe-Tyr	Unclassified	3814.13	1840.85	1331.14	1413.37	8456.6	7927.49	2062.63	912.233	4062.83	6135.19	5421.21	5634.6	2781.5	2705.5	2707.94	6819.64	8318.94	5142.17	1446.39	3373.56	3274.84	3513.13	3265.26	4997.86	2742.8	1322.68	4485.56	10153.8	10981	5411.71	2687.76	1840.91	2824.09	7399.09	8660.31	8736.64	4414.87	2830.87	2172.53	6019.83	6111.82	6003.46	1868.94	1367.32	1069.4	7138.13	6669.05
(M+H)+	Phenylacetic acid	Unclassified	2915.74	2008.47	2283.55	3371.26	3389.6	3735.3	2318.39	2252.41	1766.64	5958.01	11773.6	6096.66	1264.06	1660.45	1460.46	5727.48	8074.28	4673.45	1967.91	2057.87	958.878	4359.35	4768.85	4141.58	3928.04	2957.68	3042.36	5675.36	5955.69	5373.51	1936.05	2331.52	2542.64	7638.47	7006.98	6547.64	1919.63	2009.3	2652.52	4565.74	6854.74	6033.67	2059.36	1572.73	2342.23	7789.87	5080.49
(M+H)+	Phytosphingosine	Organic nitrogen compounds	229648	110550	230154	345713	215362	342679	50660	46692.6	13638.2	84557.5	156939	86606.8	188849	143582	125250	23139.1	71967.6	96251.1	205009	137014	208596	84861.6	93244.5	106550	128282	103965	128668	100102	92846	70973.1	70856.9	76996.3	77882.3	72922.7	87698.6	84272.9	71218.7	140322	151816	36899.4	29313.6	67186.4	161689	79026.9	149505	74334.6	37064.5
(M+H)+	Pro-Arg	Unclassified	1158.69	1220.73	1364.77	2771.89	2101.06	1793.74	1218.61	944.237	1547.02	2259.66	3411.62	2097.13	1330.04	915.313	1151.86	3640.75	3759.9	3325.44	1686.17	1180.86	1432.41	2318.47	2599.37	3527.38	1274.08	1629.79	2218.67	1856.23	1483.83	1005.74	1308.4	967.465	1170.4	1212.95	710.355	2038.47	1803.41	1007.54	1046.24	4536.11	1062.86	4567.88	586.055	1320.47	803.703	2667.18	1199.89
(M+H)+	Pyridoxine	Unclassified	2651.65	3829.21	2271.21	3412	4011.57	2695.33	2451.22	2171.75	2513.88	3182.13	624.543	2241.98	4812.78	2668.75	2542.47	644.741	3912.79	2317.5	13927	12796.6	12456.3	3045.94	1477.7	3657.16	2559.31	1678.44	3079.87	2339.72	884.03	3501.15	2346.48	3060.92	3952.28	1754.28	2144.92	2170.88	10216.5	11541	13201.1	1302.47	2129.65	1316.05	13174.5	12484.6	14442.6	1468.34	1955.34
(M+H)+	Quercetin	Phenylpropanoids and polyketides	18799	5900.34	9226.98	369202	227900	805485	12055.2	5180.06	2880.72	185458	150356	97452.3	4322.89	9275.21	7932.05	153629	293786	118763	12886	5068.44	825.354	152259	131679	143012	10326	16113.5	14980.1	388921	323794	476728	5761.15	3381.52	12080.9	155504	139252	140653	4058.99	421.724	9696.68	100083	89682.3	163966	3381.17	6135.02	8454.49	97129.3	97798.8
(M+H)+	Quercetin 3'-methyl ether	Unclassified	2653.59	2326.76	2113.7	9875.75	6016.66	5678.72	734.926	764.904	2048.65	4965.17	3594.13	3929.03	2610.25	1764.35	3274.36	7885.46	12417.7	4141.99	3628.09	1596.01	2929.72	5065.22	3780.2	3532.16	2405.39	2133.6	499.221	8566.86	6339.78	8022.36	3790.26	1690.33	2316.73	5121.12	6561.72	7555.47	5845.07	3126.64	1814.24	5375.5	5546.46	6321.05	3288.7	1856.55	1218.86	7510.59	6555.25
(M+H)+	Quinone	Organic oxygen compounds	2002.76	1576.45	1648.61	1693.05	2320.67	2918.42	1302.74	1175.27	1666.83	3089.33	2512.81	1963.27	3680.77	2918.2	1878.56	4824.06	3883.2	3505.58	5570.17	5318.47	6111.28	2161.73	1766.92	1497.83	1418.12	1600.28	953.64	1531.71	2118.16	1856.66	1405.68	1242.95	1336.29	1883.61	1733.34	2345.92	6224.77	5124.13	1696	2492.65	1317.37	2104.44	6522.74	7482.08	6915.26	1995.76	1853.99
(M+CH3COO+2H)+	Resorcinol	Unclassified	1580.7	2588.2	1411.97	3489.38	3942.44	2677.57	2326.59	3483.96	4305.88	3694.72	2291.93	2949.17	1947.14	1257.48	1836.43	5385.75	7510.01	3541.98	2656	2626.33	1650.79	3584.84	2772.19	2677.58	907.987	511.316	914.26	973.588	813.08	763.502	1551.63	1940.91	1979.24	4022.69	3907.57	4350.76	2897.84	2142.34	3090.51	13893.1	9419.22	9463.92	2587.63	2857.51	2917.23	12178.4	17716.9
(M+H)+	Resveratrol	Phenylpropanoids and polyketides	699.033	862.211	573.253	4650.16	4745.8	5168.19	656.088	740.222	724.969	7106.62	6425.5	5389.3	553.293	808.211	506.118	7336.46	7899.68	5164.22	734.658	869.178	837.475	4035.29	4010.64	4810.79	974.098	502.928	1012.44	2249.47	3248.67	3375.63	717.593	532.442	619.439	3573.42	3168.01	3725.35	904.544	586.353	978.122	1994.5	2158.67	3059.51	568.499	1071.47	667.755	2595.21	1559.24
(M+H-H2O)+	Sapindoside A	Unclassified	1993.29	2661.26	2608.52	5.52985e+06	3.98189e+06	5.38653e+06	2273.45	2791.25	1951.31	2.85634e+06	3.7315e+06	2.11893e+06	2786.98	1679.5	963.657	2.04623e+06	3.13059e+06	1.29079e+06	2835.75	1826.86	3588.84	1.17497e+06	1.46696e+06	1.21921e+06	2257.76	3890.3	5641.07	1.03597e+06	927013	1.13864e+06	2496.98	2521.08	1306.14	291717	372057	413175	2016.84	5077.81	3800.07	148163	123850	255917	2297.84	3767.86	5569.25	160791	162302
(M+H)+	Sebacic acid	Lipids and lipid-like molecules	2684.85	2092.23	2171.37	22965.8	18915	15631.2	1386.01	1521.95	2181.84	9850.71	9362.4	8189.67	2235.19	2677.81	3361.78	9389.99	9794.81	6306.3	1042.4	2687.02	2710.21	5878.19	7160.74	6932.01	2831.74	2273.18	2795.66	13594.2	12838	15415.9	1568.04	1398.75	1677.53	7516.85	8954.95	9854.64	1584.79	1215.02	1413.5	9494.48	6398.03	8481.08	1917.73	2117.78	1531.79	7042.28	5830.08
(M+H)+	Sphinganine	Organic nitrogen compounds	9647.55	5780.08	7808.2	20873.1	15642.8	22191.8	5916.02	5436.8	1810.05	5998.96	13299.7	5530.6	2801.61	4236.81	7352.03	366.707	6647.66	4771.14	8050.5	4807.79	3685.44	4548.73	4628.04	5444.84	5928.22	9293.07	8437.21	10142.1	10747.6	9835.38	5439.52	5058.55	6380.4	4338.16	5084.39	6336.54	7717.21	5088.42	6047.17	3004.59	3772.85	4302.41	4653.46	4787.29	5143.73	5374.42	3898.51
M+	Thiamine	Organoheterocyclic compounds	79148.7	91319.2	81938.4	24477.5	19028.4	27428.2	83015.3	43469.4	134978	15260.6	13962.4	17794.2	118189	33472.1	42389.5	36383.3	32380.2	26290.5	66310.1	34268.9	119256	7950.08	8943.12	15370.4	83020.2	72368.1	56194.7	31144.4	24736.3	20861.5	46852.8	73172	39396.4	6190.1	8854.52	13213.6	41246	53899.8	53083	14467.1	5826.58	9041.27	82716.1	48968.4	82244.8	9129.27	6393.89
(M+H)+	Thr-Glu	Unclassified	11024.2	4034.86	10916.5	42032	12272	16768.5	3980.5	1625.64	2539.86	4255.75	3342.71	1493.04	2926.84	2201.54	1555.62	5293.8	4896.55	1826.19	16432.7	15034.7	3042.32	1866.95	2012.15	6621.74	9205.43	2874.98	9011.58	19396	22215.3	21538.3	5569.22	3745.81	2378.53	4767.47	5567.92	4442.43	12062.1	2568.17	2333.54	7176.15	4643.39	8088.66	3361.61	2673.72	3499.3	5450.52	2785.15
(M+H)+	trans-3-Coumaric acid	Unclassified	118494	67244.9	58234.2	603527	635092	453268	52853	64945.4	35508.4	931073	828648	430735	10598.8	40191.9	23899	459248	1.3682e+06	635154	20731.4	33156.4	41115.3	419773	463018	627967	25022.6	28749.8	55599.5	20788.5	22778.3	19031.9	24251.3	26951.3	37238.2	128824	117999	73422.7	35697.9	57169.5	76239.6	470894	49653.1	120590	23780.8	53907	35002.2	107182	359297
(M+NH4)+	UDP-D-Galactose	Nucleosides, nucleotides, and analogues	1966.03	1955.7	1525	4130.99	2683.13	3557.66	1844.39	2173.66	3201.28	2583.06	2113.61	2719.42	2891.85	3295.55	2589.33	3268.59	4077.96	3072.78	4703.86	4326.68	3897.58	2801.17	3094.75	2951.77	1185.39	632.509	1306.38	3279.04	2973.69	2735.75	2246.53	1674.82	1519.45	2160.54	2484.94	3045.9	2934.04	2375.55	2620.56	2475.59	1435.84	1876.88	2759.99	2872.89	2658.1	1889.01	1398.75
(M+NH4)+	Uridine 5'-diphosphate (UDP)	Nucleosides, nucleotides, and analogues	2359.79	2393.07	2279.11	3450.59	3055.82	4224.31	2318.67	2197.2	4241.24	3359.19	3162.93	2740.24	3227.03	4182.1	3156.84	3733.16	5100.2	3648.9	5690.99	4445.39	4208.74	2868.92	3691.64	3745.22	1155.1	891.798	1130.79	3420.9	3391.11	3400.51	2428.57	2022.92	1804.66	2819.11	3630.57	3051.13	3472.72	2604.97	3041.56	2668.24	1939.7	2075.78	3847.7	3517.04	3081.82	2468.06	1823.67
(M+H-H2O)+	Urocanic acid	Organoheterocyclic compounds	9668.22	744.738	7684.7	4884.52	1540.63	5599.97	1869.22	1267	2636.81	1142.15	906.232	1441.37	77726.4	6017.46	27815.2	4878.09	7374.34	2819.92	15936.7	7955.83	9387.37	6144.03	5268.18	4742.56	4811.43	4019.03	2596.24	4606.82	1490.58	1891.22	1197.87	1627.69	2291.41	1690.45	2191.17	952.551	16054.2	12517.5	37022.6	11795.8	24435.8	19724.6	17881.3	5523.89	7676.81	11826.8	12658.9
(2M+NH4)+	Xanthurenic acid	Organoheterocyclic compounds	2547.44	4088.99	1373.27	30332.4	24505.1	29494.3	1411.22	2122.02	1846.27	41782.6	41062.8	25604.4	104.418	997.193	388.981	57624.7	72853.8	47406.3	1705.77	420.781	350.143	29882.6	33297.9	49548.5	790.213	961.184	2739.23	1496.26	1701.39	2871.47	840.54	656.783	1976.52	12105	6783.82	4983	1235.72	624.866	3147.83	20612.2	5635.17	5751.43	545.559	986.706	1233.9	15784.8	18560.5
(M+NH4)+	Stachyose	Organic oxygen compounds	3935.54	4630.12	3816.26	2038.57	2566.55	2086.4	6761.36	2843.98	6281.25	3350.05	3037.17	4012.38	20971.6	16704.5	13180.2	22573.2	19114.5	14787.7	46657.4	28772	32373.8	25612.3	25100.4	23727.6	3512.52	2804.22	2428.41	2145.92	1817.54	1944.66	4704.9	5181.56	4815.08	4058.84	5814.97	5236.22	22820.5	21760.5	25424.7	16948	10901.8	19123.5	28770.9	40340.3	36202.6	26002	25928.5
(M-H)-	(+-)-Taxifolin	Unclassified	41019.4	34450.9	34828.8	186612	373940	363424	37391	55485.9	39498.9	486874	289453	350398	17657.3	5979.7	24678.7	187457	535756	404017	43413	35227.5	19021.9	181404	809715	299485	16011.4	20718.4	23650	101536	90844.5	123017	6810.35	25701.3	20027.9	308482	172822	225688	38323.1	51543.1	63865.7	607792	135091	241798	24059.9	39809.3	39026.7	187897	474376
(M+CH3COO)-	2'-Deoxy-D-ribose	Organic oxygen compounds	69809.9	92535.4	75329.2	72149.5	99187.3	73539.6	100836	164246	136400	75582.7	102096	77609.3	72635.5	122925	86959.4	132763	122879	80398.8	131305	165564	121030	44011.7	71534.3	70153.7	59820.7	53066.1	50791.2	56837.3	56386.7	53910.7	58161.5	92656.4	66050.3	87368.5	113451	113467	109698	92262	131768	160291	119682	118401	110947	136319	126428	150888	146972
(M+Na-2H)-	2-Oxoadipic acid	Organic acids and derivatives	29595.5	29669	25577.7	2568.06	4652.92	2300.43	2835.78	3249.9	2203.34	1942.52	1932.09	1634.49	2471.68	4687.62	2960.42	660.376	1529.23	1252.74	2068.54	2047.77	1822.77	1710.49	1989.66	2211.39	9908.27	8614.79	13949.8	3704.08	3402.9	3842.22	5396.69	2442.47	2496	5322.08	3262.47	2298.4	2204.83	2234.39	2373.33	2653.16	3415.88	2283.35	2178.35	2170.06	1587.05	2175.95	2997.69
(M+CH3COO)-	D-Fructose	Organooxygen compounds	122104	126217	130642	52893.1	58659.2	71803.7	115395	150131	199988	75516.3	75665.9	76002.3	90073.6	133333	133699	83408.1	88467.1	80231.2	105533	113941	120975	77756.5	90537.2	93757.3	111789	118749	109931	85079.2	89466.9	91367.9	66650.9	160968	141137	102206	117678	122636	221487	143050	134579	150873	124770	130349	141722	114199	119594	149346	141460
(M-H)-	Dehydroascorbic acid (Oxidized vitamin C)	Unclassified	1.55793e+07	1.02738e+07	1.32025e+07	5.6629e+06	7.28646e+06	9.22121e+06	1.9307e+07	2.39185e+07	3.10084e+07	3.27276e+06	2.3937e+06	2.69689e+06	1.41083e+07	2.24701e+07	1.61911e+07	3.99249e+06	2.75359e+06	1.63283e+06	1.52762e+07	1.72779e+07	1.83414e+07	2.40188e+06	2.96131e+06	3.45814e+06	2.95027e+07	1.95979e+07	2.47929e+07	1.76389e+07	1.33489e+07	1.91827e+07	2.14395e+07	1.73223e+07	2.80758e+07	7.75885e+06	6.90998e+06	9.48097e+06	3.65709e+07	2.3582e+07	2.35889e+07	7.93425e+06	1.10632e+07	1.17404e+07	2.15136e+07	1.81914e+07	1.83916e+07	1.37068e+07	1.24102e+07
(M-H)-	Dihydrouracil	Organoheterocyclic compounds	15838.5	8727.03	7477.6	3048.62	6127.89	3035.51	107746	179464	250893	470918	211764	245634	232521	415040	347297	570074	670369	623329	441664	448664	587247	347050	469738	687509	28189.3	44811.3	45311.5	14366.8	12957.8	23846.3	508539	617426	344893	849615	585062	773058	1.25939e+06	654331	711857	706677	623710	408931	629717	854013	739685	608341	567624
(M-H2O-H)-	Dihydroxyacetone	Organic oxygen compounds	246508	139434	169566	140840	89613.4	80324.4	308329	376658	391698	28245.4	18093	16412.4	198127	190253	336862	78087	32758.8	11276.3	141675	190038	272139	46485.5	58854.9	87791.6	337682	407288	379999	297265	205694	256001	279730	395346	398445	158080	84249.6	109891	399630	255135	363134	215487	175191	201183	304295	367726	203806	159716	131740
(M+CH3COO)-	Galactinol	Organic oxygen compounds	767355	986945	714576	33015.4	76529.2	35146.1	3.64833e+06	4.41036e+06	4.66578e+06	2.66173e+06	2.3684e+06	2.38378e+06	6.37849e+06	7.63552e+06	7.77241e+06	6.53342e+06	6.1065e+06	5.3826e+06	8.3354e+06	1.01315e+07	8.00614e+06	6.33964e+06	6.61481e+06	6.59005e+06	567061	548365	396937	59357.2	13220	17804.7	3.79757e+06	4.29268e+06	4.09616e+06	2.94661e+06	2.64039e+06	3.08512e+06	9.13762e+06	6.91892e+06	7.18648e+06	5.90768e+06	5.98774e+06	6.13962e+06	7.30171e+06	8.13208e+06	8.41363e+06	6.73346e+06	8.42343e+06
(M-H)-	Glyceraldehyde	Organic oxygen compounds	54548.1	49002	54194.3	42027.9	21551.9	60111.2	141411	323339	193803	11590.3	18366	17900.6	149599	153060	215185	3417.98	8414.83	10950.7	149708	205138	234201	12207.8	12110.9	12050	79970.2	77158.5	69489.8	68815.2	106037	100156	121916	250486	290947	52512.3	48360	62450.3	291380	213776	168100	20227.2	71935.9	47235.6	217016	202679	215681	49618.7	40700.4
(M-H)-	Indoleacrylic acid	Organoheterocyclic compounds	68293.9	78730.9	41116.8	204538	269849	133156	46260.5	129548	116836	306153	856889	224034	39511	90479.9	63507.5	1.26523e+06	1.70333e+06	793803	114178	175893	97747.1	718188	1.02264e+06	1.30492e+06	22825.4	26094.8	25743.3	71687.9	74738.9	91119.7	46738.8	68671.7	41814.4	192294	203123	260996	184178	69288.9	98444.8	845964	356634	609548	105156	86009.4	98718.2	699865	817635
(M-H)-	Indolelactic acid	Organoheterocyclic compounds	74582.8	89470.3	55790.8	262182	359522	160250	49689.4	145928	120646	378944	1.13258e+06	280031	40402.1	89984.6	70166.8	1.60248e+06	2.24887e+06	1.0085e+06	132840	194797	106210	918321	1.3393e+06	1.65958e+06	24548.9	29713.4	30085	84608.8	92534.1	115976	53462.4	71977.8	49035.5	233334	236480	308415	208801	74226	100958	994485	409682	749048	107177	100860	106391	814861	1.03403e+06
(M-H)-	L-Asparagine	Unclassified	8226.92	7690.81	6277.31	12796.6	12469.3	11785.1	269094	18312.1	679591	1.24143e+06	540661	638819	673439	1.19078e+06	968439	1.47034e+06	1.78293e+06	1.69662e+06	1.21132e+06	1.24454e+06	1.65036e+06	958017	1.32678e+06	1.86348e+06	16842.1	17137.1	30517.3	33062.3	29145.1	54998.8	1.43484e+06	1.76812e+06	923563	2.25343e+06	1.48548e+06	2.00664e+06	3.39086e+06	1.85042e+06	1.98691e+06	1.89554e+06	1.6451e+06	1.09015e+06	1.74706e+06	2.38312e+06	1.99324e+06	1.63918e+06	1.54976e+06
(M+CH3COO)-	L-Threonate	Organic oxygen compounds	717290	1.10214e+06	608506	591930	901729	550390	1.89911e+06	1.57278e+06	2.04643e+06	1.50858e+06	1.01746e+06	1.0224e+06	999498	1.21682e+06	1.00319e+06	977863	903546	1.03903e+06	1.09444e+06	889370	880051	1.32442e+06	1.60977e+06	888868	1.51055e+06	1.78408e+06	2.03422e+06	1.23312e+06	1.70859e+06	1.80365e+06	1.97873e+06	1.92219e+06	1.85695e+06	2.39935e+06	4.35841e+06	2.17468e+06	2.53781e+06	1.587e+06	2.05413e+06	2.26094e+06	2.3724e+06	2.20283e+06	1.7274e+06	1.40239e+06	1.34704e+06	2.96329e+06	2.92551e+06
(M-H)-	Linoleic acid	Lipids and lipid-like molecules	235465	171513	318388	285836	101693	236163	212191	288072	90271.8	5838.19	63718.8	56229.1	264228	107833	190711	24286.6	24257.2	39339.3	292669	284577	313622	63941.5	60636.8	70601.7	1.15964e+06	1.21379e+06	888548	246668	196704	192742	149302	185094	203287	73544.7	122948	68271	34028.4	232266	225862	61527.4	45551.9	91215.2	207853	206112	318273	72091.8	147730
(M+Na-2H)-	Malonic acid	Organic acids and derivatives	640186	399789	637555	405730	196266	230121	757401	704335	1.03473e+06	191568	80936.8	114566	517894	298977	803196	72758.5	140580	104619	671191	828245	513171	138862	238046	276980	906038	1.03318e+06	927009	488256	695318	645566	811032	1.07694e+06	1.04378e+06	351869	221359	275548	1.11036e+06	884074	732073	491952	394212	354954	787047	732403	515047	391223	450211
(M-H)-	N-Acetyl-L-phenylalanine	Organic acids and derivatives	4842.12	5383.9	4282.76	18999	27613.2	19229.1	2090.03	2351	2743.98	20853.3	28037.3	15911.9	1023.09	1613.58	1342.83	24516.8	30296.4	14325.6	1710.28	1796.81	1337.25	9001.5	10773.9	14257.7	96307.3	102937	80117.2	305403	304710	311374	19304.8	26698.9	23017.1	76010.2	83646.9	82220.7	23744.2	14959.5	19422.2	94888.9	59495.1	66180.5	16987.7	14180.7	16492.2	75109.1	73590.7
(M-H)-	Oleic acid	Lipids and lipid-like molecules	378593	220993	406395	213074	141836	203599	880982	1.01547e+06	676360	115539	122690	118776	1.8246e+06	630906	1.20648e+06	108554	106396	149223	1.26862e+06	1.72123e+06	1.82921e+06	124992	163815	111054	592174	621661	508332	428842	305337	313772	2.40643e+06	3.64194e+06	3.71362e+06	338658	386078	318797	621774	2.69672e+06	2.37753e+06	411910	649979	444701	2.87791e+06	2.37253e+06	3.24844e+06	1.59665e+06	1.35087e+06
(M-H)-	Quinate	Organic oxygen compounds	78652	74470.7	53702.1	326526	324055	417090	44102.6	72699.8	47196.7	42547.5	56490.8	23674	73154.1	43440.3	42834.8	46560.6	33368.7	25960.4	46038.6	53336.1	69883	56315.5	46816.8	43386	182157	215217	330964	446584	472960	611295	85509.4	70559	77560.6	33064.3	33381.9	33455.4	97029.2	67525	60551	23181.3	24717.6	41265.3	83097.2	114197	78006.5	73507.4	48298.3
(M-H)-	Raffinose	Organic oxygen compounds	86422.8	76914.8	107563	59927.2	63510.9	94550.5	19527	29599.6	86611	41090.9	58220.8	40827.1	71696.5	94607	106583	130833	148935	152216	179572	175673	193377	762145	697064	250686	53477.3	53553.8	53126.4	68318.2	53993.5	47200.7	23959.5	64651.6	26441.2	42486.5	40142.1	40369.7	129465	76297	533979	124458	100862	130128	713716	604162	590667	219479	225751
(M-H)-	Sucrose	Organic oxygen compounds	1.13223e+07	1.45713e+07	1.06572e+07	322555	1.01477e+06	373951	5.23029e+07	5.41994e+07	6.05932e+07	3.30751e+07	3.15849e+07	2.97573e+07	7.74716e+07	9.36831e+07	9.74823e+07	7.47172e+07	6.97268e+07	6.95032e+07	1.09974e+08	1.16462e+08	9.80479e+07	8.08212e+07	8.18403e+07	8.69089e+07	8.2671e+06	8.12163e+06	5.97916e+06	892413	160576	159587	5.36157e+07	5.30773e+07	5.21541e+07	4.07409e+07	3.57522e+07	4.47172e+07	1.16038e+08	8.5917e+07	1.00283e+08	7.51156e+07	7.10103e+07	7.89513e+07	9.19744e+07	1.0119e+08	1.00793e+08	8.38844e+07	9.80148e+07
(M-H)-	Traumatic Acid	Lipids and lipid-like molecules	153264	128759	172181	273002	263464	370538	17460.7	28665	31893.7	120685	126584	103670	4237.54	3228.77	8631.64	27437.9	47394.1	14058	15619.5	8091.78	9847.88	3604.65	3982.26	4373.94	27961.8	29310.2	25512.9	123146	97708.3	121682	4267.33	5698.87	2511.83	14142.9	22748.4	19494.3	6415.5	5891.53	7259.13	3759.05	1858.52	5545.67	7670.64	6853.69	5628.66	7154.04	6351.38
(M-H)-	Xanthine	Organoheterocyclic compounds	5400.81	3337.29	5295.2	4358.9	4374.57	3961.44	2842.99	3153.33	3542.28	10550	10651.1	8225.27	14565.2	4892.32	4464.73	3560.77	11900.3	2196.75	102888	61110.7	21418.2	5573.03	2663.09	2214.93	27776.2	28859.4	25067.6	21202.3	15452.2	17665.7	15750.2	17488.6	24834.8	5796.31	7361.58	6730.51	162903	187925	171323	57364	69964.8	84411.6	196058	313427	287699	79757.4	168194
(M-H)-	3-Hydorxy-3-methylglutaric acid	Lipids and lipid-like molecules	111342	133378	58803.7	71752.8	79431.1	57834.8	257703	291169	208071	299154	273262	198720	112199	138252	167340	112668	115216	100868	123980	132110	104349	116393	111317	100684	40371.3	50452.5	51391.1	45888.1	53646	61716.6	119316	96321.4	110200	258919	326016	209518	73707.8	99648.2	108218	115912	167155	121671	97735.7	112217	102743	135831	159281
(M-H)-	4-Hydroxycinnamic acid	Phenylpropanoids and polyketides	107347	81441.8	37145.9	106446	123639	129583	7972.44	9108.47	13629.8	192855	187688	146807	3016.09	6734.32	5280.37	232166	329711	208114	9040.44	7828.22	5294.32	88090.9	89890.9	120997	19996.8	19738.2	17295.2	311251	242737	274713	20482.9	17443.9	21229	607648	609635	698122	16818.7	13242.2	12825	464753	458691	562996	13536.2	12606.6	10462.5	414129	503237
(M-H)-	cis-9-Palmitoleic acid	Lipids and lipid-like molecules	31425.4	30036.2	28507.2	58103.3	62555	83111.6	949228	733589	473491	88683.8	88692.7	88523.7	7.80701e+06	4.3405e+06	7.35195e+06	74683.4	87770.7	396966	1.13246e+07	8.86902e+06	1.35813e+07	600675	473107	442328	102465	184212	64161.7	124412	108512	137425	5.67251e+06	8.35154e+06	8.02499e+06	1.1313e+06	1.10563e+06	1.32448e+06	4.54302e+06	1.78402e+07	1.75104e+07	4.10936e+06	3.95936e+06	3.1595e+06	2.14868e+07	1.9408e+07	1.84308e+07	5.88691e+06	4.64676e+06
(M+CH3COO)-	D-Mannose	Organic oxygen compounds	513487	553745	510984	850163	818135	884630	304825	556136	617067	390287	437695	317890	762409	812401	710591	1.08365e+06	797594	742849	1.27545e+06	1.39647e+06	1.1924e+06	816267	953916	1.1536e+06	507815	545537	479663	906040	896853	1.07604e+06	238363	337995	239314	447042	391075	427704	626591	390569	557451	475972	386201	458617	495683	536848	559767	777586	562580
(M+CH3COO)-	Glyoxylate	Organic acids and derivatives	38856.3	16995.1	50389.2	22594.1	30883.3	25482.2	7312.24	13250.5	7987.43	25440.8	51800.9	17172.4	2696.01	5702.47	3575.63	33294.4	31993.7	23128.9	5152.72	6615.98	4507.19	21572.5	24946.6	24146.9	48868.9	70480.8	79893.6	44606.8	62647	66704.3	5591.65	6650.02	8146.96	22849.1	22312.2	23195.2	5995.12	2812.65	3082.49	61320.4	49172	30745.1	3176.13	2973.93	2951.35	35486.6	69683.1
(M-H)-	L-Ascorbic acid	Unclassified	155903	113455	94956.3	1.00974e+06	1.14306e+06	815091	46350.2	53540.9	55305.8	158661	232420	173419	51426.7	43090.9	39889.4	110872	143547	75917.4	33962.2	48859.7	37045.9	65444.6	69548.6	78129.9	59141.5	82483.5	88744.1	569189	458312	557505	46185.1	44261.3	44284	313407	297412	392789	68611.3	47475.8	54382.8	158605	152751	226998	105374	44961.6	46101.9	144820	151035
(M+Na-2H)-	L-Gulonic gamma-lactone	Organoheterocyclic compounds	26325.3	11329.4	32187.1	9742.13	6452.86	9649.57	90671.3	140091	145817	3902.95	4333.75	5821.66	121239	129072	136302	3377.3	7695.46	6667.73	98485.3	141644	123432	3816.81	5256.09	4740.16	51308.2	75679.9	35314.7	34609.5	36396.6	42571.6	117845	158146	140457	22413	19747.2	29928.6	188543	142415	121783	7424.58	17096.8	17804.2	129830	141031	130134	20958.3	8505.88
(M-H)-	Procyanidin B2	Phenylpropanoids and polyketides	815239	1.44975e+06	534750	5.26541e+06	1.28655e+07	4.30282e+06	271182	506765	388389	3.6593e+07	3.63974e+07	2.09825e+07	97726.8	380213	152659	5.4708e+07	5.45122e+07	4.38093e+07	245799	202455	115891	3.1671e+07	3.79094e+07	4.32205e+07	101901	98208.9	520678	157106	184981	207424	159705	185697	261766	2.75376e+06	2.85262e+06	984103	353839	280255	621666	1.92404e+07	837607	4.01015e+06	136331	283424	215938	4.68751e+06	1.99058e+07
(M-H)-	Rutin	Phenylpropanoids and polyketides	118247	61647.5	162544	1.21836e+07	5.16068e+06	1.06557e+07	247509	119410	30601.9	4.30019e+06	5.08866e+06	5.81817e+06	49206.1	361247	215176	2.83499e+06	9.54723e+06	3.21424e+06	326353	91361.3	33349.3	7.06646e+06	3.37429e+06	6.94336e+06	161578	357511	313354	6.93941e+06	2.95051e+06	7.11721e+06	290363	58704.2	282568	4.0064e+06	1.64406e+06	2.21467e+06	69822.9	50376.8	299845	2.26854e+06	1.33867e+06	4.53646e+06	50719.8	136869	217269	2.23147e+06	2.47725e+06
(M-H)-	Stearic acid	Lipids and lipid-like molecules	876323	599731	357725	425690	515516	394928	1.0592e+06	517541	220894	64974	79292.4	92576.3	598705	406384	660788	14906	2209.17	12247.7	381496	444275	445364	47718.2	25598.1	19743.9	967012	1.02368e+06	926201	490897	416955	399369	832919	988945	1.29255e+06	366791	327449	187787	62693.3	411040	318970	34854	179940	95408.8	504005	428395	545343	126330	172040
(M-H)-	(+)-Abscisic acid	Lipids and lipid-like molecules	2876.56	1165.46	1967.11	2772.24	8915.71	3242.56	1928.88	2958.36	2327.19	3844.61	4662.53	2758.86	3835.63	1759.9	4019.14	6791.97	12647.7	3963.63	2668.23	2805.88	1836.06	3769.13	8344.9	4668.19	2229.89	3172.91	3055.5	2898.52	2091.74	3476.58	1589.36	2964.38	3519.6	3410	2286.75	3499.63	4882.32	1925.59	1654.8	4468.88	3945.94	4248.48	2887.57	2119.47	2812.75	4651.63	3803.53
(M+CH3COO)-	1-Deoxy-D-xylulose 5-phosphate	Organic oxygen compounds	3438.79	2276.74	2873.04	21431.4	26599.5	29272.5	4591.52	6238.17	8403.71	36829.6	23024.2	25726.8	4068.46	7263.1	8028.5	19352.9	17957.2	15507.5	10613.5	7733.54	6260.92	10959.3	10776.7	14118.3	15279.2	11787.2	14431	73909.7	59397.3	81264.9	12211.6	15679	14276.2	26159.9	31788.7	34222.1	29221	18151	22053.5	31648.8	27920.4	25542.4	22251.5	15913.1	18179.9	19569.4	26238.7
(M-H)-	1-Oleoyl-L-.alpha.-lysophosphatidic acid	Unclassified	1364.12	1279.66	660.933	15502.9	688.856	1876.5	11553.4	14308.5	5276.02	4151.42	5970.14	3265.89	5881	5252.49	10981	4700.41	4683.34	4749.25	10358.9	3977.9	4956.72	8636.87	10238.8	5256.71	1090.02	1192.67	1023.31	2304.82	4117.11	5504.88	6713.11	11352.1	11812.8	7475.48	9690.01	11620.2	4004.41	5783.89	6087.5	5700.69	9079.06	5698.97	6300.89	3398.34	3791.53	25998.7	16849
(M-H)-	1-Palmitoyl-2-hydroxy-sn-glycero-3-phosphoethanolamine	Unclassified	9909.4	7189.03	10639	46888.9	28271.6	37374.3	5068.51	4400.86	673.118	27662.3	37434.1	24431.8	9218.05	6271.63	7958.93	1123.92	6674.97	20104.1	13451.4	8183.11	8434.43	61003.6	52691.6	32850.4	7101.6	8947.38	7691	35723.1	30883.6	48425.8	3264.46	3149.03	2926.25	18908.7	22178	26766.8	1189.28	6421.57	7107.52	15255.1	14316.2	20873.4	5776.6	9004.12	8742.84	59977.1	56207.1
(M-H)-	1-Palmitoyl-2-oleoyl-phosphatidylglycerol	Unclassified	262140	263416	522161	439119	238328	387101	48254.5	142674	16052.4	127173	208273	191462	32067.4	17253.2	42010.1	3534.77	35644	57830.1	16247.4	30740.4	45603.3	72204.8	61490	44461.1	337503	180522	292102	528412	402821	377586	49975.8	34694.2	81519.3	557380	751582	333426	5371.83	39725.7	26634.3	23496.2	152998	100553	33292.7	42872.4	54040.3	82758.2	85007.1
(M-H)-	1-Palmitoyl Lysophosphatidic Acid	Unclassified	1750.72	865.456	1547.89	2710.69	1534.86	3445.31	7365.88	9630.13	3427.11	3713.98	4198.4	3069.44	5790.01	5328.08	8603.09	3841.91	6376.29	4775.06	12494	6713.67	8396.18	15497.5	18820.9	11410	4323.23	4118.14	3378.35	5409.8	4727.85	7116.85	6762.17	9921.13	7445.31	4809.07	4852.18	7732.37	6182.85	9324.99	9633.84	7192.1	7254.02	6212.94	10105.6	8732.48	8968.57	32622.6	21900.5
(M-H)-	11-Keto-.beta.-boswellic acid	Unclassified	20700.5	15573.4	13822.7	626840	532953	857052	67636.6	106283	233929	5.72988e+06	5.52973e+06	4.67654e+06	56505.4	71529.4	100245	3.77905e+06	6.75302e+06	7.79873e+06	121048	80863.9	85555.7	6.81225e+06	6.76046e+06	7.71682e+06	23012.7	31313.6	47929.7	514518	744965	935856	41409.1	78081.1	64246.8	5.42603e+06	5.93272e+06	6.57546e+06	45172.4	320713	313992	6.08365e+06	5.03769e+06	5.92391e+06	106037	223623	145757	8.32085e+06	7.01069e+06
(M+NH4-2H)-	2'-Deoxyinosine 5'-monophosphate	Nucleosides, nucleotides, and analogues	140781	370747	129048	36553.2	31555.4	41905.6	305115	292229	213805	27279.4	28872.3	23529.7	95194.4	120593	177676	24703.3	23558.1	29742.8	87772.7	104387	96895.5	48291.3	54799.7	45410.3	88968.9	163736	192442	76089	83021.9	86615	105980	142400	129614	42160.1	29749.7	35943.2	43169.1	80215.1	72726.1	18096.1	22932.6	31203.3	79342.9	104193	97600.1	57710.8	54135.3
(M+CH3COO)-	2-Dehydro-3-deoxy-D-gluconate	Unclassified	16077.7	16749.1	14434.5	25763.2	21555	23744.7	24414.8	43545.2	23939.5	15562.3	16645.2	16797.9	16800.8	29054	22455.9	22656.9	13921.3	12479.5	25281.3	28859.7	17561.6	16063.4	24929.8	24788.9	16721.7	19102.4	17736.2	18304.7	16180.1	22870.4	20627.5	20704.3	19562.3	31554.7	11563.2	22409.5	27178.8	15822.5	20724.3	21363.5	28010.5	40128.7	14508.8	15302.3	13771.8	21978.1	35907.3
(M-H)-	2-Ethyl-2-Hydroxybutyric acid	Lipids and lipid-like molecules	14817.1	12726.5	10304.9	31199.9	34873.8	25352.3	5775.46	8023.96	4667.86	12707.3	20690.6	13129.1	2453.66	5467.17	3455.98	11340.2	19476.9	8224.62	3275.36	5284.47	3488.82	8137.75	14729.6	15145.1	11939.8	15335	14647.4	28469.1	31893.5	59572.1	4636.35	6228.55	4173.01	18760.4	29129	22194.2	4820.05	4728.12	7585.25	29213.7	24729.9	33452.6	4793.53	5104.78	5996.51	19930.7	22619.1
(M-H)-	2-Isopropylmalic acid	Lipids and lipid-like molecules	4083.93	3489.67	3392.69	14786.3	17470.9	17375.4	4392.36	3471.49	2318.88	14664.2	14496.4	16627.8	2878.41	4410.07	3103.75	25781	28684.1	18925.3	6045.97	4653.72	6976.28	16394.4	21868.3	16910	2609.22	3212.88	5224.4	12338.5	11948.9	13008.8	1953.14	3285.35	2837.88	8225.96	9360.82	17743.8	4823.43	2840.11	4215.81	12727.5	11843.6	11595	2786.05	4794.91	3848.07	13034.2	12417.3
(M-H)-	2-Methylguanosine	Nucleosides, nucleotides, and analogues	1326.93	1291.69	1416.87	2603.6	2023.31	2359.5	1133.24	1272.54	2027.6	1230.29	2115.68	1840.64	1980.14	1908.1	1692.35	1742.13	1641.52	3108.98	2400.07	2974.95	2000.8	1827.07	2401.71	2227.32	2409.89	2659.72	2166.83	3738.36	2873.09	3442.34	2276.31	2774.61	2239.43	4880.15	4237.89	4721.66	4060.45	2677.6	2816.86	5320.45	5652.07	4891.61	3057.59	2768.25	2663.2	5030.41	3846.15
(M-H)-	2,3-Dihydroxy-3-methylbutyric acid	Lipids and lipid-like molecules	73826.3	69160.3	59832.8	19820.4	37850	27423.8	48794.6	97575.6	157049	64290.9	37137.6	33923.5	52737.4	76404.6	75600.4	30116.8	25953.8	15119	88343.4	92385.7	87378	21132.5	32435.6	70246.8	68157.4	90881.9	73406.7	53246	54282.7	54260.2	72932.1	65749	62194.5	96342	101095	123033	142752	61887.9	63378.9	109386	147084	113884	70455.3	68911.9	74867	117654	115231
(M-H)-	3-Dehydroshikimic acid	Unclassified	37835.3	32178.2	7236.54	11833.1	26512.6	26394.8	7312.99	9462.3	10670.7	6015.21	5042.07	10268.6	15322.6	15840.3	6259.3	8540.11	10977.6	5571.2	35370.6	33636.5	25963.1	9252.19	12024.5	5425.44	7548.57	6752.54	41662.6	11249.1	24370.2	11081.6	5792.88	6109.5	8620.25	7708.51	13899.3	16596.1	8610.23	9051.72	25082.8	7090.01	9129.43	6946.75	11170.4	29846.1	25163.8	15241.5	15059
(M-H2O-H)-	3-Hydroxyisovaleric acid	Lipids and lipid-like molecules	6102.96	7732.3	3628.98	4948.21	7566.67	3684.29	16227.6	19398.6	13753.9	20984.6	18738.2	13799.4	1802.79	3443.94	1410.59	1485.76	4129.1	3409.98	3448.49	4889.8	2873.98	1797.36	1479.83	862.811	1787.07	2003.83	2648.54	2462.64	3393.68	2917.92	4386.1	2234.38	4580.47	18138.9	13927.1	12336.7	4416.87	3857.82	3352.37	2999.39	9129.96	3822.69	2328.45	1933.5	2364.05	2758.92	911.145
(M-H2O-H)-	3-Hydroxymandelic acid	Benzenoids	13786.6	11827.5	7694.89	69086.3	63340	66659.9	2669.93	4485.2	3216.62	34309.5	37995.2	31036	1729.02	3266.31	2065.08	20821.3	30367.1	17724.8	2681.1	3340.34	3126.48	9088.62	19360.5	13161.8	9335	9991.79	8285.83	56251.5	57043.7	65920.5	2719.78	3339.95	2388.68	30324.6	30397.3	34712	3667.61	2269.14	1984.24	23074.3	19853.4	25715.3	2336.57	2845.92	3579.48	22285.3	15334
(M-H)-	3-Hydroxypropionic acid (beta-lactic acid)	Organic acids and derivatives	915000	1.643e+06	897201	478346	470522	578573	907572	1.18089e+06	1.53528e+06	590117	586263	635899	714414	1.05815e+06	1.13776e+06	636531	636682	592081	821491	908096	896674	609672	660893	709882	840674	963632	839977	625255	655968	614989	949683	1.13301e+06	1.13996e+06	788420	876741	917493	533093	1.0789e+06	943297	1.27663e+06	1.01103e+06	990054	1.02724e+06	891227	925204	1.11633e+06	1.13753e+06
M-	3-Indolepropionic acid	Unclassified	14404.1	8714.78	12004.1	50979.5	42961.7	56462.5	4839.9	8530.14	11174.3	25704.5	34829.8	26146.8	3003.76	4515.99	5984.41	20422.2	33819.9	24181.4	5022.18	5606.36	5526.39	15265.9	21084.3	29421.6	17533	16353.3	20576.8	46929.8	44567.9	53190.6	6481.82	10812.5	10696.1	21044.3	21727.8	23709.1	14625.7	9195.58	11780.2	23364.6	15155.2	21155.9	9973.2	8988.94	9404.95	20147.7	19557.8
M-	3-Phosphoserine	Organic acids and derivatives	10882.7	5754.71	10549.2	16657.3	14813.8	16049.7	6682.34	12342	15781.1	19770	21935.3	20717.1	8453.59	14186.9	14380.9	25337.1	33597.4	22752.1	16553.4	16798.6	10087.8	14773.4	24326.9	24661.7	12183.5	16149.2	20776.3	21208.4	18461	22927.4	8063.8	10985	11302.5	23982.5	22853.7	24138.5	20901.3	14302.1	13524.5	32913.8	34016.5	32060.6	14488.3	14654.3	16393.6	34662.1	39353.6
(M-H)-	4-Nitrophenol	Unclassified	25246.9	46731.1	20132	35247.4	329755	30727.4	12428.6	29503.2	23601.3	33502.9	43953.7	21757	19197.4	13386	23377	62302.2	32723.4	25160.8	21620.1	26946.6	19153	29784.1	30493.5	38427.9	21096	31626.4	19709.5	85400.3	83727.6	95048.8	43253.8	20517.6	23418.6	28331.6	17126.8	30364.8	30546.1	25801.8	23008.2	20677.7	23234.4	25859.1	25155.4	21000	18635.7	38129.7	28710.5
(M+K-2H)-	5(S)-HpETE	Unclassified	804.336	1413.63	1200.62	35564.1	54463.4	26267.6	767.109	2288.27	1703.91	27154.1	47821	14329.8	396.478	1037.94	469.813	25939.4	22925.8	13396.4	601.171	747.99	733.793	6574.25	6075.86	7446.81	1538.25	1445.96	1585.6	33650.8	38801.5	54928.2	1550.53	1749.95	1647.99	21277.3	22521.5	22943	1055.62	1224.36	1611.39	20951.2	8152.17	20470.9	1499.68	1749.93	1634.86	12859.6	23601.9
(M-H)-	5(S),14(R)-Lipoxin B4	Unclassified	3937.73	1091.86	2943.33	7047.42	5396.09	4693.92	1487.56	1970.78	3045.74	4985.93	5880.29	6649.03	2036.92	956.212	2395.18	4656.62	6898.41	5890.34	6954.14	4539.26	4730.97	2683.29	5813.56	468.352	3544.38	3901.76	2571.8	3980.55	3722.89	1542.28	2883.58	8016.18	5126.55	3509.48	2997.3	1752.34	21377.1	6670.42	8479.01	2360.16	2955.63	1801.97	7105.59	7381.29	6712.23	4187.23	4820.43
(M-H)-	Acetoacetic acid	Organic acids and derivatives	42026	32169.9	42105.4	1976.4	15084.4	10608.2	12373.1	18006.8	18221.8	9457.8	11428.1	9519.97	18120.9	10501.2	25111.5	7936.14	7046.73	3994.7	12188.2	14872.3	10267.2	6850.57	6691.79	5195.5	44240.1	50786.9	20843.1	26459	21777.5	16012.6	22309.4	19730.1	18067.8	15317.3	7671.67	17523.9	16802.4	12308	8866.45	15726.4	17483.2	9968.63	9615.82	11501.9	8704.53	16502.2	22277.1
(M-H)-	Acetyl-DL-Leucine	Organic acids and derivatives	1603.24	1432.92	1649.13	3168.66	3080.87	2411.51	1486.95	2137.99	2627.73	1916.63	2367.88	1519.5	1458.11	1814.07	1901.76	2826.74	2564.94	2089.48	2740.12	3619.2	2318.28	1820.51	2614.51	2432.96	2719.03	3732.66	3449.68	5834	7625.88	8978.99	2522.07	2348.13	2343.72	4408.21	3508.49	3943.37	6262.89	3379.01	3183.68	6417.35	5124.86	4460.18	3740.91	3974.9	3434.96	4523.43	5800.86
(M+K-2H)-	Acetylvalerenolic acid	Unclassified	2556.12	3172.25	2349.9	31818.9	36916.6	32982.8	1326.83	4676.58	3984.69	5201.26	13475.4	3767.49	5039.37	8447.38	4960.29	10555.2	18702.1	11743.2	7039.01	10520.9	11840.4	15529.1	3432.96	9025	3307.61	2627.46	2560.41	16211.3	15123.4	17801.6	5428.62	5109.78	4791.76	9597.71	9135.05	14215.1	44437.8	54458	63955.3	24817	36098.8	56115.6	101889	94445.3	75841.2	73572.7	30092.8
(M-H)-	Adenosine 3',5'-cyclic phosphate (cAMP)	Nucleosides, nucleotides, and analogues	891.607	8825.89	1844.63	4051.19	6388.47	33990.3	1517.68	850.324	1260.45	7219.18	9741.51	5127.74	84760.4	22415.9	36576.3	300821	120662	173249	444763	365848	415589	921126	885540	1.27424e+06	1641.6	1885.84	917.966	3642.28	1704.17	1389.02	12976.4	25220.3	8971.79	74857.8	70800.8	95255.1	533094	290775	352037	1.53551e+06	913994	1.12981e+06	593577	590129	655026	1.82801e+06	2.23781e+06
(M-H)-	Adenosine 5'-diphosphate (ADP)	Nucleosides, nucleotides, and analogues	1789.59	1654.41	1911.89	2308.94	1526.43	2477.73	1992.34	3814.31	3967.31	2286.68	1504.5	1634.44	9766.11	7416.27	3986.47	5653.93	4222.97	3603.59	10883.2	22455.5	7370.09	2765.3	5594.47	6711.98	529.958	822.474	1044.16	2076.42	1201.86	1184.42	1916.92	1250.42	1298.23	1198.81	2526.58	2100.21	9707.29	9422.17	13317.2	1268.69	2588.46	2034.84	12456.4	16178.5	17590.2	4282.92	2785.74
(M-H)-	Adenosine 5'-triphosphate (ATP)	Nucleosides, nucleotides, and analogues	641.335	41.6095	61.2755	737.514	771.147	2062.71	292.664	393.497	585.552	522.02	754.611	489.671	381.472	934.393	407.44	2060.42	2045.56	2431.32	953.53	1619.6	943.479	949.803	2660.1	4100.97	35.139	212.998	160.958	163.424	492.21	349.231	317.256	462.491	92.8976	543.41	627.111	860.418	311.45	879.042	1293.48	1449.22	1212.63	962.407	966.681	1285.81	965.669	885.398	1098.81
(M-H)-	Aesculin	Unclassified	38243	22208	30770.2	173188	110428	160942	20676.8	20720.9	17930.7	192217	144996	113443	14792.6	11024	11316.9	202295	99857.2	83697.6	16831.7	10105.4	6142.91	126061	92456.3	80037.9	22059	27426.7	22432.2	100315	145417	135989	18025.4	17154	17768.6	171033	184286	161671	24620.8	17240.9	22279.4	163298	124026	153811	46223.7	12506	24312	322910	172723
(M-H)-	all cis-(6,9,12)-Linolenic acid	Unclassified	13175.4	8527.97	10042	22349.5	13773.9	11394.8	1832.28	2381.49	6361.89	4471.12	13587.3	5868.63	5697.36	6220.02	1489.03	6750.3	5587.37	4762.06	6021.68	808.129	6216.81	10487.7	4893.27	7343.8	16861.6	11302	15264.6	26054.8	17803.8	13718.1	1262.15	1284.37	1394.13	5204.44	7157.2	3398.54	6802.31	5879.05	6106.74	5936.44	2220.27	3754.37	6382.94	6369.74	5954.83	1504.08	2594.68
(M-H)-	Allantoin	Organoheterocyclic compounds	3559.08	3947.77	3268.06	3620.71	2281.85	2758.98	3797.85	4196.87	5966.43	2031.57	2812.39	4416.47	3202.5	5960.13	6134.22	1747.52	3045.82	1959.37	4787.65	6326.26	4491.97	3333.16	2900.21	2212.87	3781.73	4204.79	2937.9	4622.27	2996.6	3334.6	6663.01	8713.21	5731.22	9212.95	8004.77	10323.8	16457.4	7890.79	8061.27	9823.83	10872.8	8525.31	7170.38	7268.23	6669.67	6571.12	7732.13
(M-H)-	Aloin A	Unclassified	5926.13	2924.65	4045.92	592053	474436	452216	2720.4	3160.67	3439.49	86453.2	252757	82400.7	1839.4	1989.54	2658.44	158128	68724.4	66723.5	2753.49	3428.38	2708.28	83915.1	123067	56562.6	1716.02	935.855	1755.22	65168.8	62357	53273.4	2467.33	845.523	3749.04	8599.9	15786.2	10617.2	4661.09	2983.11	1215.34	11231	14298.6	16936.6	2859.05	2159.94	1051.59	11996	13901.9
(M-H2O-H)-	alpha-D-Galactose 1-phosphate	Organic oxygen compounds	2662.36	2184.99	2264.65	6812.66	6142.29	7428.21	7252.9	12493.9	19495.8	9819.44	8507.46	8799.48	10887.1	15719.5	20001.3	9598.47	11418.6	8034.22	29929.6	16425.1	19342.6	7619.62	7359.66	8379.22	11317.6	10365.7	10668.5	12820.2	13845.1	16135	34915.2	44040.3	35513.2	14869.7	16331.4	20910.2	122009	67415.8	68985.4	25981	18658.5	18477.1	78825.9	65128.7	73729.5	28021.8	23045.3
(M-H)-	Alpha-D-Glucose	Organic oxygen compounds	5907.28	6730.79	9579.01	78209.5	70729	20333.3	4792.84	12171.1	8513.12	38546.9	46388.5	59543.6	4879	17398.8	7231.63	52782.1	58754.9	38342.6	7689.37	8929.32	7290.76	51703	41170.6	56473.1	3883.65	5833.03	4246.36	11879.7	12923	10853.2	5303.96	4913.64	1467.09	19356.7	20615.3	26310.1	7243.44	5143.28	5724	20119.5	27062.9	26206.4	5004.22	7268.52	6238.2	20942.7	18917.1
(M-H)-	Alpha-D-Glucose 1,6-bisphosphate	Organic oxygen compounds	908.219	699.624	720.232	930.271	742.341	1275.43	1291.36	2357.09	1461.04	1006.45	916.841	884.624	5300.18	3711.91	3394.8	3358.2	2628.23	2774.9	3601.14	5047.54	4632.18	957.072	3835.91	4201.81	823.287	864.092	738.79	561.005	739.817	989.282	2093.19	2290.85	1495.65	724.113	1684.57	2024.31	8197.85	5876.41	7113.34	1677.33	1440.66	1354.61	5433.88	7724.26	7471.81	1840.5	1201.62
M-	Ammelide	Unclassified	13548.2	18049.5	13441.1	28101.5	36921.9	35853.4	51647.6	51446.9	83839.2	35206.3	25164.9	27111.7	76528.3	160887	100611	85562.3	77140.7	81055.9	98681.6	112252	113612	49759.3	66021.9	86458.8	18638.3	20614.5	21987.4	88091.6	95932.7	895276	87695.7	59351.6	45382.1	59573.2	49978.3	47709	256601	160046	173889	218413	92893.5	109498	146538	150594	147390	96220.1	109110
(M-H)-	Arbutin	Organic oxygen compounds	12844.2	1541.12	10421.2	9304.06	6014.88	9903.47	1314.71	1359.17	3030.82	17460.6	20196.1	20376.1	2181.1	1455.02	1358.87	28875.3	40182.4	28880.4	1238.38	687.031	1400.46	17565.5	20625	19521.1	3119.95	3236.99	13675.8	25655.9	26075.1	22293.1	3900.37	2322.82	6027.86	20397.9	21899.7	22250.8	1431.53	1647.98	5417.16	18073.4	16292.9	23064.6	2283.41	1728.1	2047.25	14315.6	15251.9
(M-H2O-H)-	Beta-d-lactose	Unclassified	17357.2	14435.2	11905.1	52482.4	47172.2	73318.7	32590.6	35145.4	55187.6	97780.4	78638.7	101406	23671.6	36592.7	38779.1	114367	150019	149281	30186.3	37768.2	25933.6	85882.2	104536	150007	4429.41	6223.91	7436.7	21152.5	22226.1	19920.7	18683	15627.7	16247.3	75421.5	81835.3	74284.1	20801.3	21035.8	15619	58879.7	78442.7	97795.9	21683.7	17779.3	17588	100394	92252.5
(M-H)-	Boldine	Unclassified	25158	25240.1	25286.2	4060.49	3580.79	5365.18	25594	24083.8	31221	6128.36	3373.19	7894.52	32074	23924.2	35338.1	15467.1	15860.1	11540.5	30504	34257.5	27466.8	19283.1	21748	24000.7	19454.1	33586.3	22830.7	5139.98	6241.26	5694.14	17969.1	20622.6	15190.1	7338.54	5173.75	8156.12	26880.8	22522.1	20676.6	16153.7	19067.4	17586.8	26348.7	21216.7	23470.9	24641.2	20248.9
(M-H)-	Capric acid	Lipids and lipid-like molecules	93368.8	69832.9	83375.6	59260.4	44997	54460.6	120143	151834	326956	31792.3	27681.4	26858.5	459816	235024	412854	87835	41782.4	57424.5	835263	498779	1.00186e+06	79756.5	56752.6	56220.1	90526.8	100104	149749	63361.5	65353.3	62221.5	161942	278307	212950	54295.2	54551.1	73261.6	1.80311e+06	894793	891594	499865	188758	279717	1.15206e+06	1.27409e+06	1.17616e+06	357242	330563
(M-H)-	Cholesteryl sulfate	Unclassified	14131.9	4898.75	13084.9	93044.9	45685.5	92399.7	5566	9830.61	1965.97	57037.7	57048.1	71504.8	23273.2	4544.19	20927.2	19330.5	58267.4	49335.1	13729.6	10654.9	14080.9	51728.1	59833.2	59577.4	13598	18211.7	21997.1	84966.6	68700.6	78663.2	3086.07	7135.25	5062.93	42184.7	52173.8	82340	1620.2	8511.53	12101.3	14502.8	54262.6	64590.5	10287.1	7931.78	11431.7	47959.6	65183.2
(M-H)-	cis-Aconitate	Organic acids and derivatives	303772	339891	276065	693726	909382	529165	233279	323658	244915	650232	643919	265112	75192.5	119437	245113	239366	103792	42856.7	90474.1	65934.7	47398.6	66297.8	39228.2	67557.9	288319	424749	411479	629219	673759	810028	90269.8	118977	76696.1	125047	96024.4	82436.7	81771.3	70440.1	157696	69553.9	174503	51917.7	65516	78109.1	135966	107414	200526
(M-H)-	Citraconic acid	Lipids and lipid-like molecules	355197	240307	274428	149888	75866.6	78216.4	72932.2	154679	71377.1	111424	109468	57530.1	86288.3	77067.9	70522.5	123928	123409	62276.8	81948.2	102622	74425.3	70233	90669.9	80089.6	239595	381747	254682	122029	162454	140993	58088.1	69459.1	56218.2	144217	119720	226616	76489.3	86624.3	58720.9	115937	140374	116135	52554.4	81382.5	58726.3	123750	172671
(M-H)-	Citramalic acid	Lipids and lipid-like molecules	462247	178043	220460	53560	60268.2	64398.5	96414.6	169650	121851	55941.4	83694.2	69490.5	157272	186152	168684	301461	132192	92854.7	377336	430055	267903	215663	247110	148546	224467	252423	186822	83476.9	101767	92608.5	47731.8	49637.1	43203.4	231752	194558	131416	117085	68238.7	85719	264566	252769	200959	96587	171296	141209	233237	405925
(M-H)-	Citrate	Organic acids and derivatives	160305	162917	143558	219483	149875	240064	6.0769e+06	7.13266e+06	8.13775e+06	1.98458e+06	1.44313e+06	671492	7.08656e+06	9.20972e+06	7.62999e+06	6.0684e+06	4.23946e+06	2.88967e+06	8.94886e+06	1.03959e+07	7.18543e+06	1.30905e+06	1.93396e+06	2.17322e+06	179472	218788	143326	153982	69981.7	117307	7.11189e+06	6.60895e+06	5.78316e+06	3.13177e+06	2.88384e+06	3.38209e+06	1.24962e+07	7.47453e+06	1.05333e+07	7.74135e+06	8.45873e+06	5.76887e+06	6.81237e+06	8.32816e+06	6.49999e+06	6.13114e+06	7.53301e+06
(M-H)-	Citric acid	Organic acids and derivatives	591982	412508	865064	252150	325105	317320	78130	72824.7	118076	212028	119757	200691	113066	88496.1	71362.3	96872.9	101520	38310.4	58045.5	72179.3	83202.8	38493.5	53859.3	43405.8	799121	614748	784192	386402	374294	526127	66587.5	169469	71314.9	537414	388840	463686	90452.3	78043.1	73823	316113	199476	166784	72664.1	57012.3	72509.4	183089	179243
(M-H)-	Cytidine 2',3'-cyclic phosphate	Nucleosides, nucleotides, and analogues	17018.4	5114.83	16380.8	6138.56	4602.08	6152.85	30773	39535.8	43227.6	2674.44	2234.51	3846.1	27450.6	110111	45753.9	1655.18	2805.12	4030.21	18866.4	32196.8	46416.2	3760.51	4860.97	3854.25	20136.7	51178.9	16089.6	10177.9	10012.9	9259.99	86875.3	38227.6	83965	6479.17	6500.13	7799.99	60325.3	55711.1	21728.8	5455.05	5859.44	2779.1	78891.1	39658.5	38365.2	7871.12	9048.71
(M-H)-	D-Arabinono-1,4-lactone	Unclassified	456119	343203	464515	65111.8	147976	128498	45860.7	55315.2	69763.7	109556	93487.1	101673	54648.8	50578.3	45016.6	62862.6	71248.1	50798.4	42498.1	56109.5	45153.6	41824.1	57740.6	25884.9	377721	505060	457596	177882	231800	205152	42996.1	60794.2	46800.6	237439	241715	210452	65444.8	52523.9	47447.1	210518	189212	108442	49991.9	45132	54778.5	130131	176668
(M-H)-	D-Aspartic acid	Organic acids and derivatives	29794.5	45716.6	25136.2	14240	26244.8	19635.7	68414.6	96291.1	147559	99137.7	67590.2	74631.3	84581.1	151335	156769	113760	164437	180653	90900.1	87247.9	96313	78270.8	88568.6	174553	18597.9	22964.5	21256.2	23111.6	21494.2	21735.4	70677.7	98486.7	89657.4	95048.7	57787.8	81498.2	212021	108819	116843	96250.8	110239	91707.5	92301.7	94104.8	70203.2	117353	123762
(M-H2O-H)-	D-Biotin	Unclassified	17085.5	15415	19742.6	4954.06	4029.62	7158.12	13375.2	16405.9	24160	8053.8	6767.47	7714.96	7485.82	13471.1	11031.8	7989.24	6135.82	9059.15	11828.5	13029.7	13209.1	9766.73	10588.2	11681.2	18006.5	21047.1	15977.9	13869.6	13852.5	11646.5	14018.3	17103.9	12845.4	12202.2	13449.9	16505	19977.5	12226.7	17151.3	15056.8	16918.4	15105.9	12991.1	11833.5	12293.2	22856.5	16857
(M-H2O-H)-	D-Galactarate	Organic oxygen compounds	175944	241013	214534	64391.3	171214	69278.2	87600.1	103668	192299	35539.3	35340.8	31679.6	26069.4	38737.6	44380.7	19239.1	26464.5	21793.1	49123	30075.7	55292.2	132280	23257.5	33911.7	326960	242301	234873	100904	117741	114384	126686	36080.2	77737.2	79397.7	128693	62463.3	26254.1	23957.2	21069	75604.4	78060.3	56120	22530.5	75656.2	27965.5	51569.4	109406
(M-H)-	D-galacturonic acid	Unclassified	23027.1	19860.1	11414.9	15505.6	12791.1	18781.7	41860	52669.3	56928.2	21252.5	11576.4	10980.3	9297.87	39537.1	47680.5	33428.3	15587.2	17325.2	37549.2	39617	35042.1	26771.5	27223.3	43085.7	40601.6	25980.7	49474.1	44375.6	17999.3	57119.8	16420.1	16535.3	18228.3	32099.8	26802.2	42334.3	32096.4	28478.5	22986.8	14796.8	25455.2	47274.8	22004.4	20233.7	20041.9	67632.4	64704.5
(M+CH3COO)-	D-gluconate	Organic oxygen compounds	44645	28560.8	27482.2	14994.6	7101.64	14543.2	29688.2	24452.7	39498.9	21305.2	7490.05	12650.8	24026.8	60382.1	27873.6	17188	7089.5	11810.5	24268.3	42278.6	27921.1	8072.27	9727.56	14080.7	28108.4	28573.7	40446	15236.5	16202.8	14672	24503.4	38927.9	27094.4	18584.6	37168.1	40176.7	85153.3	42210.7	29663.3	23588.2	47752.5	35613.7	29756.4	51988.4	52214.3	19256.1	36654.4
(M-H)-	D-Glucosamine 1-phosphate (Glucosamine-1P)	Unclassified	1232.81	1347.06	1153.55	2753.49	2390.12	2405.08	1765.35	1695.05	2338.94	3013.95	2863.41	1789.69	4979.09	3821.58	4260.16	8747.16	6228.25	5185.88	11989.4	12716.1	9430.42	7740.96	9552.67	7017.41	1640.94	1719.22	1469.09	2506.26	1950.26	3264.44	3559.01	6165.34	2647.74	5964.11	4078.46	7832.85	11229.9	6350.14	10236.8	9017.76	4959.4	5916.6	10009.9	14256.7	14126	9306.97	8182.38
(M-H)-	D-Lyxose	Unclassified	169498	147534	139424	74619.8	81333.6	86744.3	150244	185608	230558	102932	96856.1	103435	139169	187653	175788	85002.2	86942.2	104004	140189	157055	160056	91596.8	127877	127877	111653	146531	150173	114965	122020	113699	161466	197379	184925	156280	166124	157296	353339	209444	169517	128591	181569	253088	187797	189094	153946	197551	192638
(M-H)-	D-Mannose 1-phosphate	Organic oxygen compounds	8364.93	3179.55	8114.86	9895.61	21535.5	35079.5	19840.4	53458.5	35006.4	44830.9	35608.8	35966.8	43960.8	54123.4	42355.9	371451	307609	172939	44621.7	44778.8	39577.7	75788.4	123161	160633	5005.41	18440.4	5093.54	42681.4	11700.2	12522	18566.7	32137.6	49267.3	35103.2	31794.6	62609.9	36125.2	39786.8	47610.3	70477.7	45965.1	72087.7	36406.6	40459.1	40813.5	55836.7	46971.6
(M+Na-2H)-	D-Quinovose	Unclassified	9186.85	2935.86	3378.87	3138.45	5018.46	2272.03	14092.8	7829.46	9758.56	1596.37	698.833	381.94	10436.6	9191.5	11969.5	700.554	3925.31	2699.21	12844.2	8354.23	12082.6	1459.09	2224.81	1481.73	9393.26	12954	7794.61	12518.3	14434.8	13424.3	4989.31	8167.71	8103.78	5391.86	13093.6	20674	14869	7165.86	7244.49	11245	27799.7	18103.6	8063.91	10965.9	7692.73	26574.9	15664.5
(2M-H)-	D-Ribose	Organic oxygen compounds	686.239	4373.91	1361.65	736.673	9069.92	64068.3	3153.84	1441.41	1352.01	1761.56	1436.62	27123.7	2664.96	3913.83	5276.08	6627.69	9451.02	7583.55	4614.2	5716.73	8731.09	8590.21	1943.15	21778.5	3910.18	531.058	1671.14	5194.68	4528.38	3011.85	3658.62	725.299	3796.31	10768.6	11763.9	19926	5802.85	912.034	1064.82	1762.67	12901.6	13006.5	821.123	1820.17	1843.3	1487.72	1065.18
(M-H2O-H)-	D-Tagatose	Organic oxygen compounds	502894	500798	489055	245854	239021	284631	514840	669492	942444	346400	312363	339527	397330	616380	612577	366607	364058	322491	463445	518616	537433	316739	376130	425115	503067	520398	449990	403754	382502	353457	557688	669630	655386	504688	454470	508801	999479	615065	561026	615109	578942	545371	640272	528801	557100	635418	622699
(M+K-2H)-	D-Threitol	Organic oxygen compounds	5685.93	6720.4	5445.83	8863.7	5985.15	7131.8	9522.29	10669.1	16284.3	9203.86	11784.6	6711.4	20287.9	24004.2	18089.7	21332.6	15699.1	9854.23	27020.8	35037.4	24097.7	11087.3	14101.5	11775.3	5879.26	6533.08	6915.49	6606.62	2443.17	3040.42	8522.48	7690.54	5837.68	11875.4	8668.33	10241.7	23087.4	15789.4	17539.9	17123	18412	12803.1	17165.5	22059.1	18812.2	14194.9	19109.6
(M+Na-2H)-	D(-)-beta-hydroxy butyric acid	Unclassified	8310.03	9433.88	15507	13532.9	11356.4	13684.8	11255.1	8673.65	7214.95	6177.04	7815.96	7002.17	9516.79	15606.7	10626	13243.8	10396.3	11370.8	17427.2	15077.6	16564.2	11846.3	16877.2	15252.1	7343.84	7943.74	9032.05	11662.9	11156	18288.2	5261.23	6291.74	7523.16	7595.91	7437.46	7006.56	9057.02	8707.73	10218.5	8965.84	7313.84	7290.75	6845.53	9217.83	7621.39	11573.5	9991.68
(M-H)-	DL-2-Aminoadipic acid	Unclassified	1788.68	1765.24	2039.02	2145.77	1774.03	2170.91	1691.91	1882.54	2362.59	1770.36	1617.65	1272.48	1473.15	1081.68	2137.17	3818.62	4943.64	3662.5	3189.39	3605.16	3896.76	4601.78	6078.48	8424.49	1818.28	1817.47	1793.82	1708.29	1536.55	1759.08	3045.53	2597.88	2458.57	3640.57	3164.85	2712.78	3901.57	2877.58	2784.36	5133.94	3945.79	4554.66	2794.57	2405.97	2356.56	4387.82	3540.68
(M-H)-	DL-3-Phenyllactic acid	Phenylpropanoids and polyketides/alkaloids and derivatives	8433.58	6398.64	6125.31	13818.4	8282.66	10322.5	1901.1	2788.76	2416.69	3461.59	4221.24	2888.09	2135.97	2795.87	2220.03	3339.51	8577.86	6359.08	11840.3	16517.3	10390.1	26242.3	31475.3	40096.5	5451.15	4466.57	3686.4	10018.8	9287.59	11266.8	1813.42	3883.55	2353.58	12642.1	4753.22	13980.5	16976.8	10816.5	12894.5	24078.5	16462.8	29225.7	21373.6	14756	16646.8	45347.1	26668.6
(M-H2O-H)-	DL-3,4-Dihydroxyphenyl glycol	Unclassified	101278	22520.1	28906.2	240170	256005	252471	23927	28211.8	42106.4	65309.2	76434.6	50923.3	13770.3	89446.7	20514.8	110290	100728	33576.6	38180.4	21247	21288.2	28739.8	35285	37522.3	70033.5	93784.4	45948.1	106481	132476	104972	42750.1	21978.8	17555.2	61765.7	49828.9	57782.3	20500.5	21283.4	17534	120098	62708.4	62262.6	14653.3	17086	10994.7	52346.9	129056
(M-H)-	DL-lactate	Organic acids and derivatives	13356.8	16126.9	20024	3870.87	6709.41	4869.73	24439.3	38284.1	39543.9	24326.8	25469.3	17502.9	47315.6	61820.5	49181.5	45980.8	37540.7	25540.6	75333.6	90916.8	60233.3	31369.1	37099.9	27229.7	8520.89	11580.7	9509.07	9629.06	6910.31	7352.12	24851.6	24669.4	24598	37528.3	26148.8	34401.4	58043.9	40727.4	44246.5	42795.2	48613.6	41510.5	44000.5	64372.1	50056.4	42581.2	55911.6
(M-H)-	DL-Serine	Organic acids and derivatives	10937.5	5225.43	8688.45	10051	6959.53	10879.6	10784.6	23726.3	22200.1	23688.3	21317.3	19593	19292.7	29821.9	24430	20720.7	19609.2	19868.9	22511.1	26689.9	30916.8	15839.5	18832.4	24643.3	6026.56	14052.4	5466.66	9880.88	10837.9	10165.3	11756.9	12429.6	9454.57	17304.8	11853.4	13790.1	40736.9	25265.2	27118.6	19622.7	17100.4	17930.9	20792.1	33324	27216.9	17128.1	22284.7
(M-H)-	Dodecanoic acid	Lipids and lipid-like molecules	32212.5	30095.4	25253.9	15105.4	26915.1	17935	42501.5	69609.1	53438.4	10036.3	13211	1949.39	956656	468749	865075	35248.5	30043.3	44793.1	2.33403e+06	1.55912e+06	2.23824e+06	214198	170125	115508	32861.7	49256.9	34669.9	42060.9	23614.5	42473	225331	441240	328516	58223.4	65582	101430	1.56501e+06	1.78389e+06	1.75994e+06	1.07782e+06	573248	913703	2.77616e+06	2.26906e+06	2.78281e+06	913546	1.09625e+06
(M-H)-	Embelin	Unclassified	287525	233443	140669	728331	1.03777e+06	619258	184279	157376	268922	503097	616881	699692	162992	143464	370581	218310	457033	304075	429054	211410	285600	766687	693297	666753	171882	235982	436487	1.06648e+06	389702	1.11772e+06	77378.8	595833	126696	339897	315559	447688	345176	236582	134864	923637	1.27802e+06	896222	222522	553411	205065	934512	782302
(M+Na-2H)-	Erythritol	Organic oxygen compounds	155587	185905	108900	79648.2	86362	59633.1	100905	133212	148090	91818.5	49067	95047.1	64485.1	95526.7	108224	49545.8	57203.5	85815.1	147902	174797	89847.9	53470.4	64421.7	67553.5	142418	167521	97598.4	61250	74383.1	79732.9	114469	115054	105798	140394	135790	148442	161903	192036	173842	80291.7	166238	165158	184097	161004	153699	77774	96522.1
(M-H2O-H)-	Fludrocortisone acetate	Unclassified	2535.67	2404.24	2876.6	5644.18	5730.36	4042.62	1270.65	1776.31	1393.38	3561.97	3935.46	2612.87	1151.45	1582.76	2056.04	5965.77	4836.37	2277.56	1434.07	2038.12	1744.55	3329.78	3104.55	4192.77	2647.61	2783.8	2934.36	7520.55	6301.13	9278.8	1786.19	2072.55	1958.51	5690.05	6159.79	8019.1	4158.11	1777.12	2105.94	5016.5	5170.08	6161.9	2130.06	2178.35	2124.93	4377.33	5403.6
(M+CH3COO)-	Fosfomycin	Unclassified	1623.82	1365.63	1599.88	2176.33	2195.54	1867.53	1190.01	3105.22	1340.53	1203.75	2099.07	1458.88	2339.78	2393.95	2644.55	2805.88	1753.02	2796.87	5389.47	5167.44	4463.97	3680.07	3165.22	3523.01	1570.28	1651.31	1534.91	1601.83	1746.27	2241.03	1540.45	1642.68	1579.69	2257.96	1277.03	2227.37	3663.25	2450.56	3575.73	2691.63	1734.08	2142.47	2575.22	4384.51	4468.25	3203.46	3410.93
(M-H)-	Galactonic acid	Organic acids and derivatives	5170.15	5725.37	7493.77	4604.59	4467.69	5894.51	5634.33	2321.96	5313.22	2880.55	1135.42	5030.08	3466.99	5871.05	7386.88	5019.18	1218.29	629.354	4542.74	3555.41	4334.54	4678.57	5824.09	6312.85	4345.75	12439.5	6754.27	3520.71	5313.39	3684.07	3338.51	5153.07	4423.05	7290.66	3777.73	4916.72	2760.08	3385.49	1970.06	3504.31	9296.18	6854.54	2504.1	5752.03	2460.14	1626.65	3081.89
(M-H)-	gamma-L-Glutamyl-L-glutamic acid	Organic acids and derivatives	1008.29	1392.85	1384.86	1544.99	3314.8	2517.09	435.213	516.457	1160.04	964.124	1170.46	981.282	701.203	1296.02	1007.95	910.31	1875.67	1009.02	1153.42	886.033	687.57	634.323	3838.87	959.054	1774	1967.03	2357.29	6791.5	7221.74	8640.78	1055.15	1296.84	887.962	1137.36	913.073	1115.71	2945.5	2168.43	1909.86	3624.78	3285.69	3105.14	1625.07	1924.44	1853.92	2336.87	3943.36
(M+CH3COO)-	Glucosamine	Organic oxygen compounds	11217.5	8179.42	10163.8	6841.55	4384.77	5719.53	10530.4	13037.8	11734.4	7387.8	5783.87	7374.03	8140.4	12039.8	13315.7	6425.88	8477.08	8906.1	7644.73	8540.05	9093.33	7260.78	3879.29	5269.82	8877.75	11330.1	8174.83	8996.67	7510.41	8205.29	10174.7	11087.2	9915.77	11840.4	9092.14	13350.2	16381.4	12830.7	13964.3	12114.8	12937.4	12115.5	9008.37	10484	9609.75	13193.6	11962.2
(M-H)-	Glutaconic acid	Organic acids and derivatives	91180.5	110547	74798.7	27733.3	33240.8	28819.2	83483.9	71826.8	67083	36423.8	33441.1	23799.4	65114.4	86527.9	74034.7	104349	58905.1	37070.8	79728.6	101194	72148.1	26824.1	43369.6	49852.9	73323.8	97207.5	76727	43272	43899.3	47331.8	76906	60408	62075	50982.4	71592.8	50094.3	120800	76964.1	110863	80526.9	77131.6	91523.1	71683.1	112690	75610.7	69606.4	82194.2
(M-H)-	Glyceric acid	Organic oxygen compounds	94570.1	100571	80853.1	23609.9	36809.7	21531.6	111339	90858.7	116198	68887.7	62093.9	48597.7	730740	571060	340370	128725	84479.2	90927.4	1.78062e+06	1.59777e+06	1.48325e+06	155460	157953	121588	72749.8	78159	122389	64740.6	83395.4	59216.6	67903.3	104103	52902.1	198545	154382	133812	1.23442e+06	905716	902984	734998	740529	450300	1.13822e+06	1.51596e+06	1.40337e+06	454332	785770
(M-H)-	Glycerol 3-phosphate	Lipids and lipid-like molecules	1924.58	1386.87	1785.22	2633.41	2415.58	4830.89	2605.49	2063.41	3945.84	10158.4	7844.08	8116.33	4499.42	4516.9	4735.76	23884.9	19463.7	16023.1	10550.3	10930.6	9519.18	18403.1	21212.2	20839.4	1395.62	1239.98	1413.14	854.164	1334.46	1551.05	2421.45	3727.43	2066.81	8650.74	8943.72	11413.7	7425.13	4316.59	5544.34	14258.1	11199	10280.1	5463.12	6441.85	6650.41	12336.3	15011.8
(M+CH3COO)-	Glycine	Organic acids and derivatives	25810.5	13325.6	20847.7	1651.66	4171.87	3228.24	1851.86	3034.3	3119.84	875.263	1047.89	2559.61	1797.74	2876.1	2717.89	342.718	782.554	884.453	2098.92	1848.52	2754.08	1041.38	2103.98	2130.94	20233.5	26391.9	21038.1	7334.75	8124.9	7343.73	3304.98	2288.66	4415.16	6370.86	7562.13	6584.58	3183.99	4731.46	3441.52	3835.7	3005.01	2557.83	5872.29	2821.66	2477.99	4169.67	5380.19
(M-H)-	Guanosine	Nucleosides, nucleotides, and analogues	29401	29646.6	33958.3	7427.19	7996.1	11419.4	19553.6	24223.7	41569.4	9118.27	9456.86	7214.87	23959.8	40021.1	28971.7	12317.7	15538.8	9797.13	43687	42975.9	46624	11744	13559.6	15174.4	35863.4	37404.7	33799.5	19272.8	18571.3	19741.8	23918	26239.7	19920.5	13266.2	16187.3	15633.9	51120.6	35582.2	41977.2	17825.9	20986.7	16870.3	38040.1	26366.9	33541.1	23906.3	22557.2
(M-H)-	Guanosine diphosphate mannose	Nucleosides, nucleotides, and analogues	653.998	826.647	649.893	1204.06	960.258	847.655	653.025	1073.44	1141.83	1635.67	1883.37	624.711	1262.67	1693.87	975.969	1254.85	1385.3	823.816	1727.67	2287.22	1608.19	999.504	1320.47	1380.07	606.944	599.942	643.926	2214.74	2405.93	2024.44	530.094	557.604	352.04	1349.93	1335.46	343.252	1401.66	866.57	933.841	1358.27	1547.84	393.106	841.25	1133.64	920.766	687.805	721.799
(M-H2O-H)-	Hesperetin	Unclassified	10236.9	16764	6442.53	9242.17	11174.1	11423	4213.46	2732.05	7509.33	11800	10881.4	10528	3581.11	6897.12	4350.54	9747.12	11719.2	11165.1	1798.45	3088.3	13133.2	10154.4	10573.7	12441.4	5426.29	14231	10718.3	6120.34	11414.9	7438.85	1986.35	5031.27	3749.16	7639.64	13318.8	10078.1	2423.88	6876.3	2594	11444	13789.8	9712.61	2925.35	3423.25	2327.36	6352.01	18539.3
(M-H)-	Homocitrate	Organic acids and derivatives	3882.21	4746.8	4088.87	3858.31	426.194	3805.39	2211.29	3227.21	2107.26	2379.78	2640.03	2796.4	4457.72	5540.28	4486.93	2576.25	1516.11	452.175	3559.63	6661.52	9509.05	1802.57	1889.68	1200.74	4021.62	4049.13	4258.07	3754.6	3929.66	3542.64	5374.79	3613.35	4568.58	1845	1409.94	2022.32	43423.8	16462.1	15650.3	3987.75	2741.63	2745.06	12296.4	18918.6	11815.1	2324.06	2726.8
(M-H)-	Kynurenic acid	Organoheterocyclic compounds	1506.31	2570.08	2365.06	6876.89	7728.32	7692.02	2598.42	1977.98	4374.64	8229.45	7738.91	6048.28	975.298	2233.18	1495.44	8885.76	10237.9	4236.26	1886.16	1326.07	1065.5	3195.96	2950.2	2595.8	1649.94	3373.05	1610.95	3567.67	6519.04	1892.67	2944.18	3124.86	3506.45	4640.87	5756.79	5301.62	3646.34	2280	2247.06	5633.51	4658.62	4047.3	1827.15	3011.21	3485.27	3915.78	4888.79
(M-H)-	L-Alanine	Organic acids and derivatives	5912.61	4924.35	4726.68	4024.88	8869.74	5903.01	11231.8	10644.5	15863.4	11124	10332.7	10043.9	14872.2	26555.8	29446.7	21340.8	16431.6	15083.5	12420.3	13010.3	20423.3	6337.74	6291.17	14733.2	3405.62	4869.55	4159.83	6731.44	7635.98	8051.84	8695.24	9088.09	8496.02	12651	10790.7	15235.3	55688.3	34180.4	44236.3	19788.3	17876	14848.8	29595.8	29516.5	23877.7	16474.4	16406.7
(M+CH3COO)-	L-Fucose	Organic oxygen compounds	3191.23	2520.33	2460.02	1584.82	2120.64	968.477	2334.68	2460.67	3758.34	2419.21	2576.18	2863.38	2025.73	2373.6	2064.49	5559.94	6905.49	1217.14	6370.13	2885.02	1479.46	3352.72	4760.42	1966.76	3183.24	3474.09	3487.61	3013.51	3583.84	3281.62	2358.07	2907.03	2136.37	5563.97	3158.02	3391.92	6415.91	2588.62	2719.23	4192.96	3737.94	3095.36	2556.93	3006.99	2449.11	7163.17	4595.63
(M+CH3COO)-	L-Galactono-1,4-lactone	Unclassified	992.523	679.764	823.3	1073.13	366.358	975.552	1314.23	1580.25	518.499	1495.11	1447.36	1155.08	1517.68	1959.94	1824.17	2282.19	2359.64	1853.47	2168.44	2587.47	2317.76	1829.39	2026.18	2394.37	1860.82	1924.9	2001.54	1671.01	1764.06	1956.71	690.209	484.162	607.754	687.628	392.65	803.944	1120.24	575.342	710.172	831.211	1706.78	805.251	694.799	651.644	722.342	864.969	735.111
(M-H)-	L-Glutamate	Organic acids and derivatives	52086	72635.2	50871.1	84994.9	126312	128280	253940	250704	415288	131740	82531.3	98895.9	366828	801983	522166	357539	330126	361026	493629	581974	576996	220806	289924	376629	61459.9	67017.6	78789.8	362100	353872	399549	256422	291403	221138	234665	176264	171354	1.3306e+06	802022	891406	567023	423354	489988	757182	762356	760416	438595	531547
(M+Na-2H)-	L-Iditol	Organic oxygen compounds	3097.37	3006.98	2665.19	3396.03	2695.82	2936.84	2226.02	4227.14	5055.33	3302.5	4365.31	3235.2	3552.92	4504.59	4177.28	5124.84	6247.04	5177.78	5177.88	6576.82	4595.65	3843.88	4935.6	4749.34	2683.68	2332.96	2477.01	3867.3	2901.91	3785.52	2484.79	3550.39	2036.38	5370.46	9267.77	7041.62	7094.27	3277.87	5006.3	7969.17	5357.94	7111.97	4323.5	3619.08	4114.74	5910.12	7248.06
(M-H)-	L-Malic acid	Organic acids and derivatives	27582.7	30972.5	23304.6	17347.1	15521.9	22625.8	66888.4	93529.8	65857	47545.9	55181.9	39411.6	70437.4	119882	103415	66871.7	60138.4	42439	133814	195677	88722.5	49822.6	65850.1	42749.5	20764.6	22279	23231	18184.8	17238	16321.7	53201.2	41786.5	48720.6	62036.4	53894.7	67421.5	139316	80670.6	71201.1	56386.1	80698.5	54477.3	38570.9	131855	104598	91093.8	107716
(M-H)-	L-Phenylalanine	Organic acids and derivatives	2686.89	1315.92	1524.68	3568.61	5462.54	4058.89	887.559	1388.85	690.772	5569.19	6204.06	3114.04	639.925	810.841	729.03	5084.99	6827.4	3241.67	597.427	776.264	522.601	1791.75	2371.71	3335.91	16974	17553.4	13663.8	45503.4	44828.7	50287.7	3864.29	4903.48	4080.23	13029.9	13762.2	13034.3	4731.46	3172.84	4106.21	14785.4	10121.9	14427.3	3551.11	2918.09	3336.92	11425.8	12165.9
(M-H)-	L-Ribulose	Unclassified	9394.95	8298.48	10084.6	9379.68	9858.34	10331	15233	22208.3	35817.9	5118.51	13288.2	9921.18	9753.45	12500.4	15156.6	8416.93	12942.3	8312.9	15525.3	13806.9	38134.3	3424.52	7794.91	4967.16	10447.8	14090.4	10110.8	10809.2	12609.8	14342.6	8572.26	15607.4	15645.1	9968.35	16370.8	10699.7	18624.4	18400	14913	9113.06	18006.5	24834.8	10652.9	9464.32	10469.1	14151.8	27431.3
(M-H)-	L-Threonine	Unclassified	1991.57	3981.2	1142.96	701.532	1578.04	3714.79	2827.52	1637.67	12539.9	5618.73	4477.18	4340.37	14483.7	16429.6	7850.74	11858.1	9056.57	8095.13	20525.8	17601.3	28073.2	6541.87	8659.32	11199.6	3416.98	1048.09	3242.69	5352.25	4906.06	6028.38	4828.93	6895.43	4018.08	6283.16	8453.85	9448.47	28423.3	21776.2	22464.9	19091.6	9714.06	10280	22606.5	27755	26768.7	11595.5	11344.9
(M-H)-	L-Tryptophan	Organoheterocyclic compounds	1525.08	1586.78	3241.43	5350.21	2709.14	6014.57	3393.03	1689.34	3263.17	3555.42	3342.94	3322.38	3929.51	3059.33	2472.6	1923.19	3381.92	2974.5	10804.8	9100.92	11585.2	4084.67	3190.59	7369.25	6470.95	7908.54	10588.1	14012.3	15820.5	14728	10708.5	6442.03	2255.37	2691	4856.35	3548.65	15527.8	6724.3	8203.47	10675.6	6937.06	10490	8965.41	9332.75	11294.4	8717.64	6653.16
M-	m-Chlorohippuric acid	Unclassified	44874.5	35674.8	46114.8	58507	65620.7	66373.5	21093.7	15268.9	20014.8	28734.5	27356.2	32426.1	12654.3	12720.7	16765.6	17991.8	20696.5	17659.8	15762.8	16253.4	17673	18868	17666.5	16061.3	46307.9	57298.8	51478.9	80641.7	82716.9	79792.8	19979.1	19144.1	20143.9	72690.5	78495.4	67096.3	29065.8	16213.5	18662.8	37263.4	40207.5	43891.8	22466.5	19088.4	17259.5	34379.7	35857.7
(M-H)-	Maleamic acid	Unclassified	8739.97	9193.09	9109.44	3955.33	6930.04	1774.65	48782.1	56252.6	121170	216078	102957	120230	117278	201598	166821	265469	300769	292208	212465	215291	273468	165333	220138	315013	13361.4	27349.3	25963.3	9109.81	15360.3	14101.3	241575	281630	161402	382335	262873	359342	564457	310033	326763	325159	284622	191746	296204	393850	328357	284457	265221
(M+CH3COO)-	Manumycin A	Unclassified	3382.07	3574.41	2782.77	1470.5	2560.94	2295.34	1603.79	1395.82	4220.27	3422.45	2493.07	2536.15	862.944	870.321	1045.21	7183.2	7375.79	6826.69	1965.28	1733.93	1345.46	6171.26	6252.66	5403.85	2470.2	3637.7	3103.62	4161.41	3427.85	3194.8	1596.09	1691.21	1250.52	4950.44	6221.27	5542.68	2037.79	1428.61	979.613	6642.86	7117.94	5939.3	1263.89	1029.21	1085.31	8611.15	10428.7
(M-H)-	Mesaconic acid	Lipids and lipid-like molecules	1.59289e+06	1.54839e+06	1.43109e+06	2.86237e+06	3.86879e+06	2.35124e+06	1.23914e+06	1.54168e+06	1.26346e+06	2.54788e+06	2.61486e+06	1.31301e+06	307537	576944	360434	677652	623874	236066	256916	297125	184304	92987	113970	105419	1.44908e+06	2.10051e+06	1.98824e+06	2.62312e+06	2.83914e+06	3.31513e+06	392093	273285	348743	731265	556595	482670	382411	216349	212429	380819	450631	298043	156872	247977	142454	179595	378968
(M-H)-	Methylmalonic acid	Organic acids and derivatives	43367.9	23130.1	34534.3	31369.1	21366.8	99555	81930.4	96637.9	105428	16172.8	14174.2	15574.7	95673	44103.5	364194	11418.9	12861.3	11114.2	278131	104856	96178.5	15772.9	14318	15748.6	58023.8	31388.1	32005.9	30677.3	48971	36207.7	67808.6	362504	419519	23098.8	32214.5	35669.2	457785	432164	357600	25495.2	37689.7	35329.1	496282	123020	405211	27629.4	40663.8
(M+CH3COO)-	Mevalonic acid	Lipids and lipid-like molecules	26057.2	17363.7	27520.5	20050.2	14316.4	26706.3	5058.64	16315.2	8627.81	10946.5	20804.2	9973.4	8121.87	6950.47	4952.95	37724.6	12946.5	6950.35	6512.5	7089.15	9722.53	12904.7	14130.9	19505.8	16690.8	17211.4	20515.8	16343.7	18013.1	16338.1	4170.68	4697.29	3527.79	8786.46	8536.05	8790.83	7391.48	4438.68	5495.4	7917.36	5901.56	6532.31	3447.13	4618.94	3832.11	10119.8	10108.7
(M-H)-	Monomethyl glutaric acid	Lipids and lipid-like molecules	19114.3	486.902	559.911	11548.4	458.935	636.816	575.387	645.81	782.731	673.941	1303.6	984.435	506.965	13286.6	548.505	988.875	1337.78	543.381	1274.16	1382.97	381.07	1717.44	1167.4	1119.11	716.596	235.673	624.937	937.536	945.927	917.605	412.71	722.747	482.549	1671.03	1507.07	1633.1	1130.35	834.16	928.655	1323.44	1282.93	1188.17	314.042	1044.97	1045.21	1374.71	1473.84
(M-H)-	myo-Inositol	Unclassified	9892.51	23435.6	30662.4	143968	32512.4	86504.7	23559.2	31393.2	31989.5	15937.6	16728.2	16412.6	25243.2	34919.1	41485	27151.3	23797.2	24116.3	44430.3	39982.4	45305	30100.6	30415.7	35965.1	27110.7	25614.4	28340.3	34999.6	10789.5	36456.1	30977.7	25535.6	24209.3	23548.3	22171	24103.9	42307.7	34087.6	39744.2	26385.1	29368.2	30408.8	36415.3	36018.2	35099.6	43590.9	34903.7
(M-H)-	Myristoleic acid	Lipids and lipid-like molecules	4598.88	3165.83	4178.33	4674.39	3258.59	2626.28	61937.8	38088.4	85672.7	6197.16	9988.61	8783.03	3.5916e+06	1.7767e+06	3.0111e+06	105106	127340	197105	6.12589e+06	4.59675e+06	6.34868e+06	316870	275034	366990	7537.41	27093.5	6452.75	11819.8	4904.19	4850.15	798785	1.3268e+06	1.14111e+06	152736	154071	253685	3.83675e+06	6.93754e+06	6.70376e+06	2.57767e+06	1.70621e+06	2.68369e+06	9.6381e+06	8.90052e+06	9.26891e+06	2.47038e+06	2.93903e+06
(M-H2O-H)-	N-Acetyl-D-glucosamine	Organic oxygen compounds	5043.53	5580.22	4044.93	9353.78	5932.58	6261.61	4162.62	16673.5	5040.98	10874	11117.7	4905.66	8546.94	8536.73	14837.2	8821.78	7260.9	6245.52	8284.14	20823.2	12878.1	15256.2	9556.53	10716.5	4756.08	3149.15	4388.75	13654.3	6490.86	17115.5	2240.31	5255.19	5006.87	6420.61	4231.08	16427.3	4418.6	3729.17	4690.99	19833.8	22133.6	14176.1	4667.75	7725.05	7461.41	9405.22	7455.59
M-	N-Acetyl-D-lactosamine	Unclassified	7043.07	6510.53	7615.99	7972.27	6031.91	10102.5	4071.98	80461.8	11561.9	6913.21	6051.38	8840.83	8074.2	4213.96	3529.15	7026.5	9248.98	5136.88	19241.2	16808.5	34928.2	5634.81	8090.15	18066.8	14597.5	17403.5	20317.2	26984.8	31393.2	42618	22613.9	16165.7	5033.32	6583.34	6765.41	5623.46	45980.5	17348.2	22570.6	31926.4	18785.2	25985	29335.3	15345.2	34658.6	16083.1	24162.7
(M+CH3COO)-	N-Acetyl-L-alanine	Organic acids and derivatives	6722.41	8346.58	9023.81	4355.92	5779.74	2425.03	8364.84	10675.8	11352.1	4063.14	5947.47	8357.89	9629.72	9868.03	9117.13	11256.7	8285.48	9025.76	13685.4	15862.1	7824.95	7130.31	8908.93	7491.86	3567.27	3324.95	3389.36	3815.04	2528.06	3079.39	3945.77	3751.27	2631.96	5986.9	6563.5	4395.47	3250.12	3416.17	4925.5	5570.66	5434.38	4336.25	4681.46	3290.47	5731.53	9126.17	14329.7
(M-H)-	N-Acetylglucosamine 1-phosphate	Organic oxygen compounds	3245.16	3372.69	2875.45	4169.41	4972.44	4645.48	3779.12	3493.14	4923.42	6843.32	5681.84	5634.73	9502.63	7973.56	6953.78	22055.8	15315.4	12048.1	13872.2	13697.9	10875.1	13540.1	16045.7	14924.2	3335.31	3701.24	2308.59	4220.39	3335.42	3833.66	3613.45	5358.26	3123.45	7643.02	6545.38	9560.77	16269.9	10037.6	14628.8	17917	13681.1	16290.2	12829.5	16688.6	16780	17449.2	18754
(M+CH3COO)-	N1-Methyl-2-pyridone-5-carboxamide	Organoheterocyclic compounds	1231.12	1635.72	865.842	2388.9	2568.69	2666.48	1995.41	1434.29	3717.32	2297.78	1880.97	1275.03	1364.61	2474.65	1956.82	3755.51	4851.97	2783.36	2732.86	1776.34	2054.91	2333.67	2779.4	3474.99	1754.29	1704.49	1576.08	3759.95	5986.8	4953.85	1499.54	1524.15	2329.55	3170.51	3132.41	4040.75	5098.81	2895.8	3128.55	5541.52	3514.26	4252.95	2949.27	2892.36	395.365	3965.46	4439.14
(M+Na-2H)-	Nicotinamide ribotide	Nucleosides, nucleotides, and analogues	1263.75	1920.95	1480.17	765.559	2035.22	1815.98	2425.4	2161.35	2532.85	2707.83	2745.12	1819.09	14715.2	8450.87	7943.55	14321	8506.74	7963.51	21863.4	23429.4	19634.5	14411.1	15631.8	14424.5	951.456	518.389	913.119	2174.21	1026.61	1356.5	2369.86	4835.39	1454.9	3428.56	2613.38	5094.3	9129.55	5862.61	11023.6	6066.43	3652.43	7128.77	11115.3	17432.6	17347	9821.79	10351.7
(M-H)-	Norethindrone Acetate	Unclassified	2.38449e+06	1.9213e+06	1.56678e+06	4.34329e+06	8.47246e+06	3.88165e+06	2.2737e+06	1.62339e+06	2.10435e+06	5.82791e+06	4.17187e+06	7.7534e+06	472831	904793	1.50442e+06	1.18288e+06	2.12327e+06	2.48701e+06	1.461e+06	718163	837247	2.27338e+06	1.72725e+06	1.92357e+06	1.32324e+06	1.56253e+06	2.73542e+06	3.99418e+06	2.48889e+06	4.02452e+06	1.52383e+06	4.6924e+06	1.71403e+06	8.95671e+06	6.6938e+06	6.80129e+06	1.06781e+06	900767	539774	2.81675e+06	4.27758e+06	2.1653e+06	806967	2.53195e+06	861008	3.19075e+06	2.00209e+06
(M-H)-	Oleanolic acid	Lipids and lipid-like molecules	12727.3	12979	7784.05	303072	420323	342464	48135.9	62340.1	21677.3	2.10802e+06	1.49041e+06	1.73512e+06	52552.5	94235.1	74355.6	96624.5	238277	2.53396e+06	367366	298813	223614	2.65097e+06	2.64867e+06	2.85821e+06	21033.4	34336.5	19501.9	537642	577785	623192	51757.1	58696.2	41269.9	2.47278e+06	2.76587e+06	2.77349e+06	10710.1	257708	265470	495881	3.04825e+06	2.41471e+06	69152.9	166219	120738	2.27588e+06	2.52683e+06
(M-H)-	Orotate	Organoheterocyclic compounds	2224.95	3706.73	776.225	1648.42	2438.51	1904.97	4314.26	3245.7	3815.67	10170.2	2813.4	3828.11	6474.61	37118.9	6334.23	32522.1	85664	12020.5	5799.02	5242.77	1951.16	7926.92	5872.91	4843.66	2261.87	2994.04	2781.64	2397.38	1029.56	2405.37	2219.71	2644.31	3483.14	8655.75	5987.59	6728.84	42198.5	19243.7	5727.44	106515	90172.9	48549.4	9423.44	2220.92	962.013	41420.4	33181
(M-H)-	Pantetheine	Organic acids and derivatives	1462.24	1382.52	1085.51	2737.06	3524.04	2644.58	953.293	1469.49	2205.34	1995.23	3014.23	1640.01	1059.4	1119.33	1091.7	3032.89	5013.33	1968.66	1626.76	630.036	1373.75	1733.77	1800.91	1745.17	2137.58	2770.56	2754.53	5983.67	5456.54	6585.5	852.813	1525.1	1222.23	3866.52	4381.55	3712.11	2232.32	1123.66	784.551	1694.09	3241.83	1571	709.081	762.179	1341.5	2933.3	2779.3
(M-H)-	Pantothenate	Organic oxygen compounds	90930.8	99636.5	60471.6	202876	274015	136829	278229	337274	478254	619878	689654	501174	255178	321365	292489	550474	545565	333243	357959	420098	320937	253738	294700	252121	82158.4	83950.2	82639.7	239246	224069	262351	255337	290263	233251	1.11729e+06	1.4213e+06	1.2946e+06	693790	383411	435923	1.35885e+06	1.01883e+06	994666	502051	457517	479445	1.13379e+06	1.19272e+06
(M-H)-	Phenylpyruvate	Benzenoids	61943.9	19421.1	42759.9	60704.5	94375.3	75303.4	8040.26	9814.04	14944.2	14414.7	9521.8	7378.69	10951.3	3162.3	12188.5	32388.9	20334.3	4461.77	5783.4	6658.4	7496.17	7571.23	9418.22	11237	53498.2	64187.7	50790.1	51420.3	104428	130052	4530.59	9591.49	9827.55	12738.4	9371.89	8932.23	7994.2	5244.11	11558.5	8961.57	11857.3	6902.03	9440.49	11767	10175.5	5434.08	16652
(M-H)-	Phloridzin	Unclassified	5115.92	3147.75	5140.11	1.23053e+06	1.05769e+06	899861	3503.58	7104.03	11497.7	583535	859196	378022	2439.26	3813.79	3053.1	359026	715275	418706	3736.53	7022.1	2837.42	419340	525872	419885	8015.84	7016.18	9685.39	553587	518263	498722	4150.48	5585.28	4355.54	218621	276409	293988	5524.2	4504.21	8675.38	227285	138784	281333	6346.5	6823.09	6297.94	185109	192673
(M+Na-2H)-	Phosphoenolpyruvate	Organic acids and derivatives	2338.72	855.442	1065.21	6898.96	7713.82	8189.65	1534.69	1691.05	2529.24	5467.26	6176.8	5877.83	954.011	1540.66	1135.7	5520.33	6645.46	5367.74	1768.38	1781.48	1216.03	3971.3	4861.99	5643.1	2527.07	2516.62	2134.63	6379.54	5954.15	5924.16	1997.23	3102.07	2266.09	6719.59	5290.98	6810.73	2212.2	1417.4	1857.61	5211	2474.37	3600.25	1701.49	1314.8	1061.15	3918.71	3660.44
(M-H)-	Procyanidin A2	Unclassified	56045.3	19190.2	34768.2	139114	238875	297235	17799.2	14907.5	25197.5	407924	909111	792052	6311.74	12045	16914.2	579707	914487	1.23643e+06	35802.3	12130.7	11462.8	645679	741299	725059	27586.2	33266.6	44102.9	83023.5	89232.5	41070.7	30889.4	18060.4	36548.1	188977	64383.3	193763	17046.1	19058.8	40786.3	222749	52699	180515	12137.8	23545.7	17693.1	126143	147075
(M-H)-	Procyanidin C1	Phenylpropanoids and polyketides	149388	222582	82770.8	393334	923142	244098	52861.7	65709.6	72658.9	1.3985e+06	3.40598e+06	924925	19117.3	55014.7	36389.2	6.1641e+06	3.62752e+06	2.61681e+06	48379.4	34196.9	12990.7	1.6088e+06	2.36648e+06	2.86099e+06	19994.4	51469.2	111771	31011.9	49659.4	50179	28826	44248.4	78155.9	187457	263665	130874	52149.6	42418.5	98631.5	961873	123446	280908	35197.1	43828	39466.9	465736	972633
(M-H)-	Propionic acid	Organic acids and derivatives	21348.6	22442.3	15649.4	21223.5	22775.8	20406.4	25129.6	31888.9	32538.5	21618.7	21412.8	18027	36011.7	44887.5	40556.4	28852.2	21787.9	15893.5	77345.8	74723.5	58361.1	34549	29606.7	22523	11417.1	13287.2	22828.5	17750.3	16782.1	21241.7	9982.79	9432.72	9866.74	28997.7	25408.2	17768.7	34666.8	21790.6	27484.1	15290.6	24264.1	19529.6	30205.1	41764.9	35287	24500.7	49094.6
(M-H)-	Pyridoxal (Vitamin B6)	Organoheterocyclic compounds	4810.48	2864.62	10840.8	19864.8	15909.7	18878.5	5467.02	7366.48	7569.97	24477.1	25293.9	18740	7387.53	10519.3	8894.68	27686.1	24383.4	22825.5	9839.38	12780	7784.2	19297.8	24347	23406.6	5545.81	6011.25	4475.15	6036.78	1568.37	5495.12	7691.84	7547.72	8522.91	10421.9	9216.38	8371.23	7426.93	6330.97	4831.26	14710.6	2541.35	13181.8	6914.96	5933.18	4658.33	10248.8	16517.4
(2M-H)-	Pyruvaldehyde	Organic oxygen compounds	2273.84	602635	1307.47	3175.3	3952.92	3913.49	1506.93	1396.33	1516.18	7502.7	7583.58	8700.86	701.953	799688	683.736	12212	9402.41	12064.7	3102.45	895661	800968	6183.45	199181	11177.7	1355.24	751791	682739	5952.04	4502.79	4290.49	833.892	1.02249e+06	1.0791e+06	282789	9402.37	295305	1.53248e+06	713.368	911988	416872	7050.78	7747.48	1286.59	1153.21	917705	6898.04	8041.82
(M-H2O-H)-	Ribitol	Organic oxygen compounds	4743.9	4314	5093.91	8441.8	2968.37	6304.9	1725.64	2693.07	5002.03	5264.87	6950.03	6883.26	4309.21	3586.48	3939.54	6082.39	7944.44	8683.25	2939.9	3018.97	2908.97	6140.35	7552.76	9914.95	4774.03	4107.47	3795.9	6885.01	4735.66	8860.25	3502.36	4091.67	3752.83	6025.68	8101.38	6589.61	3624.04	4432.19	3959.93	11782.1	4854.52	7150.45	6051.94	3861.97	4548.24	19829	7254.88
(M-H)-	Salidroside	Unclassified	670.129	1594.53	18869.8	12965.7	7921.52	5308.54	1120.78	2252.17	979.189	14868.4	33379	18856.6	1636.54	18493.8	1044.65	24967.1	28889	19106.7	139062	165988	109543	7576.19	15505.4	17091.2	3444.92	3694.8	2516.21	13662.7	13540.9	10740.8	1564.22	2948.48	2619.6	15102.2	14536.2	16146.6	4595.91	920.282	2967.2	8724.05	10025.3	5703.97	797.82	1072.88	1755.71	9006.72	7687.08
(M-H)-	Scytalone	Unclassified	14689.3	605.914	1365.39	1796.58	1595.51	10002.5	651.59	1767.23	2921.69	10423	11139.6	1101.66	992.2	1744.61	2146.99	8716.53	9511.51	5378.68	4422.7	5323.17	4334.67	12432.3	15073.5	11283	12911.8	15004.5	13685.2	2631.66	10672.1	3040.27	16704.1	13681.3	13855.9	10329.5	9031.15	1357.68	1134.61	13131.2	263.689	2298.39	11003.4	4288.09	1499.41	1255.77	755.494	4106.98	4585.58
(M+CH3COO)-	Sedoheptulose	Unclassified	2736.23	3454.34	2283.47	7254.19	6034.26	8920.41	4547.25	7005.48	5020	3712.16	825.138	3568.61	4778.87	5649.78	6976.36	5698.64	8001.85	9561.57	7037.96	9143.22	7030.46	7483.13	7435.42	11711.7	4209.8	3721.25	3446.23	3669.76	3551.3	5136.02	5788.36	6805.58	6086	7841.6	5494.46	6897.09	6594.58	4378.22	5061.81	5555.3	5389.54	6024.35	4662.61	5521.22	4772.09	8442.45	6243
(M-H)-	Shikimate	Organic oxygen compounds	31194.9	36884.1	23013.8	26280.4	36466.5	24375.4	11214.7	13349.3	12549.8	11040.4	10970.4	6877	14874	13464.7	13387.8	16394.2	11470.7	9001.44	14144.6	16048.2	11948.2	8932.05	10267.8	9850.05	29721.7	36860	36356.8	31642.7	31325.4	33243.2	6984.11	9766.34	7244.74	12134.2	12884.6	13046.1	18446.1	14743.3	17616.4	17126.2	21198.7	16008.1	12327.4	16932.5	14496.8	17481.2	22563.3
(M-H)-	Sinapic acid	Phenylpropanoids and polyketides	948.669	769.732	940.016	9611.99	10963.6	11399.5	1055.95	1413.73	1374.95	21973.1	32788.2	16990.2	3894.18	1606.09	3929.36	25324.2	28192	16825	6010.47	2834.25	4583.27	14825.1	13932.7	14688.2	1300.61	908.502	1531.21	6494.05	6649.07	6942.22	1061.83	1759.62	1491.09	10083.8	10458	13709.1	5051.3	3724.19	5075.37	23536.2	14926.9	18845.2	5525.89	5525.93	4399.88	17335.4	19181.5
(M-H)-	Sinapyl alcohol	Benzenoids	2315.11	1880.26	1761.33	2152.27	2959.32	4768.85	2297.83	3536.04	5101.43	18731.5	24344.9	12498.9	2617.46	3610.74	2589.39	15891.8	26573.3	10299	3375.65	4313.21	2670.37	12075.4	11519.3	10292.7	3712.01	3616.14	2890.81	2502.4	3642.34	3583.2	3772.27	4572.36	4018.82	20635.6	18083.1	19516.6	8251.59	4330.77	4429.83	20105.2	16277.2	23866.8	4355.34	5644.94	1126.85	25848.2	21497.4
(M-H)-	sn-Glycerol 3-phosphoethanolamine	Unclassified	6748.99	5033.42	5213.82	9561.47	6637.59	10330.1	23104.7	18740.1	36510.7	14765.7	10814.1	14627	77446.6	57271.2	54014	89967	38258.8	52464.9	334747	247429	225244	120861	126758	127061	9621.73	6276.44	7299.93	20144.7	14120.5	20949.3	25979.3	43246.2	19958.9	24530	20540.9	36765	128638	83931.9	147270	57771.9	31586.8	54494	153039	200716	216299	97877.8	80801.6
(M-H)-	Succinate	Organic acids and derivatives	17111.3	27679.4	15422.3	8221.65	8694.06	8085.95	18066.4	41057.5	14880.9	7155.51	7517.28	6475.51	7901.49	10528.1	12681.6	6210.56	7705.41	6498.89	8686.71	10291.5	8273.22	9255.88	7686.96	7015.53	13248.2	18280.7	14056.1	10584.5	10075.3	9897.85	18032.4	11821.1	12011.2	8584.1	9529.76	9227.94	8719.94	8423.88	7855.97	8907.6	7752.34	8259.92	12263.7	10117.8	6716.65	9975.26	11102.4
(M-H)-	Trehalose	Organic oxygen compounds	60323.4	44065	51785.4	75112.3	47028.7	78303.2	103012	117815	84504.3	72966.1	77721.5	59790.1	199064	509383	198449	319749	134618	320727	584816	587838	526717	1.44226e+06	421377	281982	52212.8	52053.6	44421.5	105645	57031	63488.8	54771.7	138070	62923.8	67416.8	70573.6	78668.4	625664	258840	2.84452e+06	302048	281306	162369	445048	404532	408507	486261	299928
(M-H)-	UDP-N-acetylglucosamine	Nucleosides, nucleotides, and analogues	3737.89	4062.93	2972.06	7366.82	8003.56	5675.6	2399.89	2919.11	4621.91	5409.6	5387.43	4230.08	11717.6	9280.06	7506.43	13395.5	10822.7	9084.69	31636.9	41704.2	22731.8	12337.4	24636.9	18784.9	3662.28	3735.33	4506.14	6178.03	6194.47	7816.09	3533.7	4771.15	2554.93	8466.4	5270.11	8379.91	36436.7	18802.3	27971.2	12241.3	10481.2	12551.3	20129	35968.8	38095.8	15088.3	15693.7
(M-H)-	Uracil	Organoheterocyclic compounds	5245.19	5580.18	4691.33	4181.07	4354.56	4462.22	3702.21	8869.03	11909.9	20813	4579.32	7814.86	7365.3	38492.4	5714.31	67523.5	173844	30368	5255.3	5321.31	8994.47	14622.8	11561.9	8546.2	6151.03	6669.17	6094.01	4972	4770.44	5193.99	9711.04	9860.11	9537.87	13890.4	10469	10807.5	39128.7	18984.2	5451.77	186537	152373	82943.6	7683.09	9477.24	9513.51	65459	53504.3
(M-H)-	Uridine 5'-diphosphoglucuronic acid (UDP-D-glucuronate)	Nucleosides, nucleotides, and analogues	413.251	498.23	433.918	133.517	482.954	473.396	343.827	551.655	487.705	469.84	340.012	473.033	705.852	1007.7	616.773	6265.27	2821.48	897.05	411.145	561.26	422.462	438.028	1047.35	1370.64	33.221	97.444	201.938	203.884	356.193	170.161	275.851	234.403	269.054	371.081	231.665	527.639	297.611	561.822	597.17	649.915	313.523	572.87	487.881	651.313	624.915	593.991	448.685
(M-H)-	Uridine 5'-monophosphate (UMP)	Nucleosides, nucleotides, and analogues	2236.81	2254.85	2113.57	3750.39	3147.7	4332.9	2850.16	4186.3	3963.55	3032.57	2899.65	2978.01	7941.3	6931.3	4841.69	3905.73	5612.44	5025.08	14755.1	15407.3	11667.1	4112.09	3871.12	5452.42	1480.51	1772.8	1614.96	2992.23	3087.14	2765.06	2651.53	3146.75	2581.97	2369.58	2533.55	2612.74	7008.1	5681.46	6950.04	3469.67	2838.17	2960.7	7563.39	8444.17	9013.72	3744.08	6215.43
(M-H)-	Uridine diphosphate glucose(UDP-D-Glucose)	Nucleosides, nucleotides, and analogues	29945	27368	22476.9	47799.2	47834.6	62563.4	25756.5	36248.2	57494.5	42015	42184.1	33220	44402.5	88188.2	47514.1	61178.3	70186.6	52121.7	62172.4	81472.9	65386.2	24705.7	38986.2	41527.7	15675.4	13219.5	17661	51418.2	54595.9	47230.7	21260.9	27970.1	20868.8	33875.9	36468.9	37017.9	56367.8	32430.5	42958.1	26165.7	23872.7	21817.5	31761.6	31752	32256.8	17557.8	19706.7
(M-H)-	Valeric acid	Lipids and lipid-like molecules	24859.2	7172.26	22344.7	22934.7	7755.66	25701.8	26394.9	27283	32174.4	18986.9	19207.4	12705.3	17538.5	10911.6	36481	14982	22223.2	18195.2	33076.6	33381.1	29608.5	15388.1	17197	19335.7	20508	22690.4	30761.3	25093	27433.7	23679.8	8071.14	25153.7	17723.4	21526	17083.6	15453.9	30768.6	28653.2	30130.6	17514.7	19885.5	22342.4	25648	32524	29655	19978.9	22384.3
(M-H)-	Xylitol	Organic oxygen compounds	22599.5	21317.2	19363.8	25854.7	26704.4	23516.4	5440.68	6411.03	8217.16	5890.23	6536.55	4637.63	2042.21	2960.64	3382.02	3488.29	1853.18	1902.67	1637.22	1611.66	1849.13	1476.23	1628.01	1306.11	16209.5	19873.7	16485.7	24303.1	23484.4	25135	3753.32	4910.04	4448.48	5657.13	6119.66	6032.16	3774.45	2193.22	2396.13	3811.3	4543.7	3951.3	1469.88	1776.75	1334.66	3277.38	5434.49
(M-H)-	L-Glutamine	Organic acids and derivatives	4387.36	4330.78	4341.28	5411.75	8988.07	9825.49	10906.4	10788.1	24763.1	32701.5	35426.8	34798.3	22398.7	25634.9	25640.6	55880.2	57092.6	42681.6	53468.4	57601.3	39210.4	41621.2	55683.4	54388.3	2784.2	2892.46	2559.17	7730.1	7662.47	10184.7	50575.4	45650.2	44297.1	67946	52646	59816.8	83347.4	53289.5	55829.1	41216	34214.3	31641.6	53324.7	56965.8	37831	41854.3	45638.1
(M-H)-	L-Pyroglutamic acid	Organic acids and derivatives	159006	47170.2	131644	104530	75197.9	142142	53132.8	58403.2	75418.3	47075.8	37104.9	48647.4	213355	115566	199375	94194	91509.9	62693	261727	284112	221963	157054	155507	146927	132640	147830	115149	241502	220469	251911	97521.6	122774	90916.8	216860	178875	240315	446888	294877	431736	433791	611386	577973	348350	415144	399158	492021	606222
(M-H)-	3',5'-Cyclic guanosine monophosphate	Nucleosides, nucleotides, and analogues	1499.92	2198.09	1661.99	1118.88	1671.57	3445.01	1841	1740.9	2308.42	3774.57	4007.95	3886.02	20295.3	9046.91	12437.2	35089.1	22141.9	26208.5	77924.5	69119.5	78575.3	85561	92625.8	135708	1397.28	1340.22	1158.74	1259.26	1252.57	886.063	3921.78	6833.32	2880.44	9253.49	8791.96	12790.8	95869	51038.2	66082.7	161434	114423	126612	109202	102424	113469	240424	254391
(M-H2O-H)-	Cytidine 5'-monophosphate (CMP)	Nucleosides, nucleotides, and analogues	917.614	911.986	633.498	198.923	492.112	96.0276	718.63	919.097	589.849	503.361	310.364	264.732	2550.25	1836.41	1956.12	6547.58	3056.86	3442.91	7610.57	6824.64	7676.57	11096.9	8844.5	16684.3	649.056	1258.23	739.774	201.987	420.413	235.246	1163.37	1170.66	884.876	1769.93	1204.16	2557.98	19965.3	10740.6	13069.8	45844.3	27514.7	30389.7	21150.6	15309.5	16589.5	59334.8	53128.1
(M-H)-	Phloretin	Phenylpropanoids and polyketides	1568.83	1651.88	1566.73	267073	213381	209983	1328.76	1961.73	2023.52	137431	225762	88798.4	1573.61	1389.77	1555.85	166567	75375.3	106148	1771.31	2555.48	1722.97	99981.8	126150	96593	1685.68	1883.68	1819.7	176883	142800	154039	1316.46	1414	1489.81	53323.8	65653.4	66301.7	2647.79	1911.26	2266.01	59372.5	34166.8	63730.3	1682.65	1035.62	1871.73	41620.5	44290.1
(M-H)-	D-Proline	Organic acids and derivatives	7059.06	8554.42	7926.04	1835.79	6494.66	6618.51	60848.7	97205.2	75483.5	96112.6	123178	68058.2	2.77901e+06	2.84657e+06	2.14976e+06	4.42885e+06	3.71055e+06	4.01617e+06	7.11541e+06	8.50149e+06	5.96447e+06	6.29253e+06	7.45829e+06	7.38474e+06	19549.2	21043.8	10534.4	10509.5	11016.1	12995.9	90030.6	86634.2	58921.4	150588	101984	157379	1.22056e+06	1.59144e+06	2.18092e+06	1.70872e+06	1.57204e+06	2.50719e+06	2.89437e+06	5.62363e+06	4.84716e+06	3.29064e+06	3.77415e+06
(M-H)-	2'-Deoxyadenosine 5'-monophosphate (dAMP)	Nucleosides, nucleotides, and analogues	2816.71	2098.27	1717.97	2943.64	5653.49	3136.1	1561.38	1749.99	2004.83	1855.96	2087.09	3185.39	912.581	1501.91	1339.87	2232.14	2702.86	2153.79	1157.58	1420.88	1976.98	3085.14	1970.51	1419.86	1543.58	1662.95	2309.84	3499.96	2767.13	2249.78	1590.32	1511.72	1261.05	2369.32	2441.57	2824.2	1547.66	1501.06	1700.39	2128.07	1591.6	1860.08	1609.74	2069.29	1595.52	1674	2446.65
D: ‘Dongzao’. P: ‘P15’. E: exocarp. M: mesocarp. E: enlargement. G: green mature stage. W: white mature stage. H: half red stage
[truncated: 6 more columns]

## Sheet: Table S2A
Table S2A. The information about all DAMs in the exocarp.
Group	Description	VIP	P-value	Group	Description	VIP	P-value	Group	Description	VIP	P-value	Group	Description	VIP	P-value
D_E_E vs P_E_E	(-)-Epicatechin	25.5366	0.000106317	D_E_G vs P_E_G	(-)-Epicatechin	26.7844	0.0130789	D_E_W vs P_E_W	16-Hydroxypalmitic acid	1.50571	0.00337888	D_E_H vs P_E_H	(-)-Epicatechin	2.77323	0.0337202
	(+)-Catechin	2.05711	0.021128		(+)-Catechin	2.77619	0.0496062		Adenine	1.01339	0.043879		16-Hydroxypalmitic acid	1.6321	0.0251494
	1-Aminocyclopropanecarboxylic acid	1.32398	0.000310239		(4Z,7Z,10Z,13Z,16Z,19Z)-4,7,10,13,1 6,19-Docosahexaenoic acid	1.04784	0.00412918		Adenosine monophosphate (AMP)	3.29379	0.00304051		25-hydroxyvitamin D3	2.69652	0.0294495
	1,3,5-Benzenetriol	1.10801	0.00129559		.alpha.-D-(+)-Talose	1.04087	0.0010655		Anthranilic acid (Vitamin L1)	3.60677	0.000974175		3.alpha.-Mannobiose	1.24364	0.0146291
	16-Hydroxypalmitic acid	1.66391	0.0152014		16-Hydroxypalmitic acid	1.29189	0.0364205		Benzamide	3.66671	0.000531911		4-Guanidinobutyric acid	4.99881	0.000104807
	Acetylglycine	1.06312	8.9319e-05		4-Guanidinobutyric acid	5.0657	0.0015978		Erucamide	2.94885	0.00290512		Adenine	1.38089	0.015093
	Adenine	2.57169	4.35059e-05		Adenine	1.42718	2.68232e-05		Gentisaldehyde	2.20675	0.0282599		Adenosine monophosphate (AMP)	4.11035	0.00651936
	Adenosine	3.29121	0.00251086		Anthranilic acid (Vitamin L1)	2.58332	0.0283745		Hypoxanthine	1.53053	0.0029838		Anthranilic acid (Vitamin L1)	3.15476	0.000524218
	Anthranilic acid (Vitamin L1)	3.84492	0.0201525		Benzamide	3.76547	0.0203239		Maslinic Acid	5.2919	0.000330169		Benzamide	2.76385	0.00930914
	Benzamide	3.023	1.0355e-05		Choline	1.4305	0.0190783		Nicotinamide	1.02732	0.0109698		Desmosterol	2.38451	0.00841259
	Choline	2.87723	0.0107318		Desmosterol	2.20108	0.00142887		Sapindoside A	6.28037	0.0208809		Erucamide	2.86885	0.00404325
	Desmosterol	1.52434	0.00218307		Diethanolamine	4.17533	0.00155995		trans-3-Coumaric acid	1.19114	0.0394774		Hypoxanthine	1.72182	0.0126229
	Diethanolamine	3.71259	0.012121		Gentisaldehyde	7.59014	0.00509928		(-)-Epicatechin	7.1481	0.0524296		Maslinic Acid	6.24313	0.00978294
	Gentisaldehyde	7.53459	0.000331563		Glycerophosphocholine	4.87082	0.0305629		1,2-dioleoyl-sn-glycero-3-phosphatidylcholine	1.16708	0.0542004		PC(16:0/16:0)	2.2804	0.0198681
	Glycerophosphocholine	3.30886	0.00502405		Homogentisic acid	1.80263	0.0339731		4-Guanidinobutyric acid	4.7331	0.0536146		Sapindoside A	5.29549	0.000269839
	Homogentisic acid	1.69276	0.000317025		L-Arginine	1.90414	0.0432449		Desmosterol	1.70731	0.0638037		Thioetheramide-PC	3.06435	0.0148097
	L-Asparagine	1.03799	0.0120255		Maslinic Acid	3.83201	0.0243399		Peonidin 3-galactoside cation	1.1978	0.0646973		trans-3-Coumaric acid	2.58494	0.0435002
	Maslinic Acid	1.47205	0.00313132		Nicotinamide	1.3284	6.03234e-05		2,3-Dihydroxy-3-methylbutyric acid	1.09258	0.00142122		Agmatine	8.61896	0.0646289
	N-Acetyl-L-glutamate	11.7635	0.0036521		Sapindoside A	8.72567	0.0055398		3',5'-Cyclic guanosine monophosphate	1.12078	0.00188569		Betaine	1.75489	0.0678925
	Nicotinamide	2.50873	0.000145037		Thioetheramide-PC	2.55322	0.00344255		3-Hydroxypropionic acid (beta-lactic acid)	2.66601	0.00728236		Gentisaldehyde	1.83481	0.0590125
	Phytosphingosine	2.69557	0.00824765		trans-3-Coumaric acid	4.23977	0.0153459		4-Hydroxycinnamic acid	1.85067	0.00895263		Maltotriose	2.15458	0.0993468
	Quercetin	4.47431	0.0208579		Val-Thr	1.21086	0.000124287		Adenosine 3',5'-cyclic phosphate (cAMP)	3.38267	0.00634232		2'-Deoxy-D-ribose	1.12137	0.000929431
	Sapindoside A	11.9475	0.00138719		25-hydroxyvitamin D3	3.06511	0.056193		Alpha-D-Glucose	7.63634	0.00490383		2-Dehydro-3-deoxy-D-gluconate	1.3795	0.00179165
	trans-3-Coumaric acid	4.53827	0.00063723		PC(16:0/16:0)	2.59641	0.0505083		Capric acid	1.70692	0.0493019		2,3-Dihydroxy-3-methylbutyric acid	1.02886	0.00750444
	Val-Thr	3.33451	0.00033722		Citrate	5.51721	0.0122827		cis-9-Palmitoleic acid	6.28423	0.000342432		3',5'-Cyclic guanosine monophosphate	1.52673	0.00186891
	5-L-Glutamyl-L-alanine	1.1686	0.081035		Citric acid	2.10324	0.00526766		Citric acid	1.35139	0.0403181		3-Hydroxypropionic acid (beta-lactic acid)	2.57393	0.00351424
	Thioetheramide-PC	3.04789	0.0874156		D-Arabinono-1,4-lactone	1.4545	0.000290719		D-Arabinono-1,4-lactone	1.13018	0.0271633		4-Hydroxycinnamic acid	2.30539	0.000278928
	(+-)-Taxifolin	1.03972	0.0299714		D-Fructose	1.29716	0.0106875		D-Fructose	1.21438	0.0403989		Adenosine 3',5'-cyclic phosphate (cAMP)	4.06041	0.00531941
	2'-Deoxy-D-ribose	3.26917	0.0067612		D-Galactarate	4.1665	0.00108172		D-Galactarate	3.686	4.57055e-05		Alpha-D-Glucose	7.95957	0.00119648
	3-Hydroxypropionic acid (beta-lactic acid)	2.21708	0.0290723		D-Lyxose	1.08688	9.88688e-05		D-Mannose	1.25195	0.0164157		Capric acid	1.95161	0.000111207
	4-Hydroxycinnamic acid	1.77621	0.00173024		D-Mannose	1.44908	0.0121508		D-Mannose 1-phosphate	1.18387	0.0201027		cis-9-Palmitoleic acid	7.69261	0.00162617
	Aloin A	2.01314	0.000511856		D-Tagatose	1.8464	0.00152802		D-Proline	3.02769	0.00406692		Citrate	8.07444	0.00210689
	Alpha-D-Glucose	7.14882	0.00307529		Dehydroascorbic acid (Oxidized vitamin C)	9.07625	0.00275304		D-Tagatose	1.91545	0.000755493		Citric acid	1.2293	0.0098465
	cis-9-Palmitoleic acid	1.13097	0.0081326		Dihydrouracil	2.60829	0.0195921		Dehydroascorbic acid (Oxidized vitamin C)	9.57992	0.00534037		D-Arabinono-1,4-lactone	1.18374	0.0103823
	Citramalic acid	1.23654	0.0237449		Dihydroxyacetone	1.1368	0.0117381		Dihydroxyacetone	1.36784	0.00241455		D-Galactarate	4.46746	0.000539363
	D-Arabinono-1,4-lactone	1.42259	0.036522		Embelin	1.2644	0.0269403		Dodecanoic acid	2.99265	0.00531339		D-Lyxose	1.04048	0.0145167
	D-Fructose	1.39765	0.000910322		Erythritol	1.06179	0.0146309		Embelin	2.9646	0.00752074		D-Mannose	1.4267	0.00374938
	D-Galactarate	5.71652	0.00457752		Glyceric acid	1.24636	0.00689605		Glyceric acid	2.46067	0.00504727		D-Proline	5.41954	0.00332819
	D-galacturonic acid	1.19905	0.00122633		L-Glutamate	1.23355	0.0228711		Homocitrate	1.82588	0.0144321		D-Tagatose	1.95023	0.00367783
	D-Lyxose	1.02283	0.00117288		L-Gulonic gamma-lactone	1.97135	0.0441177		L-Glutamate	1.62532	0.0279342		Dehydroascorbic acid (Oxidized vitamin C)	11.8662	8.56253e-05
	D-Tagatose	1.8534	0.00373565		L-Pyroglutamic acid	1.56674	0.000780254		L-Gulonic gamma-lactone	1.99637	0.0109034		Dihydroxyacetone	1.12909	0.00487578
	Dehydroascorbic acid (Oxidized vitamin C)	13.7106	0.00997439		Maleamic acid	1.74313	0.020622		L-Pyroglutamic acid	2.32295	0.00116696		Dodecanoic acid	3.49298	0.00016519
	Dihydroxyacetone	1.69654	0.0100362		Malonic acid	1.55191	0.0371174		L-Threonate	4.18975	3.27209e-05		Glyceric acid	2.43777	0.0162479
	Indolelactic acid	1.00405	0.0490534		Mesaconic acid	3.45401	0.0217547		Malonic acid	1.91998	0.00243205		Homocitrate	2.60644	0.0110351
	L-Glutamate	2.19136	0.000202925		myo-Inositol	2.83032	0.0059999		myo-Inositol	2.40733	0.0192892		Indolelactic acid	1.17644	0.00969603
	L-Pyroglutamic acid	1.64875	0.00368344		Myristoleic acid	1.54953	0.00593796		Myristoleic acid	4.89979	0.00218094		L-Pyroglutamic acid	2.41774	0.000287883
	L-Threonate	4.21495	0.0124407		Oleanolic acid	4.34387	0.0121139		Oleic acid	2.13735	0.00736074		L-Threonate	4.71424	0.00642986
	Malonic acid	2.56896	0.0210058		Pantothenate	3.39926	0.00291124		Pantothenate	2.94811	0.0092749		Malonic acid	1.68677	0.0135583
	N-Acetyl-L-phenylalanine	2.16662	1.41657e-07		Procyanidin A2	2.17602	0.0243526		Procyanidin A2	2.36646	0.0181268		Myristoleic acid	5.84711	6.98287e-05
	Oleanolic acid	2.37817	0.00613051		Procyanidin B2	3.25686	0.001366		Procyanidin B2	3.62502	0.00121136		Oleic acid	3.78228	0.0092403
	Oleic acid	1.86646	0.023329		Pyruvaldehyde	1.01467	0.0155053		Procyanidin C1	4.97614	0.0275517		Pantothenate	3.46135	0.00024103
	Phloridzin	1.40756	0.00509577		Rutin	2.52283	0.0138532		Pyruvaldehyde	1.11049	0.000456654		Phloridzin	1.63878	0.00200647
	Procyanidin A2	2.74695	0.00015543		Stearic acid	1.68346	0.0172798		Rutin	2.0817	0.0453885		Procyanidin A2	2.63964	6.35298e-05
	Pyruvaldehyde	1.15133	0.01921		Galactinol	3.90857	0.0610817		2-Dehydro-3-deoxy-D-gluconate	1.47763	0.0807958		Procyanidin B2	3.57039	0.0142259
	Traumatic Acid	1.10243	0.00589937		L-Asparagine	1.66395	0.0648004		Citrate	6.75111	0.0750714		Procyanidin C1	4.37077	0.0152871
	2-Oxoadipic acid	1.78206	0.0805687		L-Threonate	4.94208	0.0654081		D-Lyxose	1.12226	0.0588934		Pyruvaldehyde	1.10985	0.00805558
	Citric acid	1.91331	0.0724169		Oleic acid	1.23711	0.0836012		Erythritol	1.00185	0.0750011		Raffinose	2.00386	0.000832635
	Procyanidin B2	8.05647	0.0544517		Phloridzin	1.2872	0.071599		Indoleacrylic acid	1.62807	0.0947531		Rutin	6.32952	0.00629751
	Procyanidin C1	2.028	0.0818473		Procyanidin C1	3.56606	0.0873221		Indolelactic acid	1.98247	0.0850894		Stearic acid	1.32603	0.00189825
	Quinate	2.1025	0.0605091						Phloridzin	1.0383	0.074833		Xanthine	1.27303	0.00873126
	Rutin	2.97067	0.0559257						Stearic acid	1.04704	0.0910481		D-Fructose	1.10341	0.0720768
													L-Glutamate	1.50945	0.0658918
													L-Gulonic gamma-lactone	1.64974	0.0613006
													L-Malic acid	5.70055	0.0733569
													myo-Inositol	2.6482	0.0906511
D: ‘Dongzao’. P: ‘P15’. E: exocarp. E: enlargement. G: green mature stage. W: white mature stage. H: half red stage

## Sheet: Table S2B
Table S2B. The information about all DAMs in the mesocarp.
Group	Description	VIP	P-value	Group	Description	VIP	P-value	Group	Description	VIP	P-value	Group	Description	VIP	P-value
D_M_E vs P_M_E	4-Aminobutyric acid	1.33234	0.000922146	D_M_G vs P_M_G	.beta.-Homoproline	2.03049	0.00107984	D_M_W vs P_M_W	.beta.-Homoproline	2.24065	0.00167838	D_M_H vs P_M_H	.beta.-Homoproline	1.903	0.0418056
	5-L-Glutamyl-L-alanine	5.71298	0.00632274		16-Hydroxypalmitic acid	3.55253	0.0136867		1-Indanone	1.1336	0.00240582		16-Hydroxypalmitic acid	2.0866	0.00306228
	6-Aminocaproic acid	1.38555	0.00029561		2-Hydroxyadenine	1.01234	0.00288328		16-Hydroxypalmitic acid	2.36879	0.00324359		4-Guanidinobutyric acid	6.44403	0.0352828
	Adenine	5.95541	0.00519453		4-Guanidinobutyric acid	8.75069	0.0126934		2-Hydroxyadenine	1.02421	0.00075185		6-Aminocaproic acid	1.413	0.000844708
	Diethanolamine	2.96566	0.000447077		Adenosine	6.4687	0.0428757		4-Guanidinobutyric acid	6.08154	0.00157423		Adenine	1.28451	0.00251095
	Isomaltose	1.5097	0.0322012		Anthranilic acid (Vitamin L1)	3.38615	0.0483421		Adenosine	7.78375	0.00359161		Adenosine	9.66318	2.83696e-07
	L-(-)Sorbose	1.41003	0.0415224		D-Mannose-6-phosphate	1.19491	0.038757		Adenosine monophosphate (AMP)	3.02342	0.00253276		Adenosine monophosphate (AMP)	2.86765	0.0108707
	N-Acetyl-L-glutamate	5.49147	0.00257695		Diethanolamine	3.32976	0.0187956		alpha-Linolenic acid	1.1577	0.000464527		Agmatine	5.29717	0.0371773
	N-Acetylglutamine	1.61815	0.00594953		His-Thr	3.8994	0.0251733		Anthranilic acid (Vitamin L1)	4.25748	0.0181473		Anthranilic acid (Vitamin L1)	5.94598	0.00892077
	Naringenin-7-O-Glucoside	2.30709	0.00107264		Hydroxyproline	1.51884	0.0468058		Diethanolamine	1.04614	0.00289121		Argininosuccinic acid	1.65453	0.00286354
	NG,NG-dimethyl-L-arginine(ADMA)	1.02581	0.0260526		Hypoxanthine	1.03504	0.0190273		Glycerophosphocholine	5.07436	0.00255595		His-Thr	1.38784	0.00279216
	Nicotinamide	5.18961	0.0035933		Perillyl alcohol	1.06297	0.0243658		Hydroxyproline	1.35554	0.0455213		Hydroxyproline	1.55417	0.00514027
	Pantothenol	7.04747	0.00270682		Phytosphingosine	1.98416	0.0328078		Hypoxanthine	6.06036	1.03094e-06		Hypoxanthine	6.18866	0.000130095
	Phosphorylcholine	1.53202	0.0308793		(-)-Epicatechin	9.11503	0.0721108		Maltotriose	2.56332	0.0058973		Kaempferol	1.08693	0.000103912
	Scopoletin	2.65972	0.00305631		Adenine	8.16127	0.0560146		Maslinic Acid	1.15636	0.0217564		L-Asparagine	2.22992	0.0851189
	Triethanolamine	1.18068	0.0107741		alpha-Linolenic acid	1.10484	0.0707678		Phytosphingosine	1.1544	0.000645966		Maltotriose	1.33614	0.0734723
	Val-Thr	1.53075	0.0104925		trans-3-Coumaric acid	1.47053	0.0832417		Scopoletin	2.51292	0.00867372		Nicotinamide	1.59463	0.0887312
	(-)-Epicatechin	12.2771	0.0648247		(+-)-Taxifolin	1.13335	0.0291696		(-)-Epicatechin	8.96708	0.087348		2'-Deoxy-D-ribose	2.0156	0.00907998
	Agmatine	7.79488	0.0931974		2'-Deoxy-D-ribose	1.64304	0.043453		Argininosuccinic acid	1.8018	0.0621031		3',5'-Cyclic guanosine monophosphate	1.26281	0.00170584
	Gentisaldehyde	3.47982	0.0896441		2'-Deoxyinosine 5'-monophosphate	2.6229	0.00903791		Gentisaldehyde	1.1728	0.0933428		Acetylvalerenolic acid	1.83554	0.000506255
	Glycerophosphocholine	2.01658	0.0630771		2,3-Dihydroxy-3-methylbutyric acid	4.35117	0.00643503		His-Thr	1.7657	0.086061		Adenosine 3',5'-cyclic phosphate (cAMP)	3.08877	0.00282743
	Morin	1.07882	0.0690562		3-Hydorxy-3-methylglutaric acid	2.63756	0.00457255		L-(-)Sorbose	1.16357	0.0539155		alpha-D-Galactose 1-phosphate	1.46086	0.000902012
	Thioetheramide-PC	1.45068	0.0669791		alpha-D-Galactose 1-phosphate	1.22753	0.00555028		N6,N6,N6-Trimethyl-L-lysine	2.33924	0.0528337		Ammelide	1.43136	0.00124964
	(+-)-Taxifolin	1.11174	0.00567993		Beta-d-lactose	1.07584	0.028627		trans-3-Coumaric acid	1.50206	0.0958143		cis-9-Palmitoleic acid	19.7859	0.00643371
	2'-Deoxy-D-ribose	1.39517	0.0285458		cis-9-Palmitoleic acid	19.6551	0.00148956		(+-)-Taxifolin	1.11206	0.0186027		Citramalic acid	2.79255	0.0133319
	2-Oxoadipic acid	1.11553	0.00114332		cis-Aconitate	2.96004	0.0051666		2'-Deoxy-D-ribose	2.04875	0.0399408		D-Mannose	5.16561	0.000260219
	D-Fructose	1.18018	0.0244312		Citramalic acid	1.99164	0.0186893		3',5'-Cyclic guanosine monophosphate	1.38223	0.0136934		D-Tagatose	1.85013	0.000346975
	Dehydroascorbic acid (Oxidized vitamin C)	24.4079	0.0232178		D-galacturonic acid	1.30881	0.00178741		Acetylvalerenolic acid	1.33842	0.00111438		Dehydroascorbic acid (Oxidized vitamin C)	10.8183	0.0314423
	Dihydrouracil	1.29853	0.00974365		Dihydrouracil	4.13565	0.0253422		Adenosine 3',5'-cyclic phosphate (cAMP)	3.45962	0.0101986		Dihydrouracil	3.32367	0.0362916
	Dihydroxyacetone	3.32023	0.00735325		Dodecanoic acid	3.89654	0.0116907		alpha-D-Galactose 1-phosphate	1.57986	0.0176416		L-Ascorbic acid	10.8954	0.00579835
	Galactinol	4.92563	0.032541		L-Glutamine	1.38184	0.00333861		Citramalic acid	2.08593	0.00835074		L-Glutamate	3.25536	0.00188422
	Glyceraldehyde	1.03236	0.00312914		L-Malic acid	1.02734	0.0462541		D-Galactarate	5.95236	0.0146584		L-Gulonic gamma-lactone	1.65841	0.00136645
	Indoleacrylic acid	1.59523	0.0283129		L-Pyroglutamic acid	1.59447	0.0247286		D-Mannose	3.75125	0.0355705		L-Pyroglutamic acid	2.52373	0.00832542
	Indolelactic acid	1.78254	0.0103458		L-Threonate	6.74825	0.043455		D-Tagatose	1.45947	0.0205332		L-Threonate	4.88734	0.017488
	L-Asparagine	2.15475	0.0259779		Maleamic acid	2.92408	0.0222747		Dodecanoic acid	5.46094	0.00469965		Maleamic acid	2.19262	0.0389259
	L-Threonate	7.33236	0.0104678		Malonic acid	1.01992	0.041816		Erythritol	1.57613	0.00525413		myo-Inositol	10.0813	0.000128242
	Linoleic acid	7.12289	0.00149998		Mesaconic acid	7.24955	0.000607739		Glyceric acid	2.93783	0.0416897		Myristoleic acid	12.8775	0.00373871
	Malonic acid	4.62025	0.0111787		Myristoleic acid	7.66212	0.00270768		Indolelactic acid	1.18157	0.035882		Oleanolic acid	2.39024	0.0237739
	N-Acetyl-L-phenylalanine	2.35997	0.00020133		N-Acetyl-L-phenylalanine	1.09923	0.000653204		L-Asparagine	6.81526	0.0465286		Oleic acid	7.16339	0.0160995
	Oleic acid	3.46424	0.0234852		Oleic acid	11.8469	0.00532304		L-Glutamine	1.13449	0.0149901		Pantothenate	2.37341	0.023165
	Quinate	3.11926	0.0191333		Propionic acid	1.01723	0.00106936		L-Pyroglutamic acid	2.45841	0.0197522		Propionic acid	1.05475	0.00725632
	Raffinose	1.62561	0.0151573		Succinate	2.03219	0.000803647		L-Threonate	5.1443	0.025426		Raffinose	5.52626	0.00728604
	Sucrose	19.0069	0.0289622		Traumatic Acid	1.05979	0.00811291		Maleamic acid	2.73713	0.0497009		Salidroside	2.27559	0.00109777
	Traumatic Acid	2.95042	0.000604946		2-Dehydro-3-deoxy-D-gluconate	1.59233	0.0584867		Malonic acid	1.16843	0.04195		Succinate	2.21961	0.00783962
	Xanthine	1.1895	6.71802e-05		D-Galactarate	7.32733	0.0704725		myo-Inositol	7.84631	0.00664812		Traumatic Acid	1.32898	0.00129648
	3-Hydorxy-3-methylglutaric acid	1.86684	0.0743157		D-Mannose	2.95148	0.0943705		sn-Glycerol 3-phosphoethanolamine	1.1346	0.047465		Trehalose	1.86537	0.00343014
	4-Hydroxycinnamic acid	1.81615	0.0516625		D-Tagatose	1.15718	0.0500668		Succinate	1.82836	0.0196677		Uridine diphosphate glucose(UDP-D-Glucose)	1.14713	0.00320477
	cis-9-Palmitoleic acid	2.03391	0.0700334		L-Asparagine	3.43191	0.0788969		Xanthine	2.51234	3.27171e-05		Xanthine	2.93318	0.00879137
	D-Mannose	1.62364	0.0534813		myo-Inositol	5.04735	0.0700215		2'-Deoxyinosine 5'-monophosphate	1.67971	0.0706709		Capric acid	4.31511	0.0505157
	Glyoxylate	1.21499	0.0821098		Procyanidin B2	2.7499	0.0668327		2-Oxoadipic acid	1.39835	0.0908868		D-Proline	9.09398	0.0665417
	L-Ascorbic acid	1.71612	0.091198		Quinate	1.17619	0.0818217		3-Hydorxy-3-methylglutaric acid	1.53356	0.0752553		Dihydroxyacetone	1.06267	0.0753467
	L-Gulonic gamma-lactone	1.16686	0.0810307						Ammelide	1.41631	0.0984037		L-Malic acid	9.79578	0.0837886
	Procyanidin B2	6.59495	0.0853981						Capric acid	4.91963	0.0563568		Quinate	1.22096	0.0568805
	Rutin	2.76487	0.0689586						D-Proline	6.9828	0.0601522
	Stearic acid	3.95728	0.0769817						Dehydroascorbic acid (Oxidized vitamin C)	11.5177	0.0515503
									Dihydrouracil	4.15446	0.053132
									L-Glutamate	3.33313	0.0984738
									L-Gulonic gamma-lactone	1.3868	0.0564827
									Methylmalonic acid	2.56247	0.075108
									Myristoleic acid	10.0005	0.0552006
									Pantothenate	2.29	0.0931608
									Stearic acid	3.69963	0.0875925
									Sucrose	1.7557	0.0630787
D: ‘Dongzao’. P: ‘P15’. E: exocarp. M: mesocarp. G: green mature stage. W: white mature stage. H: half red stage

## Sheet: Table S3
Table S3. An overview of the RNA-Seq data.
Sample	Raw reads	Clean reads	Q30(%)	GC(%)	Paired map(%)
D-E-E-1	48175302	47109448	93.38	43.8	85.48
D-E-E-2	48242272	47391366	93.82	43.95	86.58
D-E-E-3	41842344	40900288	93.68	43.8	86.57
D-E-G-1	49143274	47901148	93.71	43.77	87.55
D-E-G-2	51765908	50621976	94.18	43.95	87.28
D-E-G-3	46826754	45581000	93.65	43.72	87.32
D-E-W-1	49678510	48373642	93.88	43.85	88.05
D-E-W-2	46221912	45016452	94.06	43.89	87.15
D-E-W-3	54369278	52917152	93.98	43.9	88.32
D-E-H-1	53013480	51852712	93.98	43.83	88.45
D-E-H-2	51253668	49744454	94.06	44.09	88.61
D-E-H-3	48728816	47842906	94.17	43.92	88.1
P-E-E-1	48736612	48032592	94.25	43.55	87.25
P-E-E-2	51598832	50233442	93.73	43.48	87.12
P-E-E-3	41347954	40353804	93.74	43.44	86.51
P-E-G-1	50363574	49417796	93.85	44.21	88.98
P-E-G-2	64064292	62550716	93.82	44.03	88.5
P-E-G-3	46619448	45614108	94.06	44.07	88.48
P-E-W-1	38853212	37959652	93.73	44.08	88.86
P-E-W-2	46559596	45347206	93.72	44.2	88.58
P-E-W-3	43522388	42549382	93.99	44.2	88.24
P-E-H-1	47297446	46456022	94.4	44.28	89.38
P-E-H-2	49589182	48517468	94.23	44.22	88.88
P-E-H-3	37380012	36662420	94.17	44.29	88.82
D-M-E-1	52752290	51926982	93.49	43.83	85.18
D-M-E-2	49737102	49035252	93.72	43.82	86.18
D-M-E-3	44142644	43248394	93.88	43.68	87.26
D-M-G-1	53426170	52611508	93.67	44.17	88.78
D-M-G-2	50084074	49347710	93.89	44.03	87.84
D-M-G-3	51327258	50486908	94.09	44.11	88.19
D-M-W-1	54552508	53754746	93.99	43.87	88.81
D-M-W-2	59080518	58278258	93.67	43.96	89.32
D-M-W-3	51708964	50998812	94.1	44.02	88.93
D-M-H-1	55360066	54403570	93.78	43.83	89.03
D-M-H-2	62153940	61193894	93.73	43.82	90.02
D-M-H-3	45752732	45168236	93.83	43.83	90.05
P-M-E-1	39517106	38427250	94.24	43.59	84.81
P-M-E-2	46709604	45738462	93.76	43.36	87.25
P-M-E-3	45759870	44962192	94	43.48	86.63
P-M-G-1	48255746	47477956	93.82	44.27	89.48
P-M-G-2	44158218	43304214	94.15	44.35	88.52
P-M-G-3	44814682	44188418	94.09	44.27	88.37
P-M-W-1	41097278	40530870	94.1	44.07	89.37
P-M-W-2	50342718	49485748	93.95	44.18	89.78
P-M-W-3	47697294	46737426	94.11	44.38	88.83
P-M-H-1	38564340	37866772	94.07	44.25	90.09
P-M-H-2	41919930	41357728	93.86	44.12	89.63
P-M-H-3	58954216	58011252	93.95	44.06	89.88
D: ‘Dongzao’. P: ‘P15’. E: exocarp. M: mesocarp. E: enlargement. G: green mature stage. W: white mature stage. H: half-red stage

## Sheet: Table S4
Table S4. Top 25 loading elements of O2PLS analysis in the exocarp.
ID	Names	Loading_1	Loading_2
M138T288	Anthranilic acid	-0.034	0.159
M177T138	L-Gulonic gamma-lactone	0.012	0.161
M407T52	Desmosterol	0.024	-0.158
M191T128	D-Galactarate	0.02	0.156
M129T444_2	Mesaconic acid	-0.136	0.078
M401T366	Galactinol	0.128	-0.089
M173T127	Dehydroascorbic acid	0.033	0.152
M258T387	Glycerophosphocholine	0.137	-0.07
M455T40_2	Maslinic Acid	0.036	-0.15
M133T404_2	L-Asparagine	0.141	-0.061
M161T260_2	D-Tagatose	0.145	0.049
M173T442	cis-Aconitate	-0.132	0.077
M577T201	Procyanidin B2	-0.01	-0.152
M165T96	trans-3-Coumaric acid	-0.07	-0.135
M283T43	Stearic acid	-0.079	0.13
M179T261	Alpha-D-Glucose	0.143	0.052
M360T365	Sucrose	0.123	-0.089
M303T92	(+-)-Taxifolin	0.003	-0.152
M609T321	Rutin	-0.15	-0.024
M71T127	Dihydroxyacetone	0.04	0.146
M143T260	Pyruvaldehyde	0.14	0.057
M149T260	D-Lyxose	0.139	0.061
M291T97	(-)-Epicatechin	-0.063	-0.137
M139T96	Gentisaldehyde	-0.062	-0.137
M122T84	Benzamide	-0.044	-0.144
evm.model.Contig0.0.7	photosystem II protein	-0.005	0.035
evm.model.Contig17.174	uncharacterized	0.006	0.035
evm.model.Contig72.1.75	Cytochrome P450	-0.002	-0.035
evm.model.Contig95.4	inositol polyphosphate 5-phosphatase	-0.008	-0.034
evm.model.Contig62.297	uncharacterized	-0.005	-0.034
evm.model.Contig22.279	uncharacterized	-0.009	-0.033
evm.model.Contig109.102	Zinc finger protein	-0.009	-0.033
evm.model.Contig75.279	glycosylphosphatidylinositol anchor attachment	-0.012	-0.033
evm.model.Contig70.84	purine transporter	-0.007	0.034
evm.model.Contig122.99	uncharacterized	0.001	0.034
evm.model.Contig21.3.273	uncharacterized	0.007	0.033
evm.model.Contig11.191	MYB transcription factor	-0.001	0.034
evm.model.Contig59.13	LOB domain-containing protein	-0.004	0.034
evm.model.Contig22.84	Disease resistance protein RPM1	-0.014	-0.031
evm.model.Contig41.185	uncharacterized	-0.005	-0.034
evm.model.Contig75.202	Pre-mRNA-splicing factor ATP-dependent RNA helicase	-0.014	-0.031
evm.model.Contig27.55	uncharacterized	0.01	0.032
evm.model.Contig33.1.22	Phytochrome-associated serine/threonine protein phosphatase	-0.015	-0.03
evm.model.Contig7.30	uncharacterized	-0.006	-0.033
evm.model.Contig5.603	uncharacterized	-0.005	-0.033
evm.model.Contig70.83	PURINE PERMEASE 1 family	-0.009	0.033
evm.model.Contig14.113	uncharacterized	-0.015	-0.03
evm.model.Contig23.0.4	Peroxisomal membrane protein	-0.01	-0.032
evm.model.Contig60.64	uncharacterized	-0.01	-0.032
evm.model.Contig116.50	Serine/threonine-protein phosphatase 6 regulatory ankyrin	0.01	0.032

## Sheet: Table S5
Table S5. Top 25 loading elements of O2PLS analysis in the mesocarp.
ID	Names	Loading_1	Loading_2
M114T48	6-Aminocaproic acid	0.013	0.182
M277T53	cis-9-Palmitoleic acid	0.037	0.171
M287T167	Kaempferol	0.01	-0.173
M152T228	2-Hydroxyadenine	0.069	0.157
M347T127	Dehydroascorbic acid	0.054	0.158
M323T300	Beta-d-lactose	0.034	-0.155
M206T317	N-Acetyl-L-phenylalanine	-0.044	0.152
M279T57	alpha-Linolenic acid	-0.046	0.15
M125T126	Malonic acid	0.004	0.154
M565T441	UDP-D-Glucose	0.066	-0.137
M195T390	L-Threonate	0.027	0.149
M241T397_1	alpha-D-Galactose 1-phosphate	0.101	0.113
M191T338	Quinate	-0.051	0.138
M132T348	Hydroxyproline	0.079	-0.123
M161T391	D-Tagatose	0.009	-0.145
M71T127	Dihydroxyacetone	0.004	0.145
M130T77	.beta.-Homoproline	0.058	-0.131
M117T141	Methylmalonic acid	0.111	0.089
M268T171	Adenosine	0.065	-0.125
M150T158	Triethanolamine	-0.038	0.134
M303T426	Morin	-0.068	0.122
M191T162_2	D-Galactarate	0.043	0.13
M295T70	16-Hydroxypalmitic acid	-0.002	0.137
M113T378_2	Dihydrouracil	0.12	0.065
M114T379	Maleamic acid	0.121	0.064
evm.model.Contig23.4.386	D-3-phosphoglycerate dehydrogenase	-0.017	0.031
evm.model.Contig51.23	AP2/B3-like transcriptional factor	-0.022	0.027
evm.model.Contig33.1.11	Ankyrin repeat-containing protein	-0.017	0.03
evm.model.Contig84.210	cofactor of APC complex	0.003	-0.035
evm.model.Contig116.462	EARLY RESPONSIVE TO DEHYDRATION	-0.011	0.033
evm.model.Contig112.95	uncharacterized	-0.004	0.034
evm.model.Contig95.20	uncharacterized	-0.001	0.034
evm.model.Contig17.159	urease accessory protein	-0.019	0.029
evm.model.Contig17.186	uncharacterized	-0.021	0.027
evm.model.Contig32.45	peptidyl-prolyl cis-trans isomerase	-0.007	0.034
evm.model.Contig111.15	G-type lectin S-receptor-like serine/threonine-protein kinase	-0.013	0.032
evm.model.Contig23.1.202	uncharacterized	0.013	-0.032
evm.model.Contig116.15	uncharacterized	-0.021	0.027
evm.model.Contig83.18	Digalactosyldiacylglycerol synthase	0.003	-0.034
evm.model.Contig37.0.123	heterogeneous nuclear ribonucleoprotein	-0.014	0.031
evm.model.Contig122.99	uncharacterized	-0.025	0.023
evm.model.Contig70.111	RING finger and CHY zinc finger domain-containing protein	-0.018	0.029
evm.model.Contig21.0.233	uncharacterized	-0.024	0.024
evm.model.Contig27.55	uncharacterized	0.004	0.034
evm.model.Contig109.313	30S ribosomal protein	0.001	0.034
evm.model.Contig12.2.4	DNA binding protein	-0.023	0.025
evm.model.Contig64.0.185	uncharacterized	-0.015	0.03
evm.model.Contig2.545	chlorophyll(ide) b reductase NOL	-0.02	0.027
evm.model.Contig24.1.119	uncharacterized	-0.007	0.033
evm.model.Contig73.166	cytochrome P450	-0.029	0.0179984
